# Supplementary material for: Matrix Metalloproteinase Gene Polymorphisms Are Associated with Breast Cancer in the Caucasian Women of Russia
Source: MDPI journal article supplement (doi:10.3390/ijms232012638), 2022-10-20
Supplement: s1 [file s1]

Supplementary table S9 sQTL values of the BC-associated SNPs of  
(according to Genotype-Tissue Expression (GTEx) (<http://www.gtexportal.org/>))

| Chr | SNP       | Gene Symbol    | Variant Id               |
|-----|-----------|----------------|--------------------------|
| 11  | rs1799750 | <i>WTAPP1</i>  | chr11_102799764_TC_T_b38 |
| 11  | rs679620  | <i>WTAPP1</i>  | chr11_102842889_T_C_b38  |
| 20  | rs3918242 | <i>CD40</i>    | chr20_46007337_C_T_b38   |
|     |           | <i>CD40</i>    | chr20_46007337_C_T_b38   |
|     |           | <i>CD40</i>    | chr20_46007337_C_T_b38   |
|     |           | <i>SLC12A5</i> | chr20_46007337_C_T_b38   |
|     |           | <i>CD40</i>    | chr20_46007337_C_T_b38   |
|     |           | <i>ACOT8</i>   | chr20_46007337_C_T_b38   |
|     |           | <i>CD40</i>    | chr20_46007337_C_T_b38   |
|     |           | <i>ACOT8</i>   | chr20_46007337_C_T_b38   |
| 20  | rs3918249 | <i>SLC12A5</i> | chr20_46009497_T_C_b38   |
|     |           | <i>SLC12A5</i> | chr20_46009497_T_C_b38   |
| 20  | rs17576   | <i>SLC12A5</i> | chr20_46011586_A_G_b38   |
|     |           | <i>SLC12A5</i> | chr20_46011586_A_G_b38   |
|     |           | <i>SLC12A5</i> | chr20_46011586_A_G_b38   |
|     |           | <i>SLC12A5</i> | chr20_46011586_A_G_b38   |
| 20  | rs3787268 | <i>PLTP</i>    | chr20_46013092_G_A_b38   |
|     |           | <i>PLTP</i>    | chr20_46013092_G_A_b38   |
|     |           | <i>PLTP</i>    | chr20_46013092_G_A_b38   |
| 20  | rs2250889 | <i>SLC12A5</i> | chr20_46013767_G_C_b38   |
| 20  | rs17577   | <i>SLC12A5</i> | chr20_46014472_G_A_b38   |
|     |           | <i>CD40</i>    | chr20_46014472_G_A_b38   |
|     |           | <i>SLC12A5</i> | chr20_46014472_G_A_b38   |
|     |           | <i>ACOT8</i>   | chr20_46014472_G_A_b38   |
|     |           | <i>ACOT8</i>   | chr20_46014472_G_A_b38   |
|     |           | <i>SLC12A5</i> | chr20_46014472_G_A_b38   |

the *MMP* genes  
 exportal.org/)) (  $p < 8.0E5$ .  $FDR \leq 0.05$ )

| Phenotype Id                                                              | Intron Id | p              |
|---------------------------------------------------------------------------|-----------|----------------|
| chr11:102832906:102833452:clu_16168:ENSG00( 102832906:102833452:clu_16168 |           | 0.000000000065 |
| chr11:102832906:102833452:clu_16168:ENSG00( 102832906:102833452:clu_16168 |           | 7.5E-41        |
| chr20:46126741:46128138:clu_33045:ENSG000( 46126741:46128138:clu_33045    |           | 0.0000000029   |
| chr20:46126741:46128138:clu_32508:ENSG000( 46126741:46128138:clu_32508    |           | 0.0000000067   |
| chr20:46126741:46128138:clu_32508:ENSG000( 46126741:46128138:clu_32508    |           | 0.0000000067   |
| chr20:46021886:46023369:clu_29529:ENSG000( 46021886:46023369:clu_29529    |           | 0.0000000098   |
| chr20:46126741:46128138:clu_27442:ENSG000( 46126741:46128138:clu_27442    |           | 0.00000041     |
| chr20:45841956:45844263:clu_24540:ENSG000( 45841956:45844263:clu_24540    |           | 0.0000011      |
| chr20:46126741:46128138:clu_22055:ENSG000( 46126741:46128138:clu_22055    |           | 0.0000015      |
| chr20:45841956:45844263:clu_27123:ENSG000( 45841956:45844263:clu_27123    |           | 0.0000041      |
| chr20:46021886:46023369:clu_29529:ENSG000( 46021886:46023369:clu_29529    |           | 0.00000000003  |
| chr20:46021886:46023369:clu_53353:ENSG000( 46021886:46023369:clu_53353    |           | 0.0000000099   |
| chr20:46023071:46023369:clu_24852:ENSG000( 46023071:46023369:clu_24852    |           | 0.00000029     |
| chr20:46021886:46023369:clu_19068:ENSG000( 46021886:46023369:clu_19068    |           | 0.00000056     |
| chr20:46023071:46023369:clu_25498:ENSG000( 46023071:46023369:clu_25498    |           | 0.00000078     |
| chr20:46021886:46023369:clu_26648:ENSG000( 46021886:46023369:clu_26648    |           | 0.000002       |
| chr20:46021886:46023369:clu_27001:ENSG000( 46021886:46023369:clu_27001    |           | 0.0000062      |
| chr20:46021886:46023369:clu_29529:ENSG000( 46021886:46023369:clu_29529    |           | 0.000000000093 |
| chr20:46023071:46023369:clu_24852:ENSG000( 46023071:46023369:clu_24852    |           | 0.00000033     |
| chr20:46021886:46023369:clu_26648:ENSG000( 46021886:46023369:clu_26648    |           | 0.000002       |
| chr20:46021886:46023369:clu_53353:ENSG000( 46021886:46023369:clu_53353    |           | 0.000011       |
| chr20:45907904:45909942:clu_30841:ENSG000( 45907904:45909942:clu_30841    |           | 0.00000016     |
| chr20:45907904:45909942:clu_31248:ENSG000( 45907904:45909942:clu_31248    |           | 0.0000011      |
| chr20:45907904:45909942:clu_31643:ENSG000( 45907904:45909942:clu_31643    |           | 0.0000096      |
| chr20:46021886:46023369:clu_29529:ENSG000( 46021886:46023369:clu_29529    |           | 0.0000000047   |
| chr20:46021886:46023369:clu_29529:ENSG000( 46021886:46023369:clu_29529    |           | 0.00000000011  |
| chr20:46126741:46128138:clu_32508:ENSG000( 46126741:46128138:clu_32508    |           | 0.000000006    |
| chr20:46126741:46128138:clu_32508:ENSG000( 46126741:46128138:clu_32508    |           | 0.000000006    |
| chr20:46126741:46128138:clu_33045:ENSG000( 46126741:46128138:clu_33045    |           | 0.000000043    |
| chr20:46126741:46128138:clu_27442:ENSG000( 46126741:46128138:clu_27442    |           | 0.00000038     |
| chr20:46126741:46128138:clu_22055:ENSG000( 46126741:46128138:clu_22055    |           | 0.00000092     |
| chr20:46023071:46023369:clu_25498:ENSG000( 46023071:46023369:clu_25498    |           | 0.0000012      |
| chr20:45841956:45844263:clu_24540:ENSG000( 45841956:45844263:clu_24540    |           | 0.0000018      |
| chr20:45841956:45844263:clu_27123:ENSG000( 45841956:45844263:clu_27123    |           | 0.0000021      |
| chr20:46023071:46023369:clu_32502:ENSG000( 46023071:46023369:clu_32502    |           | 0.000017       |

| Effect Size ( $\beta$ ) | Tissue                              |
|-------------------------|-------------------------------------|
| -0.51                   | Testis                              |
| 0.94                    | Testis                              |
| 0.5                     | Thyroid                             |
| 0.45                    | Lung                                |
| 0.45                    | Lung                                |
| 0.79                    | Pituitary                           |
| 0.49                    | Artery - Aorta                      |
| 0.58                    | Heart - Left Ventricle              |
| 0.74                    | Cells - EBV-transformed lymphocytes |
| 0.49                    | Heart - Atrial Appendage            |
| 0.63                    | Pituitary                           |
| 0.49                    | Testis                              |
| -0.44                   | Brain - Cortex                      |
| 0.61                    | Brain - Substantia nigra            |
| -0.32                   | Brain - Cerebellar Hemisphere       |
| 0.45                    | Brain - Cerebellum                  |
| 0.45                    | Spleen                              |
| 0.63                    | Pituitary                           |
| -0.45                   | Brain - Cortex                      |
| 0.46                    | Brain - Cerebellum                  |
| 0.38                    | Testis                              |
| 0.36                    | Adipose - Subcutaneous              |
| 0.41                    | Breast - Mammary Tissue             |
| 0.32                    | Skin - Sun Exposed (Lower leg)      |
| 0.38                    | Pituitary                           |
| 0.88                    | Pituitary                           |
| 0.45                    | Lung                                |
| 0.45                    | Lung                                |
| 0.46                    | Thyroid                             |
| 0.49                    | Artery - Aorta                      |
| 0.76                    | Cells - EBV-transformed lymphocytes |
| -0.43                   | Brain - Cerebellar Hemisphere       |
| 0.56                    | Heart - Left Ventricle              |
| 0.49                    | Heart - Atrial Appendage            |
| -0.41                   | Lung                                |
