# Supplementary material for: Matrix Metalloproteinase Gene Polymorphisms Are Associated with Breast Cancer in the Caucasian Women of Russia
Source: MDPI journal article supplement (doi:10.3390/ijms232012638), 2022-10-20
Supplement: s1 [file s1]

Supplementary table S2

Genotype combinations associated with breast cancer\*

| Model                          | N  | Genotype combinations                                    | <i>beta</i>  | P             | Risk,<br>High/Low |
|--------------------------------|----|----------------------------------------------------------|--------------|---------------|-------------------|
| Two-order interaction models   |    |                                                          |              |               |                   |
| 1                              | 1  | <b>GA (rs17577)xCC (rs3918242)</b>                       | <b>1.54</b>  | <b>0.0001</b> | <b>H</b>          |
|                                | 2  | <b>GG (rs17577)xCT (rs3918242)</b>                       | <b>1.54</b>  | <b>0.0001</b> | <b>H</b>          |
|                                | 3  | GA (rs17577)xCT (rs3918242)                              | -0.43        | 0.007         | L                 |
| 2                              | 4  | 1G1G (rs1799750)xAA (rs17576)                            | 0.50         | 0.010         | L                 |
|                                | 5  | 1G1G (rs1799750)xAG (rs17576)                            | -0.61        | 0.004         | H                 |
|                                | 6  | 1G2G (rs1799750)xAG (rs17576)                            | 0.34         | 0.026         | H                 |
| 3                              | 7  | GA (rs17577)xAA (rs17576)                                | 2.14         | 0.001         | H                 |
| 4                              | 8  | <b>1G1G (rs1799750)xTT (rs679620)</b>                    | <b>-0.79</b> | <b>0.0004</b> | <b>L</b>          |
| 5                              | 9  | CG (rs2250889)xCC (rs243865)                             | -0.62        | 0.011         | L                 |
| Three-order interaction models |    |                                                          |              |               |                   |
| 1                              | 1  | GG (rs17577)xCT (rs3918242)xCC (rs1940475)               | 1.69         | 0.047         | H                 |
|                                | 2  | GA (rs17577)xCC (rs3918242)xCT (rs1940475)               | 2.44         | 0.002         | H                 |
|                                | 3  | GG (rs17577)xCT (rs3918242)xCT (rs1940475)               | 1.41         | 0.011         | H                 |
| 2                              | 4  | GA (rs17577)xCC (rs3918242)xCC (rs243865)                | 1.28         | 0.013         | H                 |
|                                | 5  | GG (rs17577)xCT (rs3918242)xCC (rs243865)                | 2.34         | 0.003         | H                 |
|                                | 6  | GA (rs17577)xCC (rs3918242)xCT (rs243865)                | 1.82         | 0.003         | H                 |
|                                | 7  | GG (rs17577)xCT (rs3918242)xCT (rs243865)                | 1.25         | 0.018         | H                 |
|                                | 8  | GA (rs17577)xCT (rs3918242)xCT (rs243865)                | -0.70        | 0.007         | L                 |
| 3                              | 9  | GA (rs17577)xGG (rs3787268)xCC (rs3918242)               | 1.12         | 0.021         | H                 |
|                                | 10 | GA (rs17577)xGA (rs3787268)xCC (rs3918242)               | 2.12         | 0.008         | H                 |
|                                | 11 | GG (rs17577)xGG (rs3787268)xCT (rs3918242)               | 1.72         | 0.003         | H                 |
| 4                              | 12 | GA (rs17577)x1G1G (rs1799750)xCC (rs3918242)             | 1.33         | 0.044         | H                 |
|                                | 13 | GA (rs17577)x1G2G (rs1799750) xCC (rs3918242)            | 1.94         | 0.004         | H                 |
|                                | 14 | GA (rs17577)x1G1G (rs1799750)xCT (rs3918242)             | -0.93        | 0.003         | L                 |
|                                | 15 | GG (rs17577)x1G2G (rs1799750)xCT (rs3918242)             | 1.31         | 0.013         | H                 |
|                                | 16 | GG (rs17577)x2G2G (rs1799750)xCT (rs3918242)             | 1.62         | 0.049         | H                 |
|                                | 17 | GA (rs17577)x2G2G (rs1799750)xCT (rs3918242)             | -0.79        | 0.020         | L                 |
| 5                              | 18 | GA (rs17577)xCC (rs3918242)xCC (rs679620)                | 1.72         | 0.041         | H                 |
|                                | 19 | GG (rs17577)xCT (rs3918242)xCC (rs679620)                | 1.91         | 0.004         | H                 |
|                                | 20 | GG (rs17577)xCT (rs3918242)xCT (rs679620)                | 1.05         | 0.050         | H                 |
|                                | 21 | GA (rs17577)xCC (rs3918242)xTT (rs679620)                | 1.83         | 0.007         | H                 |
|                                | 22 | GA (rs17577)xCT (rs3918242)xTT (rs679620)                | -1.18        | 0.001         | L                 |
| 6                              | 23 | <b>GA (rs17577)xCC (rs2250889)xCC (rs3918242)</b>        | <b>1.54</b>  | <b>0.0004</b> | <b>H</b>          |
|                                | 24 | <b>GG (rs17577)xCC (rs2250889)xCT (rs3918242)</b>        | <b>1.61</b>  | <b>0.0002</b> | <b>H</b>          |
|                                | 25 | GA (rs17577)xCC (rs2250889)xCT (rs3918242)               | -0.35        | 0.039         | L                 |
| Four-order interaction models  |    |                                                          |              |               |                   |
| 1                              | 1  | GG (rs17577)xAA (rs3787268)xCC (rs3918242)xCC (rs243865) | 0.79         | 0.048         | H                 |
|                                | 2  | GG (rs17577)xGG (rs3787268)xCT (rs3918242)xCC (rs243865) | 2.56         | 0.017         | H                 |

|                               |   |                                                                             |       |       |   |
|-------------------------------|---|-----------------------------------------------------------------------------|-------|-------|---|
|                               | 3 | GA (rs17577)xAA (rs3787268)xCC (rs3918242)xCT (rs243865)                    | 1.41  | 0.034 | H |
|                               | 4 | GA (rs17577)xAA (rs3787268)xCT (rs3918242)xCT (rs243865)                    | -0.57 | 0.050 | L |
| 2                             | 5 | 1G1G (rs1799750)xTT (rs3918249)xCT (rs1940475)xCC (rs243865)                | 0.74  | 0.028 | H |
|                               | 6 | 1G2G (rs1799750)xCC (rs3918249)xCT (rs1940475)xCC (rs243865)                | 0.94  | 0.038 | H |
|                               | 7 | 1G2G (rs1799750)xTC (rs3918249)xTT (rs1940475)xCC (rs243865)                | 0.83  | 0.019 | H |
|                               | 8 | 1G2G (rs1799750)xTC (rs3918249)xCT (rs1940475)xCT (rs243865)                | 0.93  | 0.007 | H |
| Five-order interaction models |   |                                                                             |       |       |   |
| 1                             | 1 | CC (rs2250889)x1G1G (rs1799750)xTT (rs3918249)xCT (rs1940475)xCC (rs243865) | 1.39  | 0.002 | H |
|                               | 2 | CC (rs2250889)x1G2G (rs1799750)xTC (rs3918249)xTT (rs1940475)xCC (rs243865) | 0.91  | 0.012 | H |
|                               | 3 | CC (rs2250889)x1G1G (rs1799750)xTT (rs3918249)xCT (rs1940475)xCT (rs243865) | 1.08  | 0.040 | H |
|                               | 4 | CC (rs2250889)x1G2G (rs1799750)xTC (rs3918249)xCT (rs1940475)xCT (rs243865) | 1.01  | 0.005 | H |

\* Genotype combinations are derived from the interaction models obtained by the MB-MDR method and described in tables 4
