# Supplementary material for: Matrix Metalloproteinase Gene Polymorphisms Are Associated with Breast Cancer in the Caucasian Women of Russia
Source: MDPI journal article supplement (doi:10.3390/ijms232012638), 2022-10-20
Supplement: s1 [file s1]

( HaploReg, v4.1, <http://archive.broadinstitute.org/mammals/haploreg/haploreg.php>)

( HaploReg, v4.1, <http://archive.broadinstitute.org/mammals/haploreg/haploreg.php>)

|     |            |                           |     |     | AFR  | AMR  | ASN  | EUR  | GERP | SiPhy | Promoter   | Enhancer        |
|-----|------------|---------------------------|-----|-----|------|------|------|------|------|-------|------------|-----------------|
| chr | pos (hg38) | variant                   | Ref | Alt | freq | freq | freq | freq | cons | cons  | histone    | histone         |
|     |            |                           |     |     |      |      |      |      |      |       | marks      | marks           |
| 11  | 102722517  | <a href="#">rs1940475</a> | T   | C   | 0.72 | 0.54 | 0.59 | 0.53 |      |       |            | BLD             |
| 11  | 102799764  | <a href="#">rs1799750</a> | TC  | T   | 0.55 | 0.44 | 0.33 | 0.49 |      |       |            | 6 tissues       |
| 11  | 102842889  | <a href="#">rs679620</a>  | T   | C   | 0.71 | 0.64 | 0.67 | 0.54 |      |       |            |                 |
| 16  | 55477894   | <a href="#">rs243865</a>  | C   | T   | 0.02 | 0.19 | 0.09 | 0.27 |      |       | 4 tissues  | 15 tissues      |
| 20  | 46007337   | <a href="#">rs3918242</a> | C   | T   | 0.12 | 0.09 | 0.17 | 0.17 |      |       |            | BLD, THYM, SPLN |
| 20  | 46009497   | <a href="#">rs3918249</a> | T   | C   | 0.56 | 0.31 | 0.72 | 0.39 |      |       | 4 tissues  | BLD             |
| 20  | 46011586   | <a href="#">rs17576</a>   | A   | G   | 0.35 | 0.28 | 0.72 | 0.39 |      |       | 17 tissues | 4 tissues       |
| 20  | 46013092   | <a href="#">rs3787268</a> | G   | A   | 0.09 | 0.16 | 0.36 | 0.21 |      |       | BLD, SKIN  | BLD             |
| 20  | 46013767   | <a href="#">rs2250889</a> | G   | C   | 0.82 | 0.80 | 0.76 | 0.95 |      |       | 24 tissues |                 |
| 20  | 46014472   | <a href="#">rs17577</a>   | G   | A,C | 0.17 | 0.10 | 0.18 | 0.18 |      |       | 21 tissues | SKIN            |

|                   | Proteins         | Motifs            | NHGRI/EBI | GRASP<br>QTL | Selected<br>eQTL | GENCODE                 |
|-------------------|------------------|-------------------|-----------|--------------|------------------|-------------------------|
| DNAse             | bound            | changed           | GWAS hits | hits         | hits             | genes                   |
| BLD,BLD           |                  | CIZ,Myc,NF-AT1    |           | 1 hit        | 2 hits           | <i>MMP8</i>             |
| 5 tissues         | CFOS,GATA2       | 21 altered motifs |           |              | 8 hits           | 1.6kb 5' of <i>MMP1</i> |
|                   |                  | p300              |           |              | 3 hits           | <i>MMP3</i>             |
| ESDR,IPSC,<br>MUS |                  | Myf               |           | 1 hit        | 1 hit            | <i>MMP2</i>             |
| IPSC              |                  | 4 altered motifs  |           | 1 hit        | 6 hits           | 1.6kb 5' of <i>MMP9</i> |
| BLD,BLD           |                  | 4 altered motifs  |           |              | 9 hits           | <i>MMP9</i>             |
| ESC               |                  | Pax-4             |           |              | 12 hits          | <i>MMP9</i>             |
| BLD,BLD           |                  | 6 altered motifs  |           |              | 4 hits           | <i>MMP9</i>             |
| 15 tissues        | CTCF             | NRSF              |           |              |                  | <i>MMP9</i>             |
| 22 tissues        | 4 bound proteins |                   |           | 1 hit        | 6 hits           | <i>MMP9</i>             |

| RefSeq                  | dbSNP      |
|-------------------------|------------|
| genes                   | func annot |
| <i>MMP8</i>             | missense   |
| <i>LOC100288077</i>     | intronic   |
| <i>MMP3</i>             | missense   |
| <i>1.3kb 5' of MMP2</i> |            |
| <i>1.6kb 5' of MMP9</i> |            |
| <i>MMP9</i>             | intronic   |
| <i>MMP9</i>             | missense   |
| <i>MMP9</i>             | intronic   |
| <i>MMP9</i>             | missense   |
| <i>MMP9</i>             | missense   |
