# Supplementary material for: Matrix Metalloproteinase Gene Polymorphisms Are Associated with Breast Cancer in the Caucasian Women of Russia
Source: MDPI journal article supplement (doi:10.3390/ijms232012638), 2022-10-20
Supplement: s1 [file s1]

Supplementary table S6 cis-eQTL values of the SNPs in high LD ( $r^2 \geq 0.80$ ) with BC-associated SNPs of the *M* (according to Blood eQTL browser (<http://genenetwork.nl/bloodeqtlbrowser/>),  $FDR \leq 0.05$ )

| Chr | Lead SNP  | Position lead<br>SNP(hg38) | Proxy SNP | Position proxy<br>SNP (hg38) | Distance (bp) between proxy<br>and lead SNP |
|-----|-----------|----------------------------|-----------|------------------------------|---------------------------------------------|
| 16  | rs243865  | 55477894                   | rs243866  | 55477625                     | -269                                        |
| 16  | rs243865  | 55477894                   | rs243864  | 55478410                     | 516                                         |
| 20  | rs3918242 | 46007337                   | rs1888235 | 45995328                     | 12009                                       |
| 20  | rs3918242 | 46007337                   | rs6065912 | 46003728                     | 3609                                        |
| 20  | rs3918242 | 46007337                   | rs3918241 | 46007096                     | 241                                         |
| 20  | rs3918242 | 46007337                   | rs2274755 | 46011053                     | -3716                                       |
| 20  | rs3918242 | 46007337                   | rs2236416 | 46011936                     | -4599                                       |
| 20  | rs3918242 | 46007337                   | rs3918261 | 46014953                     | -7616                                       |
| 20  | rs3918242 | 46007337                   | rs3918270 | 46016700                     | -9363                                       |
| 20  | rs3787268 | 46013092                   | rs6073983 | 46001252                     | 11840                                       |
| 20  | rs3787268 | 46013092                   | rs6073991 | 46027473                     | -14381                                      |
| 20  | rs17577   | 46014472                   | rs1888235 | 45995328                     | 19144                                       |
| 20  | rs17577   | 46014472                   | rs6065912 | 46003728                     | 10744                                       |
| 20  | rs17577   | 46014472                   | rs3918241 | 46007096                     | 7376                                        |
| 20  | rs17577   | 46014472                   | rs2274755 | 46011053                     | 3419                                        |
| 20  | rs17577   | 46014472                   | rs2236416 | 46011936                     | 2536                                        |
| 20  | rs17577   | 46014472                   | rs3918261 | 46014953                     | -481                                        |
| 20  | rs17577   | 46014472                   | rs3918270 | 44645339                     | 1369133                                     |

MP genes in blood

| r2 between<br>lead and<br>proxy | D<br>between<br>lead and<br>proxy | Gene Symbol        | Z-score | p        | FDR  |
|---------------------------------|-----------------------------------|--------------------|---------|----------|------|
| 0.99                            | 1                                 | AYTL1              | -16.6   | 6.96E-62 | 0    |
| 0.99                            | 1                                 | AYTL1              | -17.55  | 6.03E-69 | 0    |
| 0.95                            | 0.98                              | AL162458.10-3,MMP9 | 11.09   | 1.15E-32 | 0    |
|                                 |                                   | DNTTIP1            | -4.7    | 2.61E-06 | 0    |
| 0.86                            | 0.98                              | AL162458.10-3,MMP9 | 12.83   | 2.59E-32 | 0    |
|                                 |                                   | DNTTIP1            | -4.85   | 1.26E-06 | 0    |
| 1                               | 1                                 | AL162458.10-3,MMP9 | 12.33   | 6.62E-35 | 0    |
|                                 |                                   | DNTTIP1            | -4.6    | 4.21E-06 | 0    |
| 0.99                            | 1                                 | AL162458.10-3,MMP9 | 12.57   | 3.19E-36 | 0    |
|                                 |                                   | DNTTIP1            | -4.18   | 0.000029 | 0.01 |
| 0.99                            | 1                                 | AL162458.10-3,MMP9 | 12.59   | 2.33E-36 | 0    |
|                                 |                                   | DNTTIP1            | -4.13   | 0.000035 | 0.02 |
| 0.98                            | 1                                 | AL162458.10-3,MMP9 | 12.62   | 1.64E-36 | 0    |
|                                 |                                   | DNTTIP1            | -4.18   | 0.000029 | 0.01 |
| 0.96                            | 1                                 | AL162458.10-3,MMP9 | 12.62   | 1.64E-36 | 0    |
|                                 |                                   | DNTTIP1            | -4.18   | 0.000028 | 0.01 |
| 0.89                            | 0.98                              | AL162458.10-3,MMP9 | -8.59   | 8.68E-18 | 0    |
| 0.95                            | 0.98                              | AL162458.10-3,MMP9 | -8.85   | 8.99E-19 | 0    |
| 0.94                            | 0.98                              | AL162458.10-3,MMP9 | 11.09   | 1.15E-32 | 0    |
|                                 |                                   | DNTTIP1            | -4.7    | 2.61E-06 | 0    |
| 0.84                            | 0.98                              | AL162458.10-3,MMP9 | 11.83   | 2.59E-32 | 0    |
|                                 |                                   | DNTTIP1            | -4.85   | 1.26E-06 | 0    |
| 0.98                            | 1                                 | AL162458.10-3,MMP9 | 12.33   | 6.62E-35 | 0    |
|                                 |                                   | DNTTIP1            | -4.6    | 4.21E-06 | 0    |
| 0.99                            | 1                                 | AL162458.10-3,MMP9 | 12.57   | 3.19E-36 | 0    |
|                                 |                                   | DNTTIP1            | -4.18   | 0.000029 | 0.01 |
| 0.99                            | 1                                 | AL162458.10-3,MMP9 | 12.59   | 2.33E-36 | 0    |
|                                 |                                   | DNTTIP1            | -4.13   | 0.000035 | 0.02 |
| 1                               | 1                                 | AL162458.10-3,MMP9 | 12.62   | 1.64E-36 | 0    |
|                                 |                                   | DNTTIP1            | -4.18   | 0.000029 | 0.01 |
| 0.98                            | 1                                 | AL162458.10-3,MMP9 | 12.62   | 1.64E-36 | 0    |
|                                 |                                   | DNTTIP1            | -4.18   | 0.000028 | 0.01 |
