# Supplementary material for: Matrix Metalloproteinase Gene Polymorphisms Are Associated with Breast Cancer in the Caucasian Women of Russia
Source: MDPI journal article supplement (doi:10.3390/ijms232012638), 2022-10-20
Supplement: s1 [file s1]

Supplementary Table S14 Results of the gene-gene interaction analysis of the BC-associated

| Gene 1         | Gene 2         | Weight       | Network group | Network               |
|----------------|----------------|--------------|---------------|-----------------------|
| <i>MMP1</i>    | <i>MMP8</i>    | 0.01994568   | Co-expression | Arijs-Rutgeerts-2009  |
| <i>MMP3</i>    | <i>MMP8</i>    | 0.014503988  | Co-expression | Arijs-Rutgeerts-2009  |
| <i>MMP3</i>    | <i>MMP1</i>    | 0.012034981  | Co-expression | Arijs-Rutgeerts-2009  |
| <i>SLC12A5</i> | <i>ZNF335</i>  | 0.003524543  | Co-expression | Arijs-Rutgeerts-2009  |
| <i>MMP9</i>    | <i>MMP8</i>    | 0.018592577  | Co-expression | Arijs-Rutgeerts-2009  |
| <i>MMP9</i>    | <i>MMP1</i>    | 0.011928413  | Co-expression | Arijs-Rutgeerts-2009  |
| <i>MMP9</i>    | <i>MMP3</i>    | 0.009092866  | Co-expression | Arijs-Rutgeerts-2009  |
| <i>MMP10</i>   | <i>MMP8</i>    | 0.025001792  | Co-expression | Arijs-Rutgeerts-2009  |
| <i>MMP10</i>   | <i>MMP1</i>    | 0.016835684  | Co-expression | Arijs-Rutgeerts-2009  |
| <i>MMP10</i>   | <i>MMP3</i>    | 0.014015151  | Co-expression | Arijs-Rutgeerts-2009  |
| <i>MMP10</i>   | <i>MMP9</i>    | 0.016440187  | Co-expression | Arijs-Rutgeerts-2009  |
| <i>MMP11</i>   | <i>SLC12A5</i> | 0.0041121915 | Co-expression | Arijs-Rutgeerts-2009  |
| <i>MMP13</i>   | <i>MMP8</i>    | 0.020443471  | Co-expression | Arijs-Rutgeerts-2009  |
| <i>MMP12</i>   | <i>MMP8</i>    | 0.016926065  | Co-expression | Arijs-Rutgeerts-2009  |
| <i>MMP12</i>   | <i>MMP1</i>    | 0.011808239  | Co-expression | Arijs-Rutgeerts-2009  |
| <i>MMP12</i>   | <i>MMP3</i>    | 0.009681639  | Co-expression | Arijs-Rutgeerts-2009  |
| <i>MMP12</i>   | <i>MMP9</i>    | 0.012654959  | Co-expression | Arijs-Rutgeerts-2009  |
| <i>MMP12</i>   | <i>MMP10</i>   | 0.018506225  | Co-expression | Arijs-Rutgeerts-2009  |
| <i>MMP7</i>    | <i>MMP10</i>   | 0.01624499   | Co-expression | Arijs-Rutgeerts-2009  |
| <i>MMP26</i>   | <i>MMP27</i>   | 0.003192505  | Co-expression | Arijs-Rutgeerts-2009  |
| <i>MMP3</i>    | <i>MMP1</i>    | 0.03471106   | Co-expression | Bild-Nevins-2006 B    |
| <i>MMP2</i>    | <i>MMP3</i>    | 0.010101463  | Co-expression | Bild-Nevins-2006 B    |
| <i>MMP11</i>   | <i>MMP1</i>    | 0.01595287   | Co-expression | Bild-Nevins-2006 B    |
| <i>MMP11</i>   | <i>MMP2</i>    | 0.009790911  | Co-expression | Bild-Nevins-2006 B    |
| <i>MMP11</i>   | <i>MMP10</i>   | 0.011269141  | Co-expression | Bild-Nevins-2006 B    |
| <i>MMP14</i>   | <i>MMP11</i>   | 0.015116542  | Co-expression | Bild-Nevins-2006 B    |
| <i>MMP25</i>   | <i>MMP15</i>   | 0.007518016  | Co-expression | Bild-Nevins-2006 B    |
| <i>MMP7</i>    | <i>MMP12</i>   | 0.009254638  | Co-expression | Bild-Nevins-2006 B    |
| <i>MMP2</i>    | <i>MMP1</i>    | 0.014201451  | Co-expression | Rosenwald-Staudt-2001 |
| <i>MMP9</i>    | <i>MMP1</i>    | 0.010204952  | Co-expression | Rosenwald-Staudt-2001 |
| <i>MMP9</i>    | <i>MMP2</i>    | 0.005824463  | Co-expression | Rosenwald-Staudt-2001 |
| <i>MMP15</i>   | <i>MMP2</i>    | 0.010811945  | Co-expression | Rosenwald-Staudt-2001 |
| <i>MMP15</i>   | <i>MMP9</i>    | 0.00978206   | Co-expression | Rosenwald-Staudt-2001 |
| <i>MMP12</i>   | <i>MMP14</i>   | 0.0053635295 | Co-expression | Rosenwald-Staudt-2001 |
| <i>MMP3</i>    | <i>MMP1</i>    | 0.031768974  | Co-expression | Ramaswamy-Golub-2001  |
| <i>MMP10</i>   | <i>MMP1</i>    | 0.029388728  | Co-expression | Ramaswamy-Golub-2001  |
| <i>MMP13</i>   | <i>MMP10</i>   | 0.0159287    | Co-expression | Ramaswamy-Golub-2001  |
| <i>MMP12</i>   | <i>MMP1</i>    | 0.053733964  | Co-expression | Ramaswamy-Golub-2001  |
| <i>MMP12</i>   | <i>MMP3</i>    | 0.028386803  | Co-expression | Ramaswamy-Golub-2001  |
| <i>MMP7</i>    | <i>MMP11</i>   | 0.014169933  | Co-expression | Ramaswamy-Golub-2001  |
| <i>MMP7</i>    | <i>MMP12</i>   | 0.023871709  | Co-expression | Ramaswamy-Golub-2001  |
| <i>MMP3</i>    | <i>MMP1</i>    | 0.021670682  | Co-expression | Innocenti-Brown-2011  |
| <i>SLC12A5</i> | <i>MMP8</i>    | 0.01042752   | Co-expression | Innocenti-Brown-2011  |

|              |              |              |               |                            |
|--------------|--------------|--------------|---------------|----------------------------|
| <i>MMP10</i> | <i>MMP1</i>  | 0.025890643  | Co-expression | Innocenti-Brown-2011       |
| <i>MMP10</i> | <i>MMP3</i>  | 0.03973388   | Co-expression | Innocenti-Brown-2011       |
| <i>MMP24</i> | <i>MMP13</i> | 0.019798096  | Co-expression | Innocenti-Brown-2011       |
| <i>MMP25</i> | <i>MMP9</i>  | 0.032020573  | Co-expression | Innocenti-Brown-2011       |
| <i>MMP9</i>  | <i>MMP8</i>  | 0.028932996  | Co-expression | Burington-Shaughnessy-2008 |
| <i>MMP24</i> | <i>MMP11</i> | 0.0022543943 | Co-expression | Burington-Shaughnessy-2008 |
| <i>MMP25</i> | <i>MMP2</i>  | 0.010628911  | Co-expression | Burington-Shaughnessy-2008 |
| <i>MMP19</i> | <i>MMP13</i> | 0.009604596  | Co-expression | Burington-Shaughnessy-2008 |
| <i>MMP20</i> | <i>MMP11</i> | 0.006200976  | Co-expression | Burington-Shaughnessy-2008 |
| <i>HPX</i>   | <i>MMP25</i> | 0.0112562915 | Co-expression | Burington-Shaughnessy-2008 |
| <i>MMP2</i>  | <i>MMP1</i>  | 0.012227431  | Co-expression | Alizadeh-Staudt-2000       |
| <i>MMP9</i>  | <i>MMP1</i>  | 0.008568336  | Co-expression | Alizadeh-Staudt-2000       |
| <i>MMP9</i>  | <i>MMP2</i>  | 0.0064525036 | Co-expression | Alizadeh-Staudt-2000       |
| <i>MMP14</i> | <i>MMP3</i>  | 0.02104439   | Co-expression | Alizadeh-Staudt-2000       |
| <i>MMP15</i> | <i>MMP2</i>  | 0.009046634  | Co-expression | Alizadeh-Staudt-2000       |
| <i>MMP15</i> | <i>MMP9</i>  | 0.008582863  | Co-expression | Alizadeh-Staudt-2000       |
| <i>MMP7</i>  | <i>MMP3</i>  | 0.025251048  | Co-expression | Alizadeh-Staudt-2000       |
| <i>MMP9</i>  | <i>MMP1</i>  | 0.023311744  | Co-expression | Wang-Maris-2006            |
| <i>MMP10</i> | <i>MMP2</i>  | 0.013783539  | Co-expression | Wang-Maris-2006            |
| <i>MMP12</i> | <i>MMP1</i>  | 0.03607238   | Co-expression | Wang-Maris-2006            |
| <i>MMP12</i> | <i>MMP9</i>  | 0.028320719  | Co-expression | Wang-Maris-2006            |
| <i>MMP19</i> | <i>MMP14</i> | 0.010384828  | Co-expression | Wang-Maris-2006            |
| <i>MMP20</i> | <i>MMP8</i>  | 0.019756397  | Co-expression | Wang-Maris-2006            |
| <i>MMP20</i> | <i>MMP9</i>  | 0.016377661  | Co-expression | Wang-Maris-2006            |
| <i>MMP9</i>  | <i>MMP1</i>  | 0.014893332  | Co-expression | Chen-Brown-2002            |
| <i>MMP12</i> | <i>MMP9</i>  | 0.017586546  | Co-expression | Chen-Brown-2002            |
| <i>MMP27</i> | <i>MMP1</i>  | 0.022062583  | Co-expression | Chen-Brown-2002            |
| <i>MMP9</i>  | <i>MMP1</i>  | 0.008684233  | Co-expression | Wang-Cheung-2015           |
| <i>MMP28</i> | <i>MMP13</i> | 0.016147366  | Co-expression | Wang-Cheung-2015           |
| <i>MMP12</i> | <i>MMP3</i>  | 0.0019335776 | Co-expression | Wang-Cheung-2015           |
| <i>CETP</i>  | <i>MMP20</i> | 0.0047225663 | Co-expression | Wang-Cheung-2015           |
| <i>MMP9</i>  | <i>MMP8</i>  | 0.007594278  | Co-expression | Roth-Zlotnik-2006          |
| <i>CETP</i>  | <i>MMP9</i>  | 0.016817342  | Co-expression | Roth-Zlotnik-2006          |
| <i>MMP26</i> | <i>MMP11</i> | 0.030658517  | Co-expression | Roth-Zlotnik-2006          |
| <i>MMP3</i>  | <i>MMP1</i>  | 0.004863176  | Co-expression | Boldrick-Relman-2002       |
| <i>MMP12</i> | <i>MMP3</i>  | 0.005013258  | Co-expression | Boldrick-Relman-2002       |
| <i>MMP3</i>  | <i>MMP1</i>  | 0.0071732434 | Co-expression | Dobbin-Giordano-2005       |
| <i>MMP10</i> | <i>MMP1</i>  | 0.0087530175 | Co-expression | Dobbin-Giordano-2005       |
| <i>MMP10</i> | <i>MMP3</i>  | 0.009577051  | Co-expression | Dobbin-Giordano-2005       |
| <i>MMP11</i> | <i>MMP2</i>  | 0.012768546  | Co-expression | Dobbin-Giordano-2005       |
| <i>MMP13</i> | <i>MMP9</i>  | 0.015401816  | Co-expression | Dobbin-Giordano-2005       |
| <i>MMP13</i> | <i>MMP10</i> | 0.011859682  | Co-expression | Dobbin-Giordano-2005       |
| <i>MMP14</i> | <i>MMP2</i>  | 0.010036182  | Co-expression | Dobbin-Giordano-2005       |
| <i>HPX</i>   | <i>CETP</i>  | 0.015065216  | Co-expression | Dobbin-Giordano-2005       |
| <i>MMP3</i>  | <i>MMP8</i>  | 0.004047781  | Co-expression | Wu-Garvey-2007             |
| <i>MMP13</i> | <i>MMP1</i>  | 0.007974415  | Co-expression | Wu-Garvey-2007             |
| <i>MMP17</i> | <i>MMP2</i>  | 0.010059839  | Co-expression | Wu-Garvey-2007             |

|              |              |              |                       |                        |
|--------------|--------------|--------------|-----------------------|------------------------|
| <i>MMP12</i> | <i>MMP8</i>  | 0.0052404157 | Co-expression         | Wu-Garvey-2007         |
| <i>MMP19</i> | <i>MMP24</i> | 0.0060998728 | Co-expression         | Wu-Garvey-2007         |
| <i>HPX</i>   | <i>MMP11</i> | 0.009168258  | Co-expression         | Wu-Garvey-2007         |
| <i>PLTP</i>  | <i>SNX21</i> | 0.018297002  | Co-localization       | Johnson-Shoemaker-2003 |
| <i>MMP2</i>  | <i>MMP3</i>  | 0.0063566775 | Co-localization       | Johnson-Shoemaker-2003 |
| <i>MMP2</i>  | <i>PLTP</i>  | 0.005005489  | Co-localization       | Johnson-Shoemaker-2003 |
| <i>MMP9</i>  | <i>MMP8</i>  | 0.01102059   | Co-localization       | Johnson-Shoemaker-2003 |
| <i>MMP10</i> | <i>MMP3</i>  | 0.02944486   | Co-localization       | Johnson-Shoemaker-2003 |
| <i>MMP24</i> | <i>MMP16</i> | 0.012562963  | Co-localization       | Johnson-Shoemaker-2003 |
| <i>MMP14</i> | <i>MMP3</i>  | 0.007614681  | Co-localization       | Johnson-Shoemaker-2003 |
| <i>MMP14</i> | <i>PLTP</i>  | 0.0065223807 | Co-localization       | Johnson-Shoemaker-2003 |
| <i>MMP14</i> | <i>MMP2</i>  | 0.0035088009 | Co-localization       | Johnson-Shoemaker-2003 |
| <i>MMP14</i> | <i>MMP10</i> | 0.006571168  | Co-localization       | Johnson-Shoemaker-2003 |
| <i>MMP19</i> | <i>MMP14</i> | 0.009298849  | Co-localization       | Johnson-Shoemaker-2003 |
| <i>MMP7</i>  | <i>MMP2</i>  | 0.0052156677 | Co-localization       | Johnson-Shoemaker-2003 |
| <i>MMP7</i>  | <i>MMP14</i> | 0.006517967  | Co-localization       | Johnson-Shoemaker-2003 |
| <i>MMP3</i>  | <i>MMP1</i>  | 0.01170476   | Physical Interactions | Vastrik-Stein-2007     |
| <i>MMP2</i>  | <i>MMP1</i>  | 0.013150669  | Physical Interactions | Vastrik-Stein-2007     |
| <i>MMP2</i>  | <i>MMP3</i>  | 0.012468514  | Physical Interactions | Vastrik-Stein-2007     |
| <i>MMP9</i>  | <i>MMP1</i>  | 0.014410078  | Physical Interactions | Vastrik-Stein-2007     |
| <i>MMP10</i> | <i>MMP8</i>  | 0.034334067  | Physical Interactions | Vastrik-Stein-2007     |
| <i>MMP10</i> | <i>MMP1</i>  | 0.022712572  | Physical Interactions | Vastrik-Stein-2007     |
| <i>MMP10</i> | <i>MMP3</i>  | 0.021534419  | Physical Interactions | Vastrik-Stein-2007     |
| <i>MMP10</i> | <i>MMP2</i>  | 0.024194602  | Physical Interactions | Vastrik-Stein-2007     |
| <i>MMP10</i> | <i>MMP9</i>  | 0.026511664  | Physical Interactions | Vastrik-Stein-2007     |
| <i>MMP11</i> | <i>MMP8</i>  | 0.034191784  | Physical Interactions | Vastrik-Stein-2007     |
| <i>MMP11</i> | <i>MMP1</i>  | 0.022618448  | Physical Interactions | Vastrik-Stein-2007     |
| <i>MMP11</i> | <i>MMP3</i>  | 0.02144518   | Physical Interactions | Vastrik-Stein-2007     |
| <i>MMP11</i> | <i>MMP2</i>  | 0.02409434   | Physical Interactions | Vastrik-Stein-2007     |
| <i>MMP11</i> | <i>MMP9</i>  | 0.0264018    | Physical Interactions | Vastrik-Stein-2007     |
| <i>MMP13</i> | <i>MMP3</i>  | 0.013307539  | Physical Interactions | Vastrik-Stein-2007     |
| <i>MMP13</i> | <i>MMP10</i> | 0.025822693  | Physical Interactions | Vastrik-Stein-2007     |
| <i>MMP13</i> | <i>MMP11</i> | 0.025715683  | Physical Interactions | Vastrik-Stein-2007     |
| <i>MMP14</i> | <i>MMP8</i>  | 0.026552005  | Physical Interactions | Vastrik-Stein-2007     |
| <i>MMP14</i> | <i>MMP1</i>  | 0.017564604  | Physical Interactions | Vastrik-Stein-2007     |
| <i>MMP14</i> | <i>MMP3</i>  | 0.016653487  | Physical Interactions | Vastrik-Stein-2007     |
| <i>MMP14</i> | <i>MMP2</i>  | 0.018710723  | Physical Interactions | Vastrik-Stein-2007     |
| <i>MMP14</i> | <i>MMP9</i>  | 0.020502605  | Physical Interactions | Vastrik-Stein-2007     |
| <i>MMP14</i> | <i>MMP13</i> | 0.019969795  | Physical Interactions | Vastrik-Stein-2007     |
| <i>MMP14</i> | <i>MMP16</i> | 0.13556261   | Physical Interactions | Vastrik-Stein-2007     |
| <i>MMP15</i> | <i>MMP8</i>  | 0.03837757   | Physical Interactions | Vastrik-Stein-2007     |
| <i>MMP15</i> | <i>MMP1</i>  | 0.025387421  | Physical Interactions | Vastrik-Stein-2007     |
| <i>MMP15</i> | <i>MMP3</i>  | 0.024070518  | Physical Interactions | Vastrik-Stein-2007     |
| <i>MMP15</i> | <i>MMP2</i>  | 0.027043989  | Physical Interactions | Vastrik-Stein-2007     |
| <i>MMP15</i> | <i>MMP9</i>  | 0.02963393   | Physical Interactions | Vastrik-Stein-2007     |
| <i>MMP15</i> | <i>MMP13</i> | 0.02886382   | Physical Interactions | Vastrik-Stein-2007     |
| <i>MMP12</i> | <i>MMP10</i> | 0.028728068  | Physical Interactions | Vastrik-Stein-2007     |

|       |       |             |                       |                    |
|-------|-------|-------------|-----------------------|--------------------|
| MMP12 | MMP11 | 0.028609017 | Physical Interactions | Vastrik-Stein-2007 |
| MMP12 | MMP14 | 0.022216644 | Physical Interactions | Vastrik-Stein-2007 |
| MMP12 | MMP15 | 0.032111358 | Physical Interactions | Vastrik-Stein-2007 |
| MMP19 | MMP8  | 0.022970373 | Physical Interactions | Vastrik-Stein-2007 |
| MMP19 | MMP1  | 0.015195295 | Physical Interactions | Vastrik-Stein-2007 |
| MMP19 | MMP3  | 0.014407081 | Physical Interactions | Vastrik-Stein-2007 |
| MMP19 | MMP2  | 0.016186813 | Physical Interactions | Vastrik-Stein-2007 |
| MMP19 | MMP9  | 0.017736986 | Physical Interactions | Vastrik-Stein-2007 |
| MMP19 | MMP10 | 0.027956305 | Physical Interactions | Vastrik-Stein-2007 |
| MMP19 | MMP11 | 0.027840454 | Physical Interactions | Vastrik-Stein-2007 |
| MMP19 | MMP13 | 0.017276047 | Physical Interactions | Vastrik-Stein-2007 |
| MMP19 | MMP14 | 0.021619808 | Physical Interactions | Vastrik-Stein-2007 |
| MMP19 | MMP15 | 0.031248705 | Physical Interactions | Vastrik-Stein-2007 |
| MMP19 | MMP12 | 0.019219816 | Physical Interactions | Vastrik-Stein-2007 |
| MMP7  | MMP1  | 0.01321268  | Physical Interactions | Vastrik-Stein-2007 |
| MMP7  | MMP3  | 0.012527309 | Physical Interactions | Vastrik-Stein-2007 |
| MMP7  | MMP2  | 0.014074829 | Physical Interactions | Vastrik-Stein-2007 |
| MMP7  | MMP10 | 0.02430869  | Physical Interactions | Vastrik-Stein-2007 |
| MMP7  | MMP11 | 0.024207955 | Physical Interactions | Vastrik-Stein-2007 |
| MMP7  | MMP14 | 0.018798953 | Physical Interactions | Vastrik-Stein-2007 |
| MMP7  | MMP15 | 0.027171515 | Physical Interactions | Vastrik-Stein-2007 |
| MMP7  | MMP19 | 0.01626314  | Physical Interactions | Vastrik-Stein-2007 |
| MMP3  | MMP1  | 0.01170476  | Physical Interactions | IREF-reactome      |
| MMP2  | MMP1  | 0.013150669 | Physical Interactions | IREF-reactome      |
| MMP2  | MMP3  | 0.012468514 | Physical Interactions | IREF-reactome      |
| MMP9  | MMP1  | 0.014410078 | Physical Interactions | IREF-reactome      |
| MMP10 | MMP8  | 0.034334067 | Physical Interactions | IREF-reactome      |
| MMP10 | MMP1  | 0.022712572 | Physical Interactions | IREF-reactome      |
| MMP10 | MMP3  | 0.021534419 | Physical Interactions | IREF-reactome      |
| MMP10 | MMP2  | 0.024194602 | Physical Interactions | IREF-reactome      |
| MMP10 | MMP9  | 0.026511664 | Physical Interactions | IREF-reactome      |
| MMP11 | MMP8  | 0.034191784 | Physical Interactions | IREF-reactome      |
| MMP11 | MMP1  | 0.022618448 | Physical Interactions | IREF-reactome      |
| MMP11 | MMP3  | 0.02144518  | Physical Interactions | IREF-reactome      |
| MMP11 | MMP2  | 0.02409434  | Physical Interactions | IREF-reactome      |
| MMP11 | MMP9  | 0.0264018   | Physical Interactions | IREF-reactome      |
| MMP13 | MMP3  | 0.013307539 | Physical Interactions | IREF-reactome      |
| MMP13 | MMP10 | 0.025822693 | Physical Interactions | IREF-reactome      |
| MMP13 | MMP11 | 0.025715683 | Physical Interactions | IREF-reactome      |
| MMP14 | MMP8  | 0.026552005 | Physical Interactions | IREF-reactome      |
| MMP14 | MMP1  | 0.017564604 | Physical Interactions | IREF-reactome      |
| MMP14 | MMP3  | 0.016653487 | Physical Interactions | IREF-reactome      |
| MMP14 | MMP2  | 0.018710723 | Physical Interactions | IREF-reactome      |
| MMP14 | MMP9  | 0.020502605 | Physical Interactions | IREF-reactome      |
| MMP14 | MMP13 | 0.019969795 | Physical Interactions | IREF-reactome      |
| MMP14 | MMP16 | 0.13556261  | Physical Interactions | IREF-reactome      |
| MMP15 | MMP8  | 0.03837757  | Physical Interactions | IREF-reactome      |

|              |              |             |                       |               |
|--------------|--------------|-------------|-----------------------|---------------|
| <i>MMP15</i> | <i>MMP1</i>  | 0.025387421 | Physical Interactions | IREF-reactome |
| <i>MMP15</i> | <i>MMP3</i>  | 0.024070518 | Physical Interactions | IREF-reactome |
| <i>MMP15</i> | <i>MMP2</i>  | 0.027043989 | Physical Interactions | IREF-reactome |
| <i>MMP15</i> | <i>MMP9</i>  | 0.02963393  | Physical Interactions | IREF-reactome |
| <i>MMP15</i> | <i>MMP13</i> | 0.02886382  | Physical Interactions | IREF-reactome |
| <i>MMP12</i> | <i>MMP10</i> | 0.028728068 | Physical Interactions | IREF-reactome |
| <i>MMP12</i> | <i>MMP11</i> | 0.028609017 | Physical Interactions | IREF-reactome |
| <i>MMP12</i> | <i>MMP14</i> | 0.022216644 | Physical Interactions | IREF-reactome |
| <i>MMP12</i> | <i>MMP15</i> | 0.032111358 | Physical Interactions | IREF-reactome |
| <i>MMP19</i> | <i>MMP8</i>  | 0.022970373 | Physical Interactions | IREF-reactome |
| <i>MMP19</i> | <i>MMP1</i>  | 0.015195295 | Physical Interactions | IREF-reactome |
| <i>MMP19</i> | <i>MMP3</i>  | 0.014407081 | Physical Interactions | IREF-reactome |
| <i>MMP19</i> | <i>MMP2</i>  | 0.016186813 | Physical Interactions | IREF-reactome |
| <i>MMP19</i> | <i>MMP9</i>  | 0.017736986 | Physical Interactions | IREF-reactome |
| <i>MMP19</i> | <i>MMP10</i> | 0.027956305 | Physical Interactions | IREF-reactome |
| <i>MMP19</i> | <i>MMP11</i> | 0.027840454 | Physical Interactions | IREF-reactome |
| <i>MMP19</i> | <i>MMP13</i> | 0.017276047 | Physical Interactions | IREF-reactome |
| <i>MMP19</i> | <i>MMP14</i> | 0.021619808 | Physical Interactions | IREF-reactome |
| <i>MMP19</i> | <i>MMP15</i> | 0.031248705 | Physical Interactions | IREF-reactome |
| <i>MMP19</i> | <i>MMP12</i> | 0.019219816 | Physical Interactions | IREF-reactome |
| <i>MMP7</i>  | <i>MMP1</i>  | 0.01321268  | Physical Interactions | IREF-reactome |
| <i>MMP7</i>  | <i>MMP3</i>  | 0.012527309 | Physical Interactions | IREF-reactome |
| <i>MMP7</i>  | <i>MMP2</i>  | 0.014074829 | Physical Interactions | IREF-reactome |
| <i>MMP7</i>  | <i>MMP10</i> | 0.02430869  | Physical Interactions | IREF-reactome |
| <i>MMP7</i>  | <i>MMP11</i> | 0.024207955 | Physical Interactions | IREF-reactome |
| <i>MMP7</i>  | <i>MMP14</i> | 0.018798953 | Physical Interactions | IREF-reactome |
| <i>MMP7</i>  | <i>MMP15</i> | 0.027171515 | Physical Interactions | IREF-reactome |
| <i>MMP7</i>  | <i>MMP19</i> | 0.01626314  | Physical Interactions | IREF-reactome |
| <i>MMP1</i>  | <i>MMP8</i>  | 0.13822381  | Predicted             | Wu-Stein-2010 |
| <i>MMP3</i>  | <i>MMP1</i>  | 0.07603955  | Predicted             | Wu-Stein-2010 |
| <i>MMP2</i>  | <i>MMP1</i>  | 0.029429162 | Predicted             | Wu-Stein-2010 |
| <i>MMP2</i>  | <i>MMP3</i>  | 0.030644799 | Predicted             | Wu-Stein-2010 |
| <i>MMP9</i>  | <i>MMP8</i>  | 0.06284516  | Predicted             | Wu-Stein-2010 |
| <i>MMP9</i>  | <i>MMP1</i>  | 0.033200886 | Predicted             | Wu-Stein-2010 |
| <i>MMP9</i>  | <i>MMP3</i>  | 0.034572322 | Predicted             | Wu-Stein-2010 |
| <i>MMP9</i>  | <i>MMP2</i>  | 0.013380332 | Predicted             | Wu-Stein-2010 |
| <i>MMP10</i> | <i>MMP9</i>  | 0.28006592  | Predicted             | Wu-Stein-2010 |
| <i>MMP11</i> | <i>MMP2</i>  | 0.15071048  | Predicted             | Wu-Stein-2010 |
| <i>MMP11</i> | <i>MMP9</i>  | 0.17002596  | Predicted             | Wu-Stein-2010 |
| <i>MMP13</i> | <i>MMP1</i>  | 0.08638272  | Predicted             | Wu-Stein-2010 |
| <i>MMP13</i> | <i>MMP3</i>  | 0.08995094  | Predicted             | Wu-Stein-2010 |
| <i>MMP13</i> | <i>MMP9</i>  | 0.03927497  | Predicted             | Wu-Stein-2010 |
| <i>MMP16</i> | <i>MMP2</i>  | 0.12822069  | Predicted             | Wu-Stein-2010 |
| <i>MMP16</i> | <i>MMP13</i> | 0.37636313  | Predicted             | Wu-Stein-2010 |
| <i>MMP24</i> | <i>MMP2</i>  | 0.25902104  | Predicted             | Wu-Stein-2010 |
| <i>MMP17</i> | <i>MMP2</i>  | 0.25902104  | Predicted             | Wu-Stein-2010 |
| <i>MMP14</i> | <i>MMP8</i>  | 0.10642476  | Predicted             | Wu-Stein-2010 |

|              |              |             |                     |               |
|--------------|--------------|-------------|---------------------|---------------|
| <i>MMP14</i> | <i>MMP3</i>  | 0.058546286 | Predicted           | Wu-Stein-2010 |
| <i>MMP14</i> | <i>MMP9</i>  | 0.025562862 | Predicted           | Wu-Stein-2010 |
| <i>MMP14</i> | <i>MMP13</i> | 0.066509955 | Predicted           | Wu-Stein-2010 |
| <i>MMP15</i> | <i>MMP2</i>  | 0.08224454  | Predicted           | Wu-Stein-2010 |
| <i>MMP15</i> | <i>MMP14</i> | 0.15712658  | Predicted           | Wu-Stein-2010 |
| <i>MMP25</i> | <i>MMP2</i>  | 0.115931414 | Predicted           | Wu-Stein-2010 |
| <i>MMP7</i>  | <i>MMP1</i>  | 0.10645419  | Predicted           | Wu-Stein-2010 |
| <i>MMP7</i>  | <i>MMP9</i>  | 0.04840071  | Predicted           | Wu-Stein-2010 |
| <i>CETP</i>  | <i>PLTP</i>  | 0.52145225  | Predicted           | Wu-Stein-2010 |
| <i>MMP26</i> | <i>MMP9</i>  | 0.061761584 | Predicted           | Wu-Stein-2010 |
| <i>MMP26</i> | <i>MMP7</i>  | 0.19803023  | Predicted           | Wu-Stein-2010 |
| <i>MMP1</i>  | <i>MMP8</i>  | 0.046538528 | Shared protein doma | INTERPRO      |
| <i>MMP3</i>  | <i>MMP8</i>  | 0.046538528 | Shared protein doma | INTERPRO      |
| <i>MMP3</i>  | <i>MMP1</i>  | 0.046538528 | Shared protein doma | INTERPRO      |
| <i>MMP2</i>  | <i>MMP8</i>  | 0.04035738  | Shared protein doma | INTERPRO      |
| <i>MMP2</i>  | <i>MMP1</i>  | 0.04035738  | Shared protein doma | INTERPRO      |
| <i>MMP2</i>  | <i>MMP3</i>  | 0.04035738  | Shared protein doma | INTERPRO      |
| <i>MMP9</i>  | <i>MMP8</i>  | 0.04035738  | Shared protein doma | INTERPRO      |
| <i>MMP9</i>  | <i>MMP1</i>  | 0.04035738  | Shared protein doma | INTERPRO      |
| <i>MMP9</i>  | <i>MMP3</i>  | 0.04035738  | Shared protein doma | INTERPRO      |
| <i>MMP9</i>  | <i>MMP2</i>  | 0.04305101  | Shared protein doma | INTERPRO      |
| <i>MMP10</i> | <i>MMP8</i>  | 0.043842833 | Shared protein doma | INTERPRO      |
| <i>MMP10</i> | <i>MMP1</i>  | 0.043842833 | Shared protein doma | INTERPRO      |
| <i>MMP10</i> | <i>MMP3</i>  | 0.043842833 | Shared protein doma | INTERPRO      |
| <i>MMP10</i> | <i>MMP2</i>  | 0.038019557 | Shared protein doma | INTERPRO      |
| <i>MMP10</i> | <i>MMP9</i>  | 0.038019557 | Shared protein doma | INTERPRO      |
| <i>MMP11</i> | <i>MMP8</i>  | 0.04295017  | Shared protein doma | INTERPRO      |
| <i>MMP11</i> | <i>MMP1</i>  | 0.04295017  | Shared protein doma | INTERPRO      |
| <i>MMP11</i> | <i>MMP3</i>  | 0.04295017  | Shared protein doma | INTERPRO      |
| <i>MMP11</i> | <i>MMP2</i>  | 0.037245277 | Shared protein doma | INTERPRO      |
| <i>MMP11</i> | <i>MMP9</i>  | 0.037245277 | Shared protein doma | INTERPRO      |
| <i>MMP11</i> | <i>MMP10</i> | 0.038830653 | Shared protein doma | INTERPRO      |
| <i>MMP13</i> | <i>MMP8</i>  | 0.046538528 | Shared protein doma | INTERPRO      |
| <i>MMP13</i> | <i>MMP1</i>  | 0.046538528 | Shared protein doma | INTERPRO      |
| <i>MMP13</i> | <i>MMP3</i>  | 0.046538528 | Shared protein doma | INTERPRO      |
| <i>MMP13</i> | <i>MMP2</i>  | 0.04035738  | Shared protein doma | INTERPRO      |
| <i>MMP13</i> | <i>MMP9</i>  | 0.04035738  | Shared protein doma | INTERPRO      |
| <i>MMP13</i> | <i>MMP10</i> | 0.043842833 | Shared protein doma | INTERPRO      |
| <i>MMP13</i> | <i>MMP11</i> | 0.04295017  | Shared protein doma | INTERPRO      |
| <i>MMP16</i> | <i>MMP8</i>  | 0.04567707  | Shared protein doma | INTERPRO      |
| <i>MMP16</i> | <i>MMP1</i>  | 0.04567707  | Shared protein doma | INTERPRO      |
| <i>MMP16</i> | <i>MMP3</i>  | 0.04567707  | Shared protein doma | INTERPRO      |
| <i>MMP16</i> | <i>MMP2</i>  | 0.039610337 | Shared protein doma | INTERPRO      |
| <i>MMP16</i> | <i>MMP9</i>  | 0.039610337 | Shared protein doma | INTERPRO      |
| <i>MMP16</i> | <i>MMP10</i> | 0.043031245 | Shared protein doma | INTERPRO      |
| <i>MMP16</i> | <i>MMP11</i> | 0.04215508  | Shared protein doma | INTERPRO      |
| <i>MMP16</i> | <i>MMP13</i> | 0.04567707  | Shared protein doma | INTERPRO      |

|       |       |             |                              |
|-------|-------|-------------|------------------------------|
| MMP24 | MMP8  | 0.041946262 | Shared protein doma INTERPRO |
| MMP24 | MMP1  | 0.041946262 | Shared protein doma INTERPRO |
| MMP24 | MMP3  | 0.041946262 | Shared protein doma INTERPRO |
| MMP24 | MMP2  | 0.036374882 | Shared protein doma INTERPRO |
| MMP24 | MMP9  | 0.036374882 | Shared protein doma INTERPRO |
| MMP24 | MMP10 | 0.038713504 | Shared protein doma INTERPRO |
| MMP24 | MMP11 | 0.03704605  | Shared protein doma INTERPRO |
| MMP24 | MMP13 | 0.041946262 | Shared protein doma INTERPRO |
| MMP24 | MMP16 | 0.049316004 | Shared protein doma INTERPRO |
| MMP17 | MMP8  | 0.039697845 | Shared protein doma INTERPRO |
| MMP17 | MMP1  | 0.039697845 | Shared protein doma INTERPRO |
| MMP17 | MMP3  | 0.039697845 | Shared protein doma INTERPRO |
| MMP17 | MMP2  | 0.034424905 | Shared protein doma INTERPRO |
| MMP17 | MMP9  | 0.034424905 | Shared protein doma INTERPRO |
| MMP17 | MMP10 | 0.042559948 | Shared protein doma INTERPRO |
| MMP17 | MMP11 | 0.03307544  | Shared protein doma INTERPRO |
| MMP17 | MMP13 | 0.039697845 | Shared protein doma INTERPRO |
| MMP17 | MMP16 | 0.03896296  | Shared protein doma INTERPRO |
| MMP17 | MMP24 | 0.041050196 | Shared protein doma INTERPRO |
| MMP14 | MMP8  | 0.04567707  | Shared protein doma INTERPRO |
| MMP14 | MMP1  | 0.04567707  | Shared protein doma INTERPRO |
| MMP14 | MMP3  | 0.04567707  | Shared protein doma INTERPRO |
| MMP14 | MMP2  | 0.039610337 | Shared protein doma INTERPRO |
| MMP14 | MMP9  | 0.039610337 | Shared protein doma INTERPRO |
| MMP14 | MMP10 | 0.043031245 | Shared protein doma INTERPRO |
| MMP14 | MMP11 | 0.04215508  | Shared protein doma INTERPRO |
| MMP14 | MMP13 | 0.04567707  | Shared protein doma INTERPRO |
| MMP14 | MMP16 | 0.05256368  | Shared protein doma INTERPRO |
| MMP14 | MMP24 | 0.049316004 | Shared protein doma INTERPRO |
| MMP14 | MMP17 | 0.03896296  | Shared protein doma INTERPRO |
| MMP15 | MMP8  | 0.04567707  | Shared protein doma INTERPRO |
| MMP15 | MMP1  | 0.04567707  | Shared protein doma INTERPRO |
| MMP15 | MMP3  | 0.04567707  | Shared protein doma INTERPRO |
| MMP15 | MMP2  | 0.039610337 | Shared protein doma INTERPRO |
| MMP15 | MMP9  | 0.039610337 | Shared protein doma INTERPRO |
| MMP15 | MMP10 | 0.043031245 | Shared protein doma INTERPRO |
| MMP15 | MMP11 | 0.04215508  | Shared protein doma INTERPRO |
| MMP15 | MMP13 | 0.04567707  | Shared protein doma INTERPRO |
| MMP15 | MMP16 | 0.05256368  | Shared protein doma INTERPRO |
| MMP15 | MMP24 | 0.049316004 | Shared protein doma INTERPRO |
| MMP15 | MMP17 | 0.03896296  | Shared protein doma INTERPRO |
| MMP15 | MMP14 | 0.05256368  | Shared protein doma INTERPRO |
| MMP21 | MMP8  | 0.039579045 | Shared protein doma INTERPRO |
| MMP21 | MMP1  | 0.039579045 | Shared protein doma INTERPRO |
| MMP21 | MMP3  | 0.039579045 | Shared protein doma INTERPRO |
| MMP21 | MMP2  | 0.034321886 | Shared protein doma INTERPRO |
| MMP21 | MMP9  | 0.034321886 | Shared protein doma INTERPRO |

|       |       |             |                              |
|-------|-------|-------------|------------------------------|
| MMP21 | MMP10 | 0.042432584 | Shared protein doma INTERPRO |
| MMP21 | MMP11 | 0.032976463 | Shared protein doma INTERPRO |
| MMP21 | MMP13 | 0.039579045 | Shared protein doma INTERPRO |
| MMP21 | MMP16 | 0.03884636  | Shared protein doma INTERPRO |
| MMP21 | MMP24 | 0.040927354 | Shared protein doma INTERPRO |
| MMP21 | MMP17 | 0.044993754 | Shared protein doma INTERPRO |
| MMP21 | MMP14 | 0.03884636  | Shared protein doma INTERPRO |
| MMP21 | MMP15 | 0.03884636  | Shared protein doma INTERPRO |
| MMP28 | MMP8  | 0.039577175 | Shared protein doma INTERPRO |
| MMP28 | MMP1  | 0.039577175 | Shared protein doma INTERPRO |
| MMP28 | MMP3  | 0.039577175 | Shared protein doma INTERPRO |
| MMP28 | MMP2  | 0.034320265 | Shared protein doma INTERPRO |
| MMP28 | MMP9  | 0.034320265 | Shared protein doma INTERPRO |
| MMP28 | MMP10 | 0.042430583 | Shared protein doma INTERPRO |
| MMP28 | MMP11 | 0.032974906 | Shared protein doma INTERPRO |
| MMP28 | MMP13 | 0.039577175 | Shared protein doma INTERPRO |
| MMP28 | MMP16 | 0.038844526 | Shared protein doma INTERPRO |
| MMP28 | MMP24 | 0.040925417 | Shared protein doma INTERPRO |
| MMP28 | MMP17 | 0.044991635 | Shared protein doma INTERPRO |
| MMP28 | MMP14 | 0.038844526 | Shared protein doma INTERPRO |
| MMP28 | MMP15 | 0.038844526 | Shared protein doma INTERPRO |
| MMP28 | MMP21 | 0.04485699  | Shared protein doma INTERPRO |
| MMP25 | MMP8  | 0.03709437  | Shared protein doma INTERPRO |
| MMP25 | MMP1  | 0.03709437  | Shared protein doma INTERPRO |
| MMP25 | MMP3  | 0.03709437  | Shared protein doma INTERPRO |
| MMP25 | MMP2  | 0.032167003 | Shared protein doma INTERPRO |
| MMP25 | MMP9  | 0.032167003 | Shared protein doma INTERPRO |
| MMP25 | MMP10 | 0.03976889  | Shared protein doma INTERPRO |
| MMP25 | MMP11 | 0.036435995 | Shared protein doma INTERPRO |
| MMP25 | MMP13 | 0.03709437  | Shared protein doma INTERPRO |
| MMP25 | MMP16 | 0.036407646 | Shared protein doma INTERPRO |
| MMP25 | MMP24 | 0.038358092 | Shared protein doma INTERPRO |
| MMP25 | MMP17 | 0.04216939  | Shared protein doma INTERPRO |
| MMP25 | MMP14 | 0.036407646 | Shared protein doma INTERPRO |
| MMP25 | MMP15 | 0.036407646 | Shared protein doma INTERPRO |
| MMP25 | MMP21 | 0.042043194 | Shared protein doma INTERPRO |
| MMP25 | MMP28 | 0.04204121  | Shared protein doma INTERPRO |
| MMP12 | MMP8  | 0.046538528 | Shared protein doma INTERPRO |
| MMP12 | MMP1  | 0.046538528 | Shared protein doma INTERPRO |
| MMP12 | MMP3  | 0.046538528 | Shared protein doma INTERPRO |
| MMP12 | MMP2  | 0.04035738  | Shared protein doma INTERPRO |
| MMP12 | MMP9  | 0.04035738  | Shared protein doma INTERPRO |
| MMP12 | MMP10 | 0.043842833 | Shared protein doma INTERPRO |
| MMP12 | MMP11 | 0.04295017  | Shared protein doma INTERPRO |
| MMP12 | MMP13 | 0.046538528 | Shared protein doma INTERPRO |
| MMP12 | MMP16 | 0.04567707  | Shared protein doma INTERPRO |
| MMP12 | MMP24 | 0.041946262 | Shared protein doma INTERPRO |



|       |       |             |                              |
|-------|-------|-------------|------------------------------|
| MMP12 | MMP17 | 0.039697845 | Shared protein doma INTERPRO |
| MMP12 | MMP14 | 0.04567707  | Shared protein doma INTERPRO |
| MMP12 | MMP15 | 0.04567707  | Shared protein doma INTERPRO |
| MMP12 | MMP21 | 0.039579045 | Shared protein doma INTERPRO |
| MMP12 | MMP28 | 0.039577175 | Shared protein doma INTERPRO |
| MMP12 | MMP25 | 0.03709437  | Shared protein doma INTERPRO |
| MMP27 | MMP8  | 0.039561167 | Shared protein doma INTERPRO |
| MMP27 | MMP1  | 0.039561167 | Shared protein doma INTERPRO |
| MMP27 | MMP3  | 0.039561167 | Shared protein doma INTERPRO |
| MMP27 | MMP2  | 0.034306385 | Shared protein doma INTERPRO |
| MMP27 | MMP9  | 0.034306385 | Shared protein doma INTERPRO |
| MMP27 | MMP10 | 0.04241342  | Shared protein doma INTERPRO |
| MMP27 | MMP11 | 0.03296157  | Shared protein doma INTERPRO |
| MMP27 | MMP13 | 0.039561167 | Shared protein doma INTERPRO |
| MMP27 | MMP16 | 0.038828816 | Shared protein doma INTERPRO |
| MMP27 | MMP24 | 0.04090887  | Shared protein doma INTERPRO |
| MMP27 | MMP17 | 0.044973437 | Shared protein doma INTERPRO |
| MMP27 | MMP14 | 0.038828816 | Shared protein doma INTERPRO |
| MMP27 | MMP15 | 0.038828816 | Shared protein doma INTERPRO |
| MMP27 | MMP21 | 0.04483885  | Shared protein doma INTERPRO |
| MMP27 | MMP28 | 0.044836733 | Shared protein doma INTERPRO |
| MMP27 | MMP25 | 0.042024206 | Shared protein doma INTERPRO |
| MMP27 | MMP12 | 0.039561167 | Shared protein doma INTERPRO |
| MMP19 | MMP8  | 0.039579045 | Shared protein doma INTERPRO |
| MMP19 | MMP1  | 0.039579045 | Shared protein doma INTERPRO |
| MMP19 | MMP3  | 0.039579045 | Shared protein doma INTERPRO |
| MMP19 | MMP2  | 0.034321886 | Shared protein doma INTERPRO |
| MMP19 | MMP9  | 0.034321886 | Shared protein doma INTERPRO |
| MMP19 | MMP10 | 0.042432584 | Shared protein doma INTERPRO |
| MMP19 | MMP11 | 0.032976463 | Shared protein doma INTERPRO |
| MMP19 | MMP13 | 0.039579045 | Shared protein doma INTERPRO |
| MMP19 | MMP16 | 0.03884636  | Shared protein doma INTERPRO |
| MMP19 | MMP24 | 0.040927354 | Shared protein doma INTERPRO |
| MMP19 | MMP17 | 0.044993754 | Shared protein doma INTERPRO |
| MMP19 | MMP14 | 0.03884636  | Shared protein doma INTERPRO |
| MMP19 | MMP15 | 0.03884636  | Shared protein doma INTERPRO |
| MMP19 | MMP21 | 0.04485911  | Shared protein doma INTERPRO |
| MMP19 | MMP28 | 0.04485699  | Shared protein doma INTERPRO |
| MMP19 | MMP25 | 0.042043194 | Shared protein doma INTERPRO |
| MMP19 | MMP12 | 0.039579045 | Shared protein doma INTERPRO |
| MMP19 | MMP27 | 0.04483885  | Shared protein doma INTERPRO |
| MMP20 | MMP8  | 0.03968172  | Shared protein doma INTERPRO |
| MMP20 | MMP1  | 0.03968172  | Shared protein doma INTERPRO |
| MMP20 | MMP3  | 0.03968172  | Shared protein doma INTERPRO |
| MMP20 | MMP2  | 0.034410927 | Shared protein doma INTERPRO |
| MMP20 | MMP9  | 0.034410927 | Shared protein doma INTERPRO |
| MMP20 | MMP10 | 0.042542666 | Shared protein doma INTERPRO |

|            |       |             |                              |
|------------|-------|-------------|------------------------------|
| MMP20      | MMP11 | 0.03306201  | Shared protein doma INTERPRO |
| MMP20      | MMP13 | 0.03968172  | Shared protein doma INTERPRO |
| MMP20      | MMP16 | 0.038947135 | Shared protein doma INTERPRO |
| MMP20      | MMP24 | 0.04103353  | Shared protein doma INTERPRO |
| MMP20      | MMP17 | 0.045110483 | Shared protein doma INTERPRO |
| MMP20      | MMP14 | 0.038947135 | Shared protein doma INTERPRO |
| MMP20      | MMP15 | 0.038947135 | Shared protein doma INTERPRO |
| MMP20      | MMP21 | 0.044975486 | Shared protein doma INTERPRO |
| MMP20      | MMP28 | 0.044973362 | Shared protein doma INTERPRO |
| MMP20      | MMP25 | 0.042152263 | Shared protein doma INTERPRO |
| MMP20      | MMP12 | 0.03968172  | Shared protein doma INTERPRO |
| MMP20      | MMP27 | 0.044955175 | Shared protein doma INTERPRO |
| MMP20      | MMP19 | 0.044975486 | Shared protein doma INTERPRO |
| MMP7       | MMP8  | 0.037511457 | Shared protein doma INTERPRO |
| MMP7       | MMP1  | 0.037511457 | Shared protein doma INTERPRO |
| MMP7       | MMP3  | 0.037511457 | Shared protein doma INTERPRO |
| MMP7       | MMP2  | 0.0325284   | Shared protein doma INTERPRO |
| MMP7       | MMP9  | 0.0325284   | Shared protein doma INTERPRO |
| MMP7       | MMP10 | 0.04021619  | Shared protein doma INTERPRO |
| MMP7       | MMP11 | 0.025982523 | Shared protein doma INTERPRO |
| MMP7       | MMP13 | 0.037511457 | Shared protein doma INTERPRO |
| MMP7       | MMP16 | 0.036816973 | Shared protein doma INTERPRO |
| MMP7       | MMP24 | 0.038789466 | Shared protein doma INTERPRO |
| MMP7       | MMP17 | 0.04264382  | Shared protein doma INTERPRO |
| MMP7       | MMP14 | 0.036816973 | Shared protein doma INTERPRO |
| MMP7       | MMP15 | 0.036816973 | Shared protein doma INTERPRO |
| MMP7       | MMP21 | 0.042516205 | Shared protein doma INTERPRO |
| MMP7       | MMP28 | 0.042514194 | Shared protein doma INTERPRO |
| MMP7       | MMP25 | 0.03706057  | Shared protein doma INTERPRO |
| MMP7       | MMP12 | 0.037511457 | Shared protein doma INTERPRO |
| MMP7       | MMP27 | 0.042497    | Shared protein doma INTERPRO |
| MMP7       | MMP19 | 0.042516205 | Shared protein doma INTERPRO |
| MMP7       | MMP20 | 0.0426265   | Shared protein doma INTERPRO |
| AC002094.3 | MMP8  | 0.027929543 | Shared protein doma INTERPRO |
| AC002094.3 | MMP1  | 0.027929543 | Shared protein doma INTERPRO |
| AC002094.3 | MMP3  | 0.027929543 | Shared protein doma INTERPRO |
| AC002094.3 | MMP2  | 0.024217188 | Shared protein doma INTERPRO |
| AC002094.3 | MMP9  | 0.024217188 | Shared protein doma INTERPRO |
| AC002094.3 | MMP10 | 0.029944472 | Shared protein doma INTERPRO |
| AC002094.3 | MMP11 | 0.033313278 | Shared protein doma INTERPRO |
| AC002094.3 | MMP13 | 0.027929543 | Shared protein doma INTERPRO |
| AC002094.3 | MMP16 | 0.02741216  | Shared protein doma INTERPRO |
| AC002094.3 | MMP24 | 0.028881663 | Shared protein doma INTERPRO |
| AC002094.3 | MMP17 | 0.031753026 | Shared protein doma INTERPRO |
| AC002094.3 | MMP14 | 0.02741216  | Shared protein doma INTERPRO |
| AC002094.3 | MMP15 | 0.02741216  | Shared protein doma INTERPRO |
| AC002094.3 | MMP21 | 0.031658    | Shared protein doma INTERPRO |

|            |            |             |                              |
|------------|------------|-------------|------------------------------|
| AC002094.3 | MMP28      | 0.031656504 | Shared protein doma INTERPRO |
| AC002094.3 | MMP25      | 0.034980737 | Shared protein doma INTERPRO |
| AC002094.3 | MMP12      | 0.027929543 | Shared protein doma INTERPRO |
| AC002094.3 | MMP27      | 0.031643704 | Shared protein doma INTERPRO |
| AC002094.3 | MMP19      | 0.031658    | Shared protein doma INTERPRO |
| AC002094.3 | MMP20      | 0.03174013  | Shared protein doma INTERPRO |
| CETP       | PLTP       | 0.09866344  | Shared protein doma INTERPRO |
| HPX        | MMP8       | 0.035150975 | Shared protein doma INTERPRO |
| HPX        | MMP1       | 0.035150975 | Shared protein doma INTERPRO |
| HPX        | MMP3       | 0.035150975 | Shared protein doma INTERPRO |
| HPX        | MMP2       | 0.0304804   | Shared protein doma INTERPRO |
| HPX        | MMP9       | 0.0304804   | Shared protein doma INTERPRO |
| HPX        | MMP10      | 0.02392443  | Shared protein doma INTERPRO |
| HPX        | MMP11      | 0.041924458 | Shared protein doma INTERPRO |
| HPX        | MMP13      | 0.035150975 | Shared protein doma INTERPRO |
| HPX        | MMP16      | 0.034500044 | Shared protein doma INTERPRO |
| HPX        | MMP24      | 0.036348853 | Shared protein doma INTERPRO |
| HPX        | MMP17      | 0.025369389 | Shared protein doma INTERPRO |
| HPX        | MMP14      | 0.034500044 | Shared protein doma INTERPRO |
| HPX        | MMP15      | 0.034500044 | Shared protein doma INTERPRO |
| HPX        | MMP21      | 0.02529347  | Shared protein doma INTERPRO |
| HPX        | MMP28      | 0.025292275 | Shared protein doma INTERPRO |
| HPX        | MMP25      | 0.0279482   | Shared protein doma INTERPRO |
| HPX        | MMP12      | 0.035150975 | Shared protein doma INTERPRO |
| HPX        | MMP27      | 0.025282046 | Shared protein doma INTERPRO |
| HPX        | MMP19      | 0.02529347  | Shared protein doma INTERPRO |
| HPX        | MMP20      | 0.025359085 | Shared protein doma INTERPRO |
| HPX        | AC002094.3 | 0.06355177  | Shared protein doma INTERPRO |
| MMP26      | MMP8       | 0.030236969 | Shared protein doma INTERPRO |
| MMP26      | MMP1       | 0.030236969 | Shared protein doma INTERPRO |
| MMP26      | MMP3       | 0.030236969 | Shared protein doma INTERPRO |
| MMP26      | MMP2       | 0.026219176 | Shared protein doma INTERPRO |
| MMP26      | MMP9       | 0.026219176 | Shared protein doma INTERPRO |
| MMP26      | MMP10      | 0.03241773  | Shared protein doma INTERPRO |
| MMP26      | MMP11      | 0.03606374  | Shared protein doma INTERPRO |
| MMP26      | MMP13      | 0.030236969 | Shared protein doma INTERPRO |
| MMP26      | MMP16      | 0.029677015 | Shared protein doma INTERPRO |
| MMP26      | MMP24      | 0.03126742  | Shared protein doma INTERPRO |
| MMP26      | MMP17      | 0.034375094 | Shared protein doma INTERPRO |
| MMP26      | MMP14      | 0.029677015 | Shared protein doma INTERPRO |
| MMP26      | MMP15      | 0.029677015 | Shared protein doma INTERPRO |
| MMP26      | MMP21      | 0.034272224 | Shared protein doma INTERPRO |
| MMP26      | MMP28      | 0.034270607 | Shared protein doma INTERPRO |
| MMP26      | MMP25      | 0.03786844  | Shared protein doma INTERPRO |
| MMP26      | MMP12      | 0.030236969 | Shared protein doma INTERPRO |
| MMP26      | MMP27      | 0.034256745 | Shared protein doma INTERPRO |
| MMP26      | MMP19      | 0.034272224 | Shared protein doma INTERPRO |

|       |       |             |                              |
|-------|-------|-------------|------------------------------|
| MMP26 | MMP20 | 0.034361135 | Shared protein doma INTERPRO |
| MMP26 | MMP7  | 0.045187496 | Shared protein doma INTERPRO |
| MMP1  | MMP8  | 0.044638466 | Shared protein doma PFAM     |
| MMP3  | MMP8  | 0.044638466 | Shared protein doma PFAM     |
| MMP3  | MMP1  | 0.044638466 | Shared protein doma PFAM     |
| MMP2  | MMP8  | 0.037137225 | Shared protein doma PFAM     |
| MMP2  | MMP1  | 0.037137225 | Shared protein doma PFAM     |
| MMP2  | MMP3  | 0.037137225 | Shared protein doma PFAM     |
| MMP9  | MMP8  | 0.037137225 | Shared protein doma PFAM     |
| MMP9  | MMP1  | 0.037137225 | Shared protein doma PFAM     |
| MMP9  | MMP3  | 0.037137225 | Shared protein doma PFAM     |
| MMP9  | MMP2  | 0.04289084  | Shared protein doma PFAM     |
| MMP10 | MMP8  | 0.044638466 | Shared protein doma PFAM     |
| MMP10 | MMP1  | 0.044638466 | Shared protein doma PFAM     |
| MMP10 | MMP3  | 0.044638466 | Shared protein doma PFAM     |
| MMP10 | MMP2  | 0.037137225 | Shared protein doma PFAM     |
| MMP10 | MMP9  | 0.037137225 | Shared protein doma PFAM     |
| MMP11 | MMP8  | 0.038203504 | Shared protein doma PFAM     |
| MMP11 | MMP1  | 0.038203504 | Shared protein doma PFAM     |
| MMP11 | MMP3  | 0.038203504 | Shared protein doma PFAM     |
| MMP11 | MMP2  | 0.03178301  | Shared protein doma PFAM     |
| MMP11 | MMP9  | 0.03178301  | Shared protein doma PFAM     |
| MMP11 | MMP10 | 0.038203504 | Shared protein doma PFAM     |
| MMP13 | MMP8  | 0.044638466 | Shared protein doma PFAM     |
| MMP13 | MMP1  | 0.044638466 | Shared protein doma PFAM     |
| MMP13 | MMP3  | 0.044638466 | Shared protein doma PFAM     |
| MMP13 | MMP2  | 0.037137225 | Shared protein doma PFAM     |
| MMP13 | MMP9  | 0.037137225 | Shared protein doma PFAM     |
| MMP13 | MMP10 | 0.044638466 | Shared protein doma PFAM     |
| MMP13 | MMP11 | 0.038203504 | Shared protein doma PFAM     |
| MMP16 | MMP8  | 0.042370785 | Shared protein doma PFAM     |
| MMP16 | MMP1  | 0.042370785 | Shared protein doma PFAM     |
| MMP16 | MMP3  | 0.042370785 | Shared protein doma PFAM     |
| MMP16 | MMP2  | 0.03525061  | Shared protein doma PFAM     |
| MMP16 | MMP9  | 0.03525061  | Shared protein doma PFAM     |
| MMP16 | MMP10 | 0.042370785 | Shared protein doma PFAM     |
| MMP16 | MMP11 | 0.036262486 | Shared protein doma PFAM     |
| MMP16 | MMP13 | 0.042370785 | Shared protein doma PFAM     |
| MMP24 | MMP8  | 0.042370785 | Shared protein doma PFAM     |
| MMP24 | MMP1  | 0.042370785 | Shared protein doma PFAM     |
| MMP24 | MMP3  | 0.042370785 | Shared protein doma PFAM     |
| MMP24 | MMP2  | 0.03525061  | Shared protein doma PFAM     |
| MMP24 | MMP9  | 0.03525061  | Shared protein doma PFAM     |
| MMP24 | MMP10 | 0.042370785 | Shared protein doma PFAM     |
| MMP24 | MMP11 | 0.036262486 | Shared protein doma PFAM     |
| MMP24 | MMP13 | 0.042370785 | Shared protein doma PFAM     |
| MMP24 | MMP16 | 0.06165466  | Shared protein doma PFAM     |

|       |       |             |                          |
|-------|-------|-------------|--------------------------|
| MMP17 | MMP8  | 0.044638466 | Shared protein doma PFAM |
| MMP17 | MMP1  | 0.044638466 | Shared protein doma PFAM |
| MMP17 | MMP3  | 0.044638466 | Shared protein doma PFAM |
| MMP17 | MMP2  | 0.037137225 | Shared protein doma PFAM |
| MMP17 | MMP9  | 0.037137225 | Shared protein doma PFAM |
| MMP17 | MMP10 | 0.044638466 | Shared protein doma PFAM |
| MMP17 | MMP11 | 0.038203504 | Shared protein doma PFAM |
| MMP17 | MMP13 | 0.044638466 | Shared protein doma PFAM |
| MMP17 | MMP16 | 0.042370785 | Shared protein doma PFAM |
| MMP17 | MMP24 | 0.042370785 | Shared protein doma PFAM |
| MMP14 | MMP8  | 0.042370785 | Shared protein doma PFAM |
| MMP14 | MMP1  | 0.042370785 | Shared protein doma PFAM |
| MMP14 | MMP3  | 0.042370785 | Shared protein doma PFAM |
| MMP14 | MMP2  | 0.03525061  | Shared protein doma PFAM |
| MMP14 | MMP9  | 0.03525061  | Shared protein doma PFAM |
| MMP14 | MMP10 | 0.042370785 | Shared protein doma PFAM |
| MMP14 | MMP11 | 0.036262486 | Shared protein doma PFAM |
| MMP14 | MMP13 | 0.042370785 | Shared protein doma PFAM |
| MMP14 | MMP16 | 0.06165466  | Shared protein doma PFAM |
| MMP14 | MMP24 | 0.06165466  | Shared protein doma PFAM |
| MMP14 | MMP17 | 0.042370785 | Shared protein doma PFAM |
| MMP15 | MMP8  | 0.042370785 | Shared protein doma PFAM |
| MMP15 | MMP1  | 0.042370785 | Shared protein doma PFAM |
| MMP15 | MMP3  | 0.042370785 | Shared protein doma PFAM |
| MMP15 | MMP2  | 0.03525061  | Shared protein doma PFAM |
| MMP15 | MMP9  | 0.03525061  | Shared protein doma PFAM |
| MMP15 | MMP10 | 0.042370785 | Shared protein doma PFAM |
| MMP15 | MMP11 | 0.036262486 | Shared protein doma PFAM |
| MMP15 | MMP13 | 0.042370785 | Shared protein doma PFAM |
| MMP15 | MMP16 | 0.06165466  | Shared protein doma PFAM |
| MMP15 | MMP24 | 0.06165466  | Shared protein doma PFAM |
| MMP15 | MMP17 | 0.042370785 | Shared protein doma PFAM |
| MMP15 | MMP14 | 0.06165466  | Shared protein doma PFAM |
| MMP21 | MMP8  | 0.044638466 | Shared protein doma PFAM |
| MMP21 | MMP1  | 0.044638466 | Shared protein doma PFAM |
| MMP21 | MMP3  | 0.044638466 | Shared protein doma PFAM |
| MMP21 | MMP2  | 0.037137225 | Shared protein doma PFAM |
| MMP21 | MMP9  | 0.037137225 | Shared protein doma PFAM |
| MMP21 | MMP10 | 0.044638466 | Shared protein doma PFAM |
| MMP21 | MMP11 | 0.038203504 | Shared protein doma PFAM |
| MMP21 | MMP13 | 0.044638466 | Shared protein doma PFAM |
| MMP21 | MMP16 | 0.042370785 | Shared protein doma PFAM |
| MMP21 | MMP24 | 0.042370785 | Shared protein doma PFAM |
| MMP21 | MMP17 | 0.044638466 | Shared protein doma PFAM |
| MMP21 | MMP14 | 0.042370785 | Shared protein doma PFAM |
| MMP21 | MMP15 | 0.042370785 | Shared protein doma PFAM |
| MMP28 | MMP8  | 0.044638466 | Shared protein doma PFAM |

|       |       |             |                          |
|-------|-------|-------------|--------------------------|
| MMP28 | MMP1  | 0.044638466 | Shared protein doma PFAM |
| MMP28 | MMP3  | 0.044638466 | Shared protein doma PFAM |
| MMP28 | MMP2  | 0.037137225 | Shared protein doma PFAM |
| MMP28 | MMP9  | 0.037137225 | Shared protein doma PFAM |
| MMP28 | MMP10 | 0.044638466 | Shared protein doma PFAM |
| MMP28 | MMP11 | 0.038203504 | Shared protein doma PFAM |
| MMP28 | MMP13 | 0.044638466 | Shared protein doma PFAM |
| MMP28 | MMP16 | 0.042370785 | Shared protein doma PFAM |
| MMP28 | MMP24 | 0.042370785 | Shared protein doma PFAM |
| MMP28 | MMP17 | 0.044638466 | Shared protein doma PFAM |
| MMP28 | MMP14 | 0.042370785 | Shared protein doma PFAM |
| MMP28 | MMP15 | 0.042370785 | Shared protein doma PFAM |
| MMP28 | MMP21 | 0.044638466 | Shared protein doma PFAM |
| MMP25 | MMP8  | 0.044638466 | Shared protein doma PFAM |
| MMP25 | MMP1  | 0.044638466 | Shared protein doma PFAM |
| MMP25 | MMP3  | 0.044638466 | Shared protein doma PFAM |
| MMP25 | MMP2  | 0.037137225 | Shared protein doma PFAM |
| MMP25 | MMP9  | 0.037137225 | Shared protein doma PFAM |
| MMP25 | MMP10 | 0.044638466 | Shared protein doma PFAM |
| MMP25 | MMP11 | 0.038203504 | Shared protein doma PFAM |
| MMP25 | MMP13 | 0.044638466 | Shared protein doma PFAM |
| MMP25 | MMP16 | 0.042370785 | Shared protein doma PFAM |
| MMP25 | MMP24 | 0.042370785 | Shared protein doma PFAM |
| MMP25 | MMP17 | 0.044638466 | Shared protein doma PFAM |
| MMP25 | MMP14 | 0.042370785 | Shared protein doma PFAM |
| MMP25 | MMP15 | 0.042370785 | Shared protein doma PFAM |
| MMP25 | MMP21 | 0.044638466 | Shared protein doma PFAM |
| MMP25 | MMP28 | 0.044638466 | Shared protein doma PFAM |
| MMP12 | MMP8  | 0.044638466 | Shared protein doma PFAM |
| MMP12 | MMP1  | 0.044638466 | Shared protein doma PFAM |
| MMP12 | MMP3  | 0.044638466 | Shared protein doma PFAM |
| MMP12 | MMP2  | 0.037137225 | Shared protein doma PFAM |
| MMP12 | MMP9  | 0.037137225 | Shared protein doma PFAM |
| MMP12 | MMP10 | 0.044638466 | Shared protein doma PFAM |
| MMP12 | MMP11 | 0.038203504 | Shared protein doma PFAM |
| MMP12 | MMP13 | 0.044638466 | Shared protein doma PFAM |
| MMP12 | MMP16 | 0.042370785 | Shared protein doma PFAM |
| MMP12 | MMP24 | 0.042370785 | Shared protein doma PFAM |
| MMP12 | MMP17 | 0.044638466 | Shared protein doma PFAM |
| MMP12 | MMP14 | 0.042370785 | Shared protein doma PFAM |
| MMP12 | MMP15 | 0.042370785 | Shared protein doma PFAM |
| MMP12 | MMP21 | 0.044638466 | Shared protein doma PFAM |
| MMP12 | MMP28 | 0.044638466 | Shared protein doma PFAM |
| MMP12 | MMP25 | 0.044638466 | Shared protein doma PFAM |
| MMP27 | MMP8  | 0.044638466 | Shared protein doma PFAM |
| MMP27 | MMP1  | 0.044638466 | Shared protein doma PFAM |
| MMP27 | MMP3  | 0.044638466 | Shared protein doma PFAM |

|       |       |             |                          |
|-------|-------|-------------|--------------------------|
| MMP27 | MMP2  | 0.037137225 | Shared protein doma PFAM |
| MMP27 | MMP9  | 0.037137225 | Shared protein doma PFAM |
| MMP27 | MMP10 | 0.044638466 | Shared protein doma PFAM |
| MMP27 | MMP11 | 0.038203504 | Shared protein doma PFAM |
| MMP27 | MMP13 | 0.044638466 | Shared protein doma PFAM |
| MMP27 | MMP16 | 0.042370785 | Shared protein doma PFAM |
| MMP27 | MMP24 | 0.042370785 | Shared protein doma PFAM |
| MMP27 | MMP17 | 0.044638466 | Shared protein doma PFAM |
| MMP27 | MMP14 | 0.042370785 | Shared protein doma PFAM |
| MMP27 | MMP15 | 0.042370785 | Shared protein doma PFAM |
| MMP27 | MMP21 | 0.044638466 | Shared protein doma PFAM |
| MMP27 | MMP28 | 0.044638466 | Shared protein doma PFAM |
| MMP27 | MMP25 | 0.044638466 | Shared protein doma PFAM |
| MMP27 | MMP12 | 0.044638466 | Shared protein doma PFAM |
| MMP19 | MMP8  | 0.044638466 | Shared protein doma PFAM |
| MMP19 | MMP1  | 0.044638466 | Shared protein doma PFAM |
| MMP19 | MMP3  | 0.044638466 | Shared protein doma PFAM |
| MMP19 | MMP2  | 0.037137225 | Shared protein doma PFAM |
| MMP19 | MMP9  | 0.037137225 | Shared protein doma PFAM |
| MMP19 | MMP10 | 0.044638466 | Shared protein doma PFAM |
| MMP19 | MMP11 | 0.038203504 | Shared protein doma PFAM |
| MMP19 | MMP13 | 0.044638466 | Shared protein doma PFAM |
| MMP19 | MMP16 | 0.042370785 | Shared protein doma PFAM |
| MMP19 | MMP24 | 0.042370785 | Shared protein doma PFAM |
| MMP19 | MMP17 | 0.044638466 | Shared protein doma PFAM |
| MMP19 | MMP14 | 0.042370785 | Shared protein doma PFAM |
| MMP19 | MMP15 | 0.042370785 | Shared protein doma PFAM |
| MMP19 | MMP21 | 0.044638466 | Shared protein doma PFAM |
| MMP19 | MMP28 | 0.044638466 | Shared protein doma PFAM |
| MMP19 | MMP25 | 0.044638466 | Shared protein doma PFAM |
| MMP19 | MMP12 | 0.044638466 | Shared protein doma PFAM |
| MMP19 | MMP27 | 0.044638466 | Shared protein doma PFAM |
| MMP20 | MMP8  | 0.044638466 | Shared protein doma PFAM |
| MMP20 | MMP1  | 0.044638466 | Shared protein doma PFAM |
| MMP20 | MMP3  | 0.044638466 | Shared protein doma PFAM |
| MMP20 | MMP2  | 0.037137225 | Shared protein doma PFAM |
| MMP20 | MMP9  | 0.037137225 | Shared protein doma PFAM |
| MMP20 | MMP10 | 0.044638466 | Shared protein doma PFAM |
| MMP20 | MMP11 | 0.038203504 | Shared protein doma PFAM |
| MMP20 | MMP13 | 0.044638466 | Shared protein doma PFAM |
| MMP20 | MMP16 | 0.042370785 | Shared protein doma PFAM |
| MMP20 | MMP24 | 0.042370785 | Shared protein doma PFAM |
| MMP20 | MMP17 | 0.044638466 | Shared protein doma PFAM |
| MMP20 | MMP14 | 0.042370785 | Shared protein doma PFAM |
| MMP20 | MMP15 | 0.042370785 | Shared protein doma PFAM |
| MMP20 | MMP21 | 0.044638466 | Shared protein doma PFAM |
| MMP20 | MMP28 | 0.044638466 | Shared protein doma PFAM |

|                   |              |             |                          |
|-------------------|--------------|-------------|--------------------------|
| <i>MMP20</i>      | <i>MMP25</i> | 0.044638466 | Shared protein doma PFAM |
| <i>MMP20</i>      | <i>MMP12</i> | 0.044638466 | Shared protein doma PFAM |
| <i>MMP20</i>      | <i>MMP27</i> | 0.044638466 | Shared protein doma PFAM |
| <i>MMP20</i>      | <i>MMP19</i> | 0.044638466 | Shared protein doma PFAM |
| <i>MMP7</i>       | <i>MMP8</i>  | 0.04232532  | Shared protein doma PFAM |
| <i>MMP7</i>       | <i>MMP1</i>  | 0.04232532  | Shared protein doma PFAM |
| <i>MMP7</i>       | <i>MMP3</i>  | 0.04232532  | Shared protein doma PFAM |
| <i>MMP7</i>       | <i>MMP2</i>  | 0.035212174 | Shared protein doma PFAM |
| <i>MMP7</i>       | <i>MMP9</i>  | 0.035212174 | Shared protein doma PFAM |
| <i>MMP7</i>       | <i>MMP10</i> | 0.04232532  | Shared protein doma PFAM |
| <i>MMP7</i>       | <i>MMP11</i> | 0.026986677 | Shared protein doma PFAM |
| <i>MMP7</i>       | <i>MMP13</i> | 0.04232532  | Shared protein doma PFAM |
| <i>MMP7</i>       | <i>MMP16</i> | 0.040174913 | Shared protein doma PFAM |
| <i>MMP7</i>       | <i>MMP24</i> | 0.040174913 | Shared protein doma PFAM |
| <i>MMP7</i>       | <i>MMP17</i> | 0.04232532  | Shared protein doma PFAM |
| <i>MMP7</i>       | <i>MMP14</i> | 0.040174913 | Shared protein doma PFAM |
| <i>MMP7</i>       | <i>MMP15</i> | 0.040174913 | Shared protein doma PFAM |
| <i>MMP7</i>       | <i>MMP21</i> | 0.04232532  | Shared protein doma PFAM |
| <i>MMP7</i>       | <i>MMP28</i> | 0.04232532  | Shared protein doma PFAM |
| <i>MMP7</i>       | <i>MMP25</i> | 0.04232532  | Shared protein doma PFAM |
| <i>MMP7</i>       | <i>MMP12</i> | 0.04232532  | Shared protein doma PFAM |
| <i>MMP7</i>       | <i>MMP27</i> | 0.04232532  | Shared protein doma PFAM |
| <i>MMP7</i>       | <i>MMP19</i> | 0.04232532  | Shared protein doma PFAM |
| <i>MMP7</i>       | <i>MMP20</i> | 0.04232532  | Shared protein doma PFAM |
| <i>AC002094.3</i> | <i>MMP8</i>  | 0.031686947 | Shared protein doma PFAM |
| <i>AC002094.3</i> | <i>MMP1</i>  | 0.031686947 | Shared protein doma PFAM |
| <i>AC002094.3</i> | <i>MMP3</i>  | 0.031686947 | Shared protein doma PFAM |
| <i>AC002094.3</i> | <i>MMP2</i>  | 0.026360147 | Shared protein doma PFAM |
| <i>AC002094.3</i> | <i>MMP9</i>  | 0.026360147 | Shared protein doma PFAM |
| <i>AC002094.3</i> | <i>MMP10</i> | 0.031686947 | Shared protein doma PFAM |
| <i>AC002094.3</i> | <i>MMP11</i> | 0.041484844 | Shared protein doma PFAM |
| <i>AC002094.3</i> | <i>MMP13</i> | 0.031686947 | Shared protein doma PFAM |
| <i>AC002094.3</i> | <i>MMP16</i> | 0.030076455 | Shared protein doma PFAM |
| <i>AC002094.3</i> | <i>MMP24</i> | 0.030076455 | Shared protein doma PFAM |
| <i>AC002094.3</i> | <i>MMP17</i> | 0.031686947 | Shared protein doma PFAM |
| <i>AC002094.3</i> | <i>MMP14</i> | 0.030076455 | Shared protein doma PFAM |
| <i>AC002094.3</i> | <i>MMP15</i> | 0.030076455 | Shared protein doma PFAM |
| <i>AC002094.3</i> | <i>MMP21</i> | 0.031686947 | Shared protein doma PFAM |
| <i>AC002094.3</i> | <i>MMP28</i> | 0.031686947 | Shared protein doma PFAM |
| <i>AC002094.3</i> | <i>MMP25</i> | 0.031686947 | Shared protein doma PFAM |
| <i>AC002094.3</i> | <i>MMP12</i> | 0.031686947 | Shared protein doma PFAM |
| <i>AC002094.3</i> | <i>MMP27</i> | 0.031686947 | Shared protein doma PFAM |
| <i>AC002094.3</i> | <i>MMP19</i> | 0.031686947 | Shared protein doma PFAM |
| <i>AC002094.3</i> | <i>MMP20</i> | 0.031686947 | Shared protein doma PFAM |
| <i>CETP</i>       | <i>PLTP</i>  | 0.09137102  | Shared protein doma PFAM |
| <i>HPX</i>        | <i>MMP8</i>  | 0.031686947 | Shared protein doma PFAM |
| <i>HPX</i>        | <i>MMP1</i>  | 0.031686947 | Shared protein doma PFAM |



|       |            |             |                          |
|-------|------------|-------------|--------------------------|
| HPX   | MMP3       | 0.031686947 | Shared protein doma PFAM |
| HPX   | MMP2       | 0.026360147 | Shared protein doma PFAM |
| HPX   | MMP9       | 0.026360147 | Shared protein doma PFAM |
| HPX   | MMP10      | 0.031686947 | Shared protein doma PFAM |
| HPX   | MMP11      | 0.041484844 | Shared protein doma PFAM |
| HPX   | MMP13      | 0.031686947 | Shared protein doma PFAM |
| HPX   | MMP16      | 0.030076455 | Shared protein doma PFAM |
| HPX   | MMP24      | 0.030076455 | Shared protein doma PFAM |
| HPX   | MMP17      | 0.031686947 | Shared protein doma PFAM |
| HPX   | MMP14      | 0.030076455 | Shared protein doma PFAM |
| HPX   | MMP15      | 0.030076455 | Shared protein doma PFAM |
| HPX   | MMP21      | 0.031686947 | Shared protein doma PFAM |
| HPX   | MMP28      | 0.031686947 | Shared protein doma PFAM |
| HPX   | MMP25      | 0.031686947 | Shared protein doma PFAM |
| HPX   | MMP12      | 0.031686947 | Shared protein doma PFAM |
| HPX   | MMP27      | 0.031686947 | Shared protein doma PFAM |
| HPX   | MMP19      | 0.031686947 | Shared protein doma PFAM |
| HPX   | MMP20      | 0.031686947 | Shared protein doma PFAM |
| HPX   | AC002094.3 | 0.0692488   | Shared protein doma PFAM |
| MMP26 | MMP8       | 0.03326784  | Shared protein doma PFAM |
| MMP26 | MMP1       | 0.03326784  | Shared protein doma PFAM |
| MMP26 | MMP3       | 0.03326784  | Shared protein doma PFAM |
| MMP26 | MMP2       | 0.027675318 | Shared protein doma PFAM |
| MMP26 | MMP9       | 0.027675318 | Shared protein doma PFAM |
| MMP26 | MMP10      | 0.03326784  | Shared protein doma PFAM |
| MMP26 | MMP11      | 0.043554474 | Shared protein doma PFAM |
| MMP26 | MMP13      | 0.03326784  | Shared protein doma PFAM |
| MMP26 | MMP16      | 0.031577017 | Shared protein doma PFAM |
| MMP26 | MMP24      | 0.031577017 | Shared protein doma PFAM |
| MMP26 | MMP17      | 0.03326784  | Shared protein doma PFAM |
| MMP26 | MMP14      | 0.031577017 | Shared protein doma PFAM |
| MMP26 | MMP15      | 0.031577017 | Shared protein doma PFAM |
| MMP26 | MMP21      | 0.03326784  | Shared protein doma PFAM |
| MMP26 | MMP28      | 0.03326784  | Shared protein doma PFAM |
| MMP26 | MMP25      | 0.03326784  | Shared protein doma PFAM |
| MMP26 | MMP12      | 0.03326784  | Shared protein doma PFAM |
| MMP26 | MMP27      | 0.03326784  | Shared protein doma PFAM |
| MMP26 | MMP19      | 0.03326784  | Shared protein doma PFAM |
| MMP26 | MMP20      | 0.03326784  | Shared protein doma PFAM |
| MMP26 | MMP7       | 0.04674424  | Shared protein doma PFAM |

ed genes in breast (functionality in breast) (GeneMANIA) (<http://genemania.org>)
