# Supplementary material for: Matrix Metalloproteinase Gene Polymorphisms Are Associated with Breast Cancer in the Caucasian Women of Russia
Source: MDPI journal article supplement (doi:10.3390/ijms232012638), 2022-10-20
Supplement: s1 [file s1]

Supplementary table S10 Effect of SNPs in high LD ( $r^2 \geq 0.80$ ) with the BC-associated polymorphisms of the *M* (according to Genotype-Tissue Expression (GTEx) (<http://www.gtexportal.org/>)) (  $p < 8.0E5$ ,  $FDR \leq 0.05$ )

| Chr | Lead SNP  | Position lead SNP(hg38) | Proxy SNP  | Position proxy SNP (hg38) | Distance (bp) between proxy and lead SNP | r <sup>2</sup> between lead and proxy | D between lead and proxy |
|-----|-----------|-------------------------|------------|---------------------------|------------------------------------------|---------------------------------------|--------------------------|
| 11  | rs679620  | 102827993               | rs526215   | 102807707                 | 20286                                    | 0.82                                  | -0.92                    |
| 11  | rs679620  | 102827993               | rs1144396  | 102808321                 | 19672                                    | 0.81                                  | -0.92                    |
| 11  | rs679620  | 102827993               | rs565082   | 102808927                 | 19066                                    | 0.82                                  | -0.92                    |
| 11  | rs679620  | 102827993               | rs502174   | 102811772                 | 16221                                    | 0.81                                  | -0.91                    |
| 11  | rs679620  | 102827993               | rs10791596 | 102816687                 | 11306                                    | 0.83                                  | -0.93                    |
| 11  | rs679620  | 102827993               | rs2097248  | 102819770                 | 8223                                     | 0.89                                  | -0.96                    |
| 11  | rs679620  | 102827993               | rs756544   | 102820431                 | 7562                                     | 0.9                                   | -0.96                    |
| 11  | rs679620  | 102827993               | rs12804136 | 102820659                 | 7334                                     | 0.91                                  | -0.97                    |
| 11  | rs679620  | 102827993               | rs11225434 | 102820751                 | 7242                                     | 0.9                                   | -0.97                    |
| 11  | rs679620  | 102827993               | rs7117013  | 102821493                 | 6500                                     | 0.91                                  | -0.97                    |
| 11  | rs679620  | 102827993               | rs10895364 | 102822132                 | 5861                                     | 0.91                                  | -0.97                    |
| 11  | rs679620  | 102827993               | rs12801529 | 102822879                 | 5114                                     | 0.92                                  | -0.98                    |
| 11  | rs679620  | 102827993               | rs10895365 | 102823462                 | 4531                                     | 0.92                                  | -0.98                    |
| 11  | rs679620  | 102827993               | rs6590993  | 102825487                 | 2506                                     | 0.89                                  | -0.96                    |
| 11  | rs679620  | 102827993               | rs6590994  | 102825901                 | 2092                                     | 0.92                                  | -0.98                    |
| 11  | rs679620  | 102827993               | rs10895366 | 102826358                 | 1635                                     | 0.96                                  | -0.98                    |
| 11  | rs679620  | 102827993               | rs7126392  | 102826390                 | 1603                                     | 0.96                                  | -0.98                    |
| 11  | rs679620  | 102827993               | rs2212637  | 102826825                 | 1168                                     | 0.94                                  | -0.97                    |
| 11  | rs679620  | 102827993               | rs12792871 | 102827605                 | 388                                      | 0.96                                  | -0.98                    |
| 11  | rs679620  | 102827993               | rs1010698  | 102830290                 | -2297                                    | 0.98                                  | -1                       |
| 11  | rs679620  | 102827993               | rs2155013  | 102831127                 | -3134                                    | 0.98                                  | -1                       |
| 11  | rs679620  | 102827993               | rs4754884  | 102831532                 | -3539                                    | 0.98                                  | -1                       |
| 11  | rs679620  | 102827993               | rs635746   | 102832897                 | -4904                                    | 0.99                                  | 1                        |
| 11  | rs679620  | 102827993               | rs633962   | 102833340                 | -5347                                    | 0.99                                  | 1                        |
| 11  | rs679620  | 102827993               | rs666734   | 102833449                 | -5456                                    | 0.99                                  | 1                        |
| 11  | rs679620  | 102827993               | rs595840   | 102834166                 | -6173                                    | 0.99                                  | 1                        |
| 11  | rs679620  | 102827993               | rs639752   | 102836608                 | -8615                                    | 0.99                                  | 1                        |
| 11  | rs679620  | 102827993               | rs575027   | 102837183                 | -9190                                    | 0.98                                  | 0.99                     |
| 11  | rs679620  | 102827993               | rs520540   | 102838694                 | -10701                                   | 0.98                                  | 0.99                     |
| 11  | rs679620  | 102827993               | rs591058   | 102840607                 | -12614                                   | 1                                     | 1                        |
| 11  | rs679620  | 102827993               | rs602128   | 102842734                 | -14741                                   | 1                                     | 1                        |
| 11  | rs679620  | 102827993               | rs679620   | 102842889                 | -14896                                   | 1                                     | 1                        |
| 11  | rs679620  | 102827993               | rs678815   | 102843046                 | -15053                                   | 1                                     | 1                        |
| 11  | rs679620  | 102827993               | rs617819   | 102843985                 | -15992                                   | 0.99                                  | 0.99                     |
| 11  | rs679620  | 102827993               | rs632478   | 102844950                 | -16957                                   | 0.99                                  | 0.99                     |
| 11  | rs679620  | 102827993               | rs645419   | 102845590                 | -17597                                   | 0.99                                  | 0.99                     |
| 20  | rs3918242 | 46007337                | rs1888235  | 45995328                  | 12009                                    | 0.95                                  | 0.98                     |

|    |           |          |           |          |      |      |      |
|----|-----------|----------|-----------|----------|------|------|------|
| 20 | rs3918242 | 46007337 | rs6073984 | 46002014 | 5323 | 0.95 | 0.98 |
|----|-----------|----------|-----------|----------|------|------|------|

|    |           |          |           |          |      |      |      |
|----|-----------|----------|-----------|----------|------|------|------|
| 20 | rs3918242 | 46007337 | rs6065912 | 46003728 | 3609 | 0.86 | 0.98 |
|----|-----------|----------|-----------|----------|------|------|------|

|    |           |          |           |          |     |   |   |
|----|-----------|----------|-----------|----------|-----|---|---|
| 20 | rs3918242 | 46007337 | rs3918241 | 46007096 | 241 | 1 | 1 |
|----|-----------|----------|-----------|----------|-----|---|---|

|    |           |          |           |          |       |      |   |
|----|-----------|----------|-----------|----------|-------|------|---|
| 20 | rs3918242 | 46007337 | rs2274755 | 46011053 | -3716 | 0.99 | 1 |
|----|-----------|----------|-----------|----------|-------|------|---|

|    |           |          |           |          |       |      |   |
|----|-----------|----------|-----------|----------|-------|------|---|
| 20 | rs3918242 | 46007337 | rs2236416 | 46011936 | -4599 | 0.99 | 1 |
|----|-----------|----------|-----------|----------|-------|------|---|

|    |           |          |         |          |       |      |   |
|----|-----------|----------|---------|----------|-------|------|---|
| 20 | rs3918242 | 46007337 | rs17577 | 46014472 | -7135 | 0.98 | 1 |
|----|-----------|----------|---------|----------|-------|------|---|

|    |           |          |           |          |       |      |   |
|----|-----------|----------|-----------|----------|-------|------|---|
| 20 | rs3918242 | 46007337 | rs3918261 | 46014953 | -7616 | 0.98 | 1 |
|----|-----------|----------|-----------|----------|-------|------|---|

|    |           |          |         |          |       |      |   |
|----|-----------|----------|---------|----------|-------|------|---|
| 20 | rs3918242 | 46007337 | rs13925 | 46016326 | -8989 | 0.98 | 1 |
|----|-----------|----------|---------|----------|-------|------|---|

|    |           |          |           |          |       |      |   |
|----|-----------|----------|-----------|----------|-------|------|---|
| 20 | rs3918242 | 46007337 | rs3918270 | 46016700 | -9363 | 0.96 | 1 |
|----|-----------|----------|-----------|----------|-------|------|---|

|    |           |          |           |          |       |      |      |
|----|-----------|----------|-----------|----------|-------|------|------|
| 20 | rs3918242 | 46007337 | rs3918271 | 46016954 | -9617 | 0.93 | 0.97 |
|----|-----------|----------|-----------|----------|-------|------|------|

|    |           |          |            |          |        |      |   |
|----|-----------|----------|------------|----------|--------|------|---|
| 20 | rs3918242 | 46007337 | rs66553311 | 46020003 | -12666 | 0.82 | 1 |
|----|-----------|----------|------------|----------|--------|------|---|

|    |           |          |            |          |        |      |      |
|----|-----------|----------|------------|----------|--------|------|------|
| 20 | rs3918242 | 46007337 | rs10432735 | 46021679 | -14342 | 0.89 | 0.98 |
|----|-----------|----------|------------|----------|--------|------|------|

|    |           |          |           |          |       |      |      |
|----|-----------|----------|-----------|----------|-------|------|------|
| 20 | rs3918249 | 46009497 | rs6017721 | 45987758 | 21739 | 0.83 | 0.94 |
|----|-----------|----------|-----------|----------|-------|------|------|

|    |           |          |           |          |      |      |      |
|----|-----------|----------|-----------|----------|------|------|------|
| 20 | rs3918249 | 46009497 | rs3848721 | 46005037 | 4460 | 0.94 | 0.99 |
|----|-----------|----------|-----------|----------|------|------|------|

|    |           |          |           |          |      |      |      |
|----|-----------|----------|-----------|----------|------|------|------|
| 20 | rs3918249 | 46009497 | rs3848722 | 46005181 | 4316 | 0.94 | 0.99 |
|----|-----------|----------|-----------|----------|------|------|------|

|    |           |          |           |          |      |     |      |
|----|-----------|----------|-----------|----------|------|-----|------|
| 20 | rs3918249 | 46009497 | rs4810482 | 46005911 | 3586 | 0.9 | 0.96 |
|----|-----------|----------|-----------|----------|------|-----|------|

|    |           |          |           |          |      |      |      |
|----|-----------|----------|-----------|----------|------|------|------|
| 20 | rs3918249 | 46009497 | rs3761158 | 46006273 | 3224 | 0.85 | 0.99 |
|----|-----------|----------|-----------|----------|------|------|------|

|              |                    |          |       |      |       |
|--------------|--------------------|----------|-------|------|-------|
| 20 rs3918249 | 46009497 rs3761159 | 46006318 | 3179  | 0.95 | 0.99  |
| 20 rs3918249 | 46009497 rs6065913 | 46006464 | 3033  | 0.99 | 0.99  |
| 20 rs3918249 | 46009497 rs3918240 | 46006977 | 2520  | 0.99 | 0.99  |
| 20 rs3918249 | 46009497 rs3918251 | 46010142 | -645  | 0.83 | 0.92  |
| 20 rs3918249 | 46009497 rs17576   | 46011586 | -2089 | 0.99 | 0.99  |
| 20 rs3918249 | 46009497 rs13969   | 46014194 | -4697 | 0.82 | -0.98 |
| 20 rs17576   | 46011586 rs6017721 | 45987758 | 23828 | 0.82 | 0.94  |
| 20 rs17576   | 46011586 rs3848721 | 46005037 | 6549  | 0.92 | 0.99  |
| 20 rs17576   | 46011586 rs3848722 | 46005181 | 6405  | 0.92 | 0.99  |
| 20 rs17576   | 46011586 rs4810482 | 46005911 | 5675  | 0.89 | 0.96  |
| 20 rs17576   | 46011586 rs3761158 | 46006273 | 5313  | 0.84 | 0.99  |
| 20 rs17576   | 46011586 rs3761159 | 46006318 | 5268  | 0.94 | 0.99  |
| 20 rs17576   | 46011586 rs6065913 | 46006464 | 5122  | 0.99 | 0.98  |

|              |                     |          |        |      |       |
|--------------|---------------------|----------|--------|------|-------|
| 20 rs17576   | 46011586 rs3918240  | 46006977 | 4609   | 0.99 | 0.98  |
| 20 rs17576   | 46011586 rs3918249  | 46009497 | 2089   | 0.99 | 0.99  |
| 20 rs17576   | 46011586 rs3918251  | 46010142 | 1444   | 0.84 | 0.93  |
| 20 rs17576   | 46011586 rs13969    | 46014194 | -2608  | 0.83 | -0.98 |
| 20 rs3787268 | 46013092 rs35610751 | 45991015 | 22077  | 0.87 | 0.94  |
| 20 rs3787268 | 46013092 rs6073980  | 45991065 | 22027  | 0.86 | 0.94  |
| 20 rs3787268 | 46013092 rs6073983  | 46001252 | 11840  | 0.89 | 0.98  |
| 20 rs3787268 | 46013092 rs3761157  | 46006183 | 6909   | 0.98 | 0.99  |
| 20 rs3787268 | 46013092 rs3918262  | 46015131 | -2039  | 1    | 1     |
| 20 rs3787268 | 46013092 rs6073989  | 46022571 | -9479  | 0.95 | 0.98  |
| 20 rs3787268 | 46013092 rs16991010 | 46023675 | -10583 | 0.95 | 0.98  |
| 20 rs3787268 | 46013092 rs6130998  | 46024480 | -11388 | 0.95 | 0.98  |
| 20 rs3787268 | 46013092 rs6130999  | 46026853 | -13761 | 0.95 | 0.98  |
| 20 rs3787268 | 46013092 rs6073991  | 46027473 | -14381 | 0.95 | 0.98  |
| 20 rs3787268 | 46013092 rs13039389 | 46031067 | -17975 | 0.91 | 0.97  |

|              |                    |          |        |      |      |
|--------------|--------------------|----------|--------|------|------|
| 20 rs3787268 | 46013092 rs6131001 | 46032717 | -19625 | 0.94 | 0.98 |
|--------------|--------------------|----------|--------|------|------|

|              |                    |          |        |      |      |
|--------------|--------------------|----------|--------|------|------|
| 20 rs2250889 | 46013767 rs6094239 | 46024910 | -11143 | 0.92 | 0.97 |
|--------------|--------------------|----------|--------|------|------|

|            |                    |          |       |      |      |
|------------|--------------------|----------|-------|------|------|
| 20 rs17577 | 46014472 rs1888235 | 45995328 | 19144 | 0.94 | 0.98 |
|------------|--------------------|----------|-------|------|------|

|            |                    |          |       |      |      |
|------------|--------------------|----------|-------|------|------|
| 20 rs17577 | 46014472 rs6073984 | 46002014 | 12458 | 0.94 | 0.98 |
|------------|--------------------|----------|-------|------|------|

|            |                    |          |       |      |      |
|------------|--------------------|----------|-------|------|------|
| 20 rs17577 | 46014472 rs6065912 | 46003728 | 10744 | 0.84 | 0.98 |
|------------|--------------------|----------|-------|------|------|

|            |                    |          |      |      |   |
|------------|--------------------|----------|------|------|---|
| 20 rs17577 | 46014472 rs3918241 | 46007096 | 7376 | 0.98 | 1 |
|------------|--------------------|----------|------|------|---|

|            |                    |          |      |      |   |
|------------|--------------------|----------|------|------|---|
| 20 rs17577 | 46014472 rs3918242 | 46007337 | 7135 | 0.98 | 1 |
|------------|--------------------|----------|------|------|---|

|            |                    |          |      |      |   |
|------------|--------------------|----------|------|------|---|
| 20 rs17577 | 46014472 rs2274755 | 46011053 | 3419 | 0.99 | 1 |
|------------|--------------------|----------|------|------|---|

|            |                    |          |      |      |   |
|------------|--------------------|----------|------|------|---|
| 20 rs17577 | 46014472 rs2236416 | 46011936 | 2536 | 0.99 | 1 |
|------------|--------------------|----------|------|------|---|

|            |                    |          |      |   |   |
|------------|--------------------|----------|------|---|---|
| 20 rs17577 | 46014472 rs3918261 | 46014953 | -481 | 1 | 1 |
|------------|--------------------|----------|------|---|---|

|            |                  |          |       |   |   |
|------------|------------------|----------|-------|---|---|
| 20 rs17577 | 46014472 rs13925 | 46016326 | -1854 | 1 | 1 |
|------------|------------------|----------|-------|---|---|

|            |                    |          |       |      |   |
|------------|--------------------|----------|-------|------|---|
| 20 rs17577 | 46014472 rs3918270 | 46016700 | -2228 | 0.98 | 1 |
|------------|--------------------|----------|-------|------|---|



|            |                    |          |       |      |      |
|------------|--------------------|----------|-------|------|------|
| 20 rs17577 | 46014472 rs3918271 | 46016954 | -2482 | 0.95 | 0.97 |
|------------|--------------------|----------|-------|------|------|

|            |                     |          |       |      |   |
|------------|---------------------|----------|-------|------|---|
| 20 rs17577 | 46014472 rs66553311 | 46020003 | -5531 | 0.84 | 1 |
|------------|---------------------|----------|-------|------|---|

|            |                     |          |       |      |      |
|------------|---------------------|----------|-------|------|------|
| 20 rs17577 | 46014472 rs10432735 | 46021679 | -7207 | 0.91 | 0.98 |
|------------|---------------------|----------|-------|------|------|

### 1MP genes on alternative splicing (cis-sQTL)

| Gene Symbol     | Intron Id | p                      | Effect Size ( $\beta$ ) | Tissue    |        |
|-----------------|-----------|------------------------|-------------------------|-----------|--------|
| ENSG00000100000 | WTAPP1    | 102832906              | 1.2E-34                 | -0.91     | Testis |
| ENSG00000100000 | WTAPP1    | 102832906              | 7.7E-36                 | -0.89     | Testis |
| ENSG00000100000 | WTAPP1    | 102832906              | 2.7E-37                 | -0.92     | Testis |
| ENSG00000100000 | WTAPP1    | 102832906              | 2.7E-37                 | -0.92     | Testis |
| ENSG00000100000 | WTAPP1    | 102832906              | 2.7E-37                 | -0.92     | Testis |
| ENSG00000100000 | WTAPP1    | 102832906              | 5.3E-40                 | -0.95     | Testis |
| ENSG00000100000 | WTAPP1    | 102832906              | 5E-39                   | -0.95     | Testis |
| ENSG00000100000 | WTAPP1    | 102832906              | 1E-37                   | -0.93     | Testis |
| ENSG00000100000 | WTAPP1    | 102832906              | 1.5E-40                 | -0.96     | Testis |
| ENSG00000100000 | WTAPP1    | 102832906              | 6.3E-39                 | -0.94     | Testis |
| ENSG00000100000 | WTAPP1    | 102832906              | 6.3E-39                 | -0.94     | Testis |
| ENSG00000100000 | WTAPP1    | 102832906              | 2.5E-40                 | -0.96     | Testis |
| ENSG00000100000 | WTAPP1    | 102832906              | 4.7E-40                 | -0.96     | Testis |
| ENSG00000100000 | WTAPP1    | 102832906              | 1.1E-39                 | -0.96     | Testis |
| ENSG00000100000 | WTAPP1    | 102832906              | 1.1E-39                 | -0.96     | Testis |
| ENSG00000100000 | WTAPP1    | 102832906              | 1.2E-38                 | -0.93     | Testis |
| ENSG00000100000 | WTAPP1    | 102832906              | 4.5E-41                 | -0.95     | Testis |
| ENSG00000100000 | WTAPP1    | 102832906              | 5.3E-40                 | -0.93     | Testis |
| ENSG00000100000 | WTAPP1    | 102832906              | 1.2E-38                 | -0.93     | Testis |
| ENSG00000100000 | WTAPP1    | 102832906              | 9.3E-42                 | -0.96     | Testis |
| ENSG00000100000 | WTAPP1    | 102832906              | 3.8E-42                 | -0.96     | Testis |
| ENSG00000100000 | WTAPP1    | 102832906              | 3.8E-42                 | -0.96     | Testis |
| ENSG00000100000 | WTAPP1    | 102832906              | 6.7E-43                 | 0.96      | Testis |
| ENSG00000100000 | WTAPP1    | 102832906              | 2E-41                   | 0.95      | Testis |
| ENSG00000100000 | WTAPP1    | 102832906              | 6.7E-43                 | 0.96      | Testis |
| ENSG00000100000 | WTAPP1    | 102832906              | 1.1E-40                 | 0.94      | Testis |
| ENSG00000100000 | WTAPP1    | 102832906              | 2E-41                   | 0.95      | Testis |
| ENSG00000100000 | WTAPP1    | 102832906              | 2E-41                   | 0.95      | Testis |
| ENSG00000100000 | WTAPP1    | 102832906              | 6.7E-43                 | 0.96      | Testis |
| ENSG00000100000 | WTAPP1    | 102832906              | 1.4E-41                 | 0.95      | Testis |
| ENSG00000100000 | WTAPP1    | 102832906              | 3.4E-43                 | 0.97      | Testis |
| ENSG00000100000 | WTAPP1    | 102832906              | 7.5E-41                 | 0.94      | Testis |
| ENSG00000100000 | WTAPP1    | 102832906              | 1.9E-41                 | 0.95      | Testis |
| ENSG00000100000 | WTAPP1    | 102832906              | 7.5E-41                 | 0.94      | Testis |
| ENSG00000100000 | WTAPP1    | 102832906              | 1.9E-41                 | 0.95      | Testis |
| ENSG00000100000 | WTAPP1    | 102832906              | 1.9E-41                 | 0.95      | Testis |
| ENSG00000100000 | CD40      | 46126741:0.00000000096 | 0.47                    | Lung      |        |
| ENSG00000100000 | CD40      | 46126741:0.00000000096 | 0.47                    | Lung      |        |
| ENSG00000100000 | CD40      | 46126741:0.0000000038  | 0.51                    | Thyroid   |        |
| ENSG00000100000 | SLC12A5   | 46021886:0.000000018   | 0.78                    | Pituitary |        |

|                |           |              |       |                                     |
|----------------|-----------|--------------|-------|-------------------------------------|
| ENSG0000010240 | 46126741: | 0.00000018   | 0.51  | Artery - Aorta                      |
| ENSG0000010240 | 45841956: | 0.00000037   | 0.61  | Heart - Left Ventricle              |
| ENSG0000010240 | 46126741: | 0.00000076   | 0.76  | Cells - EBV-transformed lymphocytes |
| ENSG0000010240 | 46126741: | 0.00000012   | 0.36  | Adipose - Subcutaneous              |
| ENSG0000010240 | 46126741: | 0.00000017   | 0.41  | Adipose - Visceral (Omentum)        |
| ENSG0000010240 | 46126741: | 0.00000017   | 0.41  | Adipose - Visceral (Omentum)        |
| ENSG0000010240 | 46126741: | 0.00000035   | 0.39  | Nerve - Tibial                      |
| ENSG0000010240 | 46126741: | 0.0000000096 | 0.47  | Lung                                |
| ENSG0000010240 | 46126741: | 0.0000000096 | 0.47  | Lung                                |
| ENSG0000010240 | 46126741: | 0.0000000043 | 0.51  | Thyroid                             |
| ENSG0000010240 | 46021886: | 0.0000000018 | 0.78  | Pituitary                           |
| ENSG0000010240 | 46126741: | 0.000000018  | 0.51  | Artery - Aorta                      |
| ENSG0000010240 | 45841956: | 0.000000049  | 0.61  | Heart - Left Ventricle              |
| ENSG0000010240 | 46126741: | 0.000000076  | 0.76  | Cells - EBV-transformed lymphocytes |
| ENSG0000010240 | 46126741: | 0.000000015  | 0.35  | Adipose - Subcutaneous              |
| ENSG0000010240 | 46126741: | 0.000000017  | 0.41  | Adipose - Visceral (Omentum)        |
| ENSG0000010240 | 46126741: | 0.000000017  | 0.41  | Adipose - Visceral (Omentum)        |
| ENSG0000010240 | 46126741: | 0.000000035  | 0.39  | Nerve - Tibial                      |
| ENSG0000010240 | 46126741: | 0.0000000028 | 0.52  | Lung                                |
| ENSG0000010240 | 46126741: | 0.0000000028 | 0.52  | Lung                                |
| ENSG0000010240 | 46126741: | 0.0000000011 | 0.55  | Thyroid                             |
| ENSG0000010240 | 46126741: | 0.0000000011 | 0.58  | Artery - Aorta                      |
| ENSG0000010240 | 45841956: | 0.0000000024 | 0.69  | Heart - Left Ventricle              |
| ENSG0000010240 | 46021886: | 0.000000004  | 0.78  | Pituitary                           |
| ENSG0000010240 | 45841956: | 0.0000000059 | 0.62  | Heart - Atrial Appendage            |
| ENSG0000010240 | 46126741: | 0.0000000062 | 0.88  | Cells - EBV-transformed lymphocytes |
| ENSG0000010240 | 46126741: | 0.0000000046 | 0.45  | Adipose - Visceral (Omentum)        |
| ENSG0000010240 | 46126741: | 0.0000000046 | 0.45  | Adipose - Visceral (Omentum)        |
| ENSG0000010240 | 46126741: | 0.0000000062 | 0.38  | Adipose - Subcutaneous              |
| ENSG0000010240 | 46126741: | 0.000000007  | 0.43  | Nerve - Tibial                      |
| ENSG0000010240 | 46023071: | 0.0000000045 | -0.47 | Lung                                |
| ENSG0000010240 | 46126741: | 0.0000000096 | 0.47  | Lung                                |
| ENSG0000010240 | 46126741: | 0.0000000096 | 0.47  | Lung                                |
| ENSG0000010240 | 46126741: | 0.0000000043 | 0.51  | Thyroid                             |
| ENSG0000010240 | 46021886: | 0.0000000018 | 0.78  | Pituitary                           |
| ENSG0000010240 | 46126741: | 0.000000018  | 0.51  | Artery - Aorta                      |
| ENSG0000010240 | 45841956: | 0.000000049  | 0.61  | Heart - Left Ventricle              |
| ENSG0000010240 | 46126741: | 0.000000076  | 0.76  | Cells - EBV-transformed lymphocytes |
| ENSG0000010240 | 46126741: | 0.000000015  | 0.35  | Adipose - Subcutaneous              |
| ENSG0000010240 | 46126741: | 0.000000017  | 0.41  | Adipose - Visceral (Omentum)        |
| ENSG0000010240 | 46126741: | 0.000000017  | 0.41  | Adipose - Visceral (Omentum)        |
| ENSG0000010240 | 46126741: | 0.000000035  | 0.39  | Nerve - Tibial                      |
| ENSG0000010240 | 46021886: | 0.0000000026 | 0.86  | Pituitary                           |
| ENSG0000010240 | 46126741: | 0.0000000065 | 0.45  | Lung                                |
| ENSG0000010240 | 46126741: | 0.0000000065 | 0.45  | Lung                                |
| ENSG0000010240 | 46126741: | 0.0000000015 | 0.47  | Thyroid                             |
| ENSG0000010240 | 46126741: | 0.000000002  | 0.5   | Artery - Aorta                      |

|                   |           |                |       |                                     |
|-------------------|-----------|----------------|-------|-------------------------------------|
| ENSG000001ACOT8   | 45841956: | 0.00000066     | 0.59  | Heart - Left Ventricle              |
| ENSG000001CD40    | 46126741: | 0.00000092     | 0.76  | Cells - EBV-transformed lymphocytes |
| ENSG000001SLC12A5 | 46023071: | 0.00000012     | -0.43 | Brain - Cerebellar Hemisphere       |
| ENSG000001ACOT8   | 45841956: | 0.00000025     | 0.49  | Heart - Atrial Appendage            |
| ENSG000001SLC12A5 | 46021886: | 0.0000000058   | 0.79  | Pituitary                           |
| ENSG000001CD40    | 46126741: | 0.0000000067   | 0.45  | Lung                                |
| ENSG000001CD40    | 46126741: | 0.0000000067   | 0.45  | Lung                                |
| ENSG000001CD40    | 46126741: | 0.0000000022   | 0.47  | Thyroid                             |
| ENSG000001CD40    | 46126741: | 0.000000046    | 0.78  | Cells - EBV-transformed lymphocytes |
| ENSG000001CD40    | 46126741: | 0.000000053    | 0.49  | Artery - Aorta                      |
| ENSG000001ACOT8   | 45841956: | 0.00000015     | 0.58  | Heart - Left Ventricle              |
| ENSG000001ACOT8   | 45841956: | 0.00000039     | 0.49  | Heart - Atrial Appendage            |
| ENSG000001SLC12A5 | 46023071: | 0.00000018     | -0.42 | Lung                                |
| ENSG000001SLC12A5 | 46021886: | 0.00000000011  | 0.88  | Pituitary                           |
| ENSG000001CD40    | 46126741: | 0.0000000006   | 0.45  | Lung                                |
| ENSG000001CD40    | 46126741: | 0.0000000006   | 0.45  | Lung                                |
| ENSG000001CD40    | 46126741: | 0.0000000043   | 0.46  | Thyroid                             |
| ENSG000001CD40    | 46126741: | 0.000000038    | 0.49  | Artery - Aorta                      |
| ENSG000001CD40    | 46126741: | 0.000000092    | 0.76  | Cells - EBV-transformed lymphocytes |
| ENSG000001SLC12A5 | 46023071: | 0.00000012     | -0.43 | Brain - Cerebellar Hemisphere       |
| ENSG000001ACOT8   | 45841956: | 0.00000018     | 0.56  | Heart - Left Ventricle              |
| ENSG000001ACOT8   | 45841956: | 0.00000021     | 0.49  | Heart - Atrial Appendage            |
| ENSG000001SLC12A5 | 46023071: | 0.00000017     | -0.41 | Lung                                |
| ENSG000001SLC12A5 | 46021886: | 0.00000000011  | 0.88  | Pituitary                           |
| ENSG000001CD40    | 46126741: | 0.0000000027   | 0.42  | Lung                                |
| ENSG000001CD40    | 46126741: | 0.0000000027   | 0.42  | Lung                                |
| ENSG000001CD40    | 46126741: | 0.0000000067   | 0.45  | Thyroid                             |
| ENSG000001CD40    | 46126741: | 0.000000055    | 0.47  | Artery - Aorta                      |
| ENSG000001ACOT8   | 45841956: | 0.000000085    | 0.58  | Heart - Left Ventricle              |
| ENSG000001SLC12A5 | 46023071: | 0.00000012     | -0.43 | Brain - Cerebellar Hemisphere       |
| ENSG000001CD40    | 46126741: | 0.00000023     | 0.73  | Cells - EBV-transformed lymphocytes |
| ENSG000001ACOT8   | 45841956: | 0.00000036     | 0.48  | Heart - Atrial Appendage            |
| ENSG000001SLC12A5 | 46021886: | 0.0000000002   | 0.82  | Pituitary                           |
| ENSG000001CD40    | 46126741: | 0.0000000011   | 0.44  | Lung                                |
| ENSG000001CD40    | 46126741: | 0.0000000011   | 0.44  | Lung                                |
| ENSG000001CD40    | 46126741: | 0.0000000012   | 0.48  | Thyroid                             |
| ENSG000001CD40    | 46126741: | 0.000000004    | 0.49  | Artery - Aorta                      |
| ENSG000001CD40    | 46126741: | 0.000000092    | 0.76  | Cells - EBV-transformed lymphocytes |
| ENSG000001ACOT8   | 45841956: | 0.00000012     | 0.58  | Heart - Left Ventricle              |
| ENSG000001ACOT8   | 45841956: | 0.00000018     | 0.5   | Heart - Atrial Appendage            |
| ENSG000001SLC12A5 | 46023071: | 0.0000002      | -0.41 | Lung                                |
| ENSG000001SLC12A5 | 46021886: | 0.000000000026 | 0.86  | Pituitary                           |
| ENSG000001CD40    | 46126741: | 0.0000000018   | 0.43  | Lung                                |
| ENSG000001CD40    | 46126741: | 0.0000000018   | 0.43  | Lung                                |
| ENSG000001CD40    | 46126741: | 0.0000000032   | 0.46  | Thyroid                             |
| ENSG000001CD40    | 46126741: | 0.000000032    | 0.48  | Artery - Aorta                      |
| ENSG000001ACOT8   | 45841956: | 0.00000007     | 0.58  | Heart - Left Ventricle              |

|                 |         |           |                |       |                                     |
|-----------------|---------|-----------|----------------|-------|-------------------------------------|
| ENSG00000100000 | CD40    | 46126741: | 0.00000092     | 0.76  | Cells - EBV-transformed lymphocytes |
| ENSG00000100000 | SLC12A5 | 46023071: | 0.0000012      | -0.43 | Brain - Cerebellar Hemisphere       |
| ENSG00000100000 | ACOT8   | 45841956: | 0.0000021      | 0.49  | Heart - Atrial Appendage            |
| ENSG00000100000 | SLC12A5 | 46021886: | 0.00000000026  | 0.86  | Pituitary                           |
| ENSG00000100000 | CD40    | 46126741: | 0.0000000065   | 0.45  | Lung                                |
| ENSG00000100000 | CD40    | 46126741: | 0.0000000065   | 0.45  | Lung                                |
| ENSG00000100000 | CD40    | 46126741: | 0.0000000032   | 0.46  | Thyroid                             |
| ENSG00000100000 | CD40    | 46126741: | 0.000000038    | 0.49  | Artery - Aorta                      |
| ENSG00000100000 | ACOT8   | 45841956: | 0.00000007     | 0.58  | Heart - Left Ventricle              |
| ENSG00000100000 | CD40    | 46126741: | 0.00000092     | 0.76  | Cells - EBV-transformed lymphocytes |
| ENSG00000100000 | SLC12A5 | 46023071: | 0.0000012      | -0.43 | Brain - Cerebellar Hemisphere       |
| ENSG00000100000 | ACOT8   | 45841956: | 0.0000021      | 0.49  | Heart - Atrial Appendage            |
| ENSG00000100000 | SLC12A5 | 46021886: | 0.000000000000 | 0.98  | Pituitary                           |
| ENSG00000100000 | SLC12A5 | 46021886: | 0.000000000000 | 0.99  | Brain - Cerebellum                  |
| ENSG00000100000 | SLC12A5 | 46021886: | 0.000000000000 | 0.74  | Testis                              |
| ENSG00000100000 | SLC12A5 | 46023071: | 0.000000000000 | -0.57 | Brain - Cerebellar Hemisphere       |
| ENSG00000100000 | SLC12A5 | 46023071: | 0.00000000017  | -0.69 | Brain - Cortex                      |
| ENSG00000100000 | SLC12A5 | 46021886: | 0.00000097     | 0.43  | Adipose - Visceral (Omentum)        |
| ENSG00000100000 | CD40    | 46126741: | 0.00000013     | 0.36  | Thyroid                             |
| ENSG00000100000 | SLC35C2 | 46357702: | 0.0000024      | 0.61  | Brain - Cerebellum                  |
| ENSG00000100000 | ACOT8   | 45841956: | 0.0000003      | 0.48  | Heart - Left Ventricle              |
| ENSG00000100000 | SLC12A5 | 46021886: | 0.00000000026  | 0.86  | Pituitary                           |
| ENSG00000100000 | CD40    | 46126741: | 0.0000000065   | 0.45  | Lung                                |
| ENSG00000100000 | CD40    | 46126741: | 0.0000000065   | 0.45  | Lung                                |
| ENSG00000100000 | CD40    | 46126741: | 0.0000000032   | 0.46  | Thyroid                             |
| ENSG00000100000 | CD40    | 46126741: | 0.000000038    | 0.49  | Artery - Aorta                      |
| ENSG00000100000 | ACOT8   | 45841956: | 0.00000007     | 0.58  | Heart - Left Ventricle              |
| ENSG00000100000 | CD40    | 46126741: | 0.00000092     | 0.76  | Cells - EBV-transformed lymphocytes |
| ENSG00000100000 | SLC12A5 | 46023071: | 0.0000012      | -0.43 | Brain - Cerebellar Hemisphere       |
| ENSG00000100000 | ACOT8   | 45841956: | 0.0000021      | 0.49  | Heart - Atrial Appendage            |
|                 |         |           |                |       |                                     |
| ENSG00000100000 | SLC12A5 | 46021886: | 0.000000000000 | 0.64  | Pituitary                           |
| ENSG00000100000 | SLC12A5 | 46021886: | 0.00000000048  | 0.48  | Testis                              |
| ENSG00000100000 | SLC12A5 | 46021886: | 0.0000000039   | 0.5   | Brain - Cerebellum                  |
| ENSG00000100000 | SLC12A5 | 46023071: | 0.0000000041   | -0.46 | Brain - Cortex                      |
| ENSG00000100000 | SLC12A5 | 46023071: | 0.00000014     | -0.3  | Brain - Cerebellar Hemisphere       |
| ENSG00000100000 | SLC12A5 | 46021886: | 0.0000000002   | 0.58  | Pituitary                           |
| ENSG00000100000 | SLC12A5 | 46023071: | 0.00000013     | -0.42 | Brain - Cortex                      |
| ENSG00000100000 | SLC12A5 | 46021886: | 0.00000000004  | 0.59  | Pituitary                           |
| ENSG00000100000 | SLC12A5 | 46021886: | 0.0000000075   | 0.45  | Testis                              |
| ENSG00000100000 | SLC12A5 | 46021886: | 0.000000068    | 0.59  | Brain - Substantia nigra            |
| ENSG00000100000 | SLC12A5 | 46023071: | 0.000000079    | -0.42 | Brain - Cortex                      |
| ENSG00000100000 | SLC12A5 | 46021886: | 0.000000000007 | 0.61  | Pituitary                           |
| ENSG00000100000 | SLC12A5 | 46021886: | 0.0000000052   | 0.46  | Testis                              |
| ENSG00000100000 | SLC12A5 | 46023071: | 0.000000037    | -0.43 | Brain - Cortex                      |
| ENSG00000100000 | SLC12A5 | 46021886: | 0.000000051    | 0.59  | Brain - Substantia nigra            |
| ENSG00000100000 | SLC12A5 | 46021886: | 0.000000000000 | 0.68  | Pituitary                           |

|                   |                         |       |                               |
|-------------------|-------------------------|-------|-------------------------------|
| ENSG000001SLC12A5 | 46021886:0.00000000001  | 0.6   | Brain - Cerebellum            |
| ENSG000001SLC12A5 | 46021886:0.00000000003  | 0.53  | Testis                        |
| ENSG000001SLC12A5 | 46023071:0.0000000012   | -0.51 | Brain - Cortex                |
| ENSG000001SLC12A5 | 46023071: 0.000000012   | -0.32 | Brain - Cerebellar Hemisphere |
| ENSG000001SLC12A5 | 46021886:0.00000000029  | 0.58  | Pituitary                     |
| ENSG000001SLC12A5 | 46023071: 0.00000017    | -0.41 | Brain - Cortex                |
| ENSG000001SNX21   | 45835116: 0.00000069    | -0.24 | Muscle - Skeletal             |
| ENSG000001SLC12A5 | 46021886:0.00000000001  | 0.59  | Pituitary                     |
| ENSG000001SLC12A5 | 46023071: 0.000000072   | -0.43 | Brain - Cortex                |
| ENSG000001SLC12A5 | 46021886:0.00000000001  | 0.59  | Pituitary                     |
| ENSG000001SLC12A5 | 46023071: 0.000000072   | -0.43 | Brain - Cortex                |
| ENSG000001SLC12A5 | 46021886:0.00000000093  | 0.54  | Pituitary                     |
| ENSG000001ACOT8   | 45841956: 0.000000011   | 0.41  | Heart - Atrial Appendage      |
| ENSG000001SNX21   | 45835116: 0.00000036    | -0.24 | Muscle - Skeletal             |
| ENSG000001PLTP    | 45910070: 0.00000056    | -0.23 | Whole Blood                   |
| ENSG000001ACOT8   | 45841956: 0.00000064    | 0.25  | Nerve - Tibial                |
| ENSG000001SLC12A5 | 46021886:0.00000000009  | 0.63  | Pituitary                     |
| ENSG000001SLC12A5 | 46023071: 0.000000033   | -0.45 | Brain - Cortex                |
| ENSG000001SLC12A5 | 46021886: 0.0000002     | 0.46  | Brain - Cerebellum            |
| ENSG000001SLC12A5 | 46021886: 0.0000011     | 0.38  | Testis                        |
| ENSG000001ACOT8   | 45841956: 0.000000038   | -0.41 | Heart - Left Ventricle        |
|                   |                         |       |                               |
| ENSG000001SLC12A5 | 46021886:0.000000000000 | 0.64  | Pituitary                     |
| ENSG000001SLC12A5 | 46021886:0.00000000048  | 0.48  | Testis                        |
| ENSG000001SLC12A5 | 46021886: 0.0000000039  | 0.5   | Brain - Cerebellum            |
| ENSG000001SLC12A5 | 46023071: 0.0000000041  | -0.46 | Brain - Cortex                |
| ENSG000001SLC12A5 | 46023071: 0.000000014   | -0.3  | Brain - Cerebellar Hemisphere |
| ENSG000001SLC12A5 | 46021886:0.00000000002  | 0.58  | Pituitary                     |
| ENSG000001SLC12A5 | 46023071: 0.000000013   | -0.42 | Brain - Cortex                |
| ENSG000001SLC12A5 | 46021886:0.00000000004  | 0.59  | Pituitary                     |
| ENSG000001SLC12A5 | 46021886: 0.0000000075  | 0.45  | Testis                        |
| ENSG000001SLC12A5 | 46021886: 0.000000068   | 0.59  | Brain - Substantia nigra      |
| ENSG000001SLC12A5 | 46023071: 0.000000079   | -0.42 | Brain - Cortex                |
| ENSG000001SLC12A5 | 46021886:0.00000000007  | 0.61  | Pituitary                     |
| ENSG000001SLC12A5 | 46021886: 0.0000000052  | 0.46  | Testis                        |
| ENSG000001SLC12A5 | 46023071: 0.000000037   | -0.43 | Brain - Cortex                |
| ENSG000001SLC12A5 | 46021886: 0.000000051   | 0.59  | Brain - Substantia nigra      |
| ENSG000001SLC12A5 | 46021886:0.00000000000  | 0.68  | Pituitary                     |
| ENSG000001SLC12A5 | 46021886:0.00000000001  | 0.6   | Brain - Cerebellum            |
| ENSG000001SLC12A5 | 46021886:0.00000000003  | 0.53  | Testis                        |
| ENSG000001SLC12A5 | 46023071:0.0000000012   | -0.51 | Brain - Cortex                |
| ENSG000001SLC12A5 | 46023071: 0.000000012   | -0.32 | Brain - Cerebellar Hemisphere |
| ENSG000001SLC12A5 | 46021886: 0.00000055    | 0.31  | Cells - Cultured fibroblasts  |
| ENSG000001SLC12A5 | 46021886:0.00000000029  | 0.58  | Pituitary                     |
| ENSG000001SLC12A5 | 46023071: 0.000000017   | -0.41 | Brain - Cortex                |
| ENSG000001SNX21   | 45835116: 0.00000069    | -0.24 | Muscle - Skeletal             |
| ENSG000001SLC12A5 | 46021886:0.00000000001  | 0.59  | Pituitary                     |

|                   |           |              |       |                                |
|-------------------|-----------|--------------|-------|--------------------------------|
| ENSG000001SLC12A5 | 46023071: | 0.00000072   | -0.43 | Brain - Cortex                 |
| ENSG000001SLC12A5 | 46021886: | 0.0000000001 | 0.59  | Pituitary                      |
| ENSG000001SLC12A5 | 46023071: | 0.00000072   | -0.43 | Brain - Cortex                 |
| ENSG000001SLC12A5 | 46021886: | 0.0000000000 | 0.63  | Pituitary                      |
| ENSG000001SLC12A5 | 46021886: | 0.0000000099 | 0.49  | Testis                         |
| ENSG000001SLC12A5 | 46023071: | 0.00000029   | -0.44 | Brain - Cortex                 |
| ENSG000001SLC12A5 | 46021886: | 0.00000056   | 0.61  | Brain - Substantia nigra       |
| ENSG000001SLC12A5 | 46023071: | 0.00000078   | -0.32 | Brain - Cerebellar Hemisphere  |
| ENSG000001SLC12A5 | 46021886: | 0.0000002    | 0.45  | Brain - Cerebellum             |
| ENSG000001SLC12A5 | 46021886: | 0.00000062   | 0.45  | Spleen                         |
| ENSG000001SLC12A5 | 46021886: | 0.0000000093 | 0.54  | Pituitary                      |
| ENSG000001ACOT8   | 45841956: | 0.00000011   | 0.41  | Heart - Atrial Appendage       |
| ENSG000001SNX21   | 45835116: | 0.00000036   | -0.24 | Muscle - Skeletal              |
| ENSG000001PLTP    | 45910070: | 0.00000056   | -0.23 | Whole Blood                    |
| ENSG000001ACOT8   | 45841956: | 0.00000064   | 0.25  | Nerve - Tibial                 |
| ENSG000001ACOT8   | 45841956: | 0.00000038   | -0.41 | Heart - Left Ventricle         |
| ENSG000001PLTP    | 45907904: | 0.00000011   | 0.37  | Adipose - Subcutaneous         |
| ENSG000001PLTP    | 45907904: | 0.00000012   | 0.41  | Breast - Mammary Tissue        |
| ENSG000001PLTP    | 45907904: | 0.00000025   | 0.33  | Skin - Sun Exposed (Lower leg) |
| ENSG000001PLTP    | 45907904: | 0.0000008    | 0.34  | Lung                           |
| ENSG000001PLTP    | 45907904: | 0.00000013   | 0.36  | Adipose - Subcutaneous         |
| ENSG000001PLTP    | 45907904: | 0.00000022   | 0.39  | Breast - Mammary Tissue        |
| ENSG000001PLTP    | 45907904: | 0.00000025   | 0.33  | Skin - Sun Exposed (Lower leg) |
| ENSG000001PLTP    | 45907904: | 0.0000008    | 0.34  | Lung                           |
| ENSG000001PLTP    | 45907904: | 0.00000028   | 0.35  | Adipose - Subcutaneous         |
| ENSG000001PLTP    | 45907904: | 0.00000025   | 0.39  | Breast - Mammary Tissue        |
| ENSG000001PLTP    | 45907904: | 0.00000056   | 0.32  | Skin - Sun Exposed (Lower leg) |
| ENSG000001PLTP    | 45907904: | 0.000001     | 0.33  | Lung                           |
| ENSG000001PLTP    | 45907904: | 0.00000021   | 0.36  | Adipose - Subcutaneous         |
| ENSG000001PLTP    | 45907904: | 0.00000011   | 0.41  | Breast - Mammary Tissue        |
| ENSG000001PLTP    | 45907904: | 0.00000074   | 0.32  | Skin - Sun Exposed (Lower leg) |
| ENSG000001PLTP    | 45907904: | 0.0000012    | 0.33  | Lung                           |
| ENSG000001PLTP    | 45907904: | 0.00000015   | 0.36  | Adipose - Subcutaneous         |
| ENSG000001PLTP    | 45907904: | 0.00000056   | 0.42  | Breast - Mammary Tissue        |
| ENSG000001PLTP    | 45907904: | 0.0000011    | 0.31  | Skin - Sun Exposed (Lower leg) |
| ENSG000001PLTP    | 45907904: | 0.00000012   | 0.37  | Adipose - Subcutaneous         |
| ENSG000001PLTP    | 45907904: | 0.00000014   | 0.44  | Breast - Mammary Tissue        |
| ENSG000001PLTP    | 45907904: | 0.00000012   | 0.37  | Adipose - Subcutaneous         |
| ENSG000001PLTP    | 45907904: | 0.00000039   | 0.43  | Breast - Mammary Tissue        |
| ENSG000001PLTP    | 45907904: | 0.00000012   | 0.37  | Adipose - Subcutaneous         |
| ENSG000001PLTP    | 45907904: | 0.00000039   | 0.43  | Breast - Mammary Tissue        |
| ENSG000001PLTP    | 45907904: | 0.00000012   | 0.37  | Adipose - Subcutaneous         |
| ENSG000001PLTP    | 45907904: | 0.00000039   | 0.43  | Breast - Mammary Tissue        |
| ENSG000001PLTP    | 45907904: | 0.00000012   | 0.37  | Adipose - Subcutaneous         |
| ENSG000001PLTP    | 45907904: | 0.00000039   | 0.43  | Breast - Mammary Tissue        |
| ENSG000001PLTP    | 45907904: | 0.00000012   | 0.37  | Adipose - Subcutaneous         |

|                 |         |          |               |       |                                     |
|-----------------|---------|----------|---------------|-------|-------------------------------------|
| ENSG00000101210 | PLTP    | 45907904 | 0.00000014    | 0.44  | Breast - Mammary Tissue             |
| ENSG00000101210 | PLTP    | 45907904 | 0.00000012    | 0.37  | Adipose - Subcutaneous              |
| ENSG00000101210 | PLTP    | 45907904 | 0.00000014    | 0.44  | Breast - Mammary Tissue             |
| ENSG00000101210 | SLC12A5 | 46021886 | 0.0000000061  | 44562 | Pituitary                           |
| ENSG00000101210 | CD40    | 46126741 | 0.00000000096 | 0.47  | Lung                                |
| ENSG00000101210 | CD40    | 46126741 | 0.00000000096 | 0.47  | Lung                                |
| ENSG00000101210 | CD40    | 46126741 | 0.0000000038  | 0.51  | Thyroid                             |
| ENSG00000101210 | SLC12A5 | 46021886 | 0.000000018   | 0.78  | Pituitary                           |
| ENSG00000101210 | CD40    | 46126741 | 0.000000018   | 0.51  | Artery - Aorta                      |
| ENSG00000101210 | ACOT8   | 45841956 | 0.000000037   | 0.61  | Heart - Left Ventricle              |
| ENSG00000101210 | CD40    | 46126741 | 0.000000076   | 0.76  | Cells - EBV-transformed lymphocytes |
| ENSG00000101210 | CD40    | 46126741 | 0.000000012   | 0.36  | Adipose - Subcutaneous              |
| ENSG00000101210 | CD40    | 46126741 | 0.000000017   | 0.41  | Adipose - Visceral (Omentum)        |
| ENSG00000101210 | CD40    | 46126741 | 0.000000017   | 0.41  | Adipose - Visceral (Omentum)        |
| ENSG00000101210 | CD40    | 46126741 | 0.000000035   | 0.39  | Nerve - Tibial                      |
| ENSG00000101210 | CD40    | 46126741 | 0.00000000096 | 0.47  | Lung                                |
| ENSG00000101210 | CD40    | 46126741 | 0.00000000096 | 0.47  | Lung                                |
| ENSG00000101210 | CD40    | 46126741 | 0.0000000043  | 0.51  | Thyroid                             |
| ENSG00000101210 | SLC12A5 | 46021886 | 0.000000018   | 0.78  | Pituitary                           |
| ENSG00000101210 | CD40    | 46126741 | 0.000000018   | 0.51  | Artery - Aorta                      |
| ENSG00000101210 | ACOT8   | 45841956 | 0.000000049   | 0.61  | Heart - Left Ventricle              |
| ENSG00000101210 | CD40    | 46126741 | 0.000000076   | 0.76  | Cells - EBV-transformed lymphocytes |
| ENSG00000101210 | CD40    | 46126741 | 0.000000015   | 0.35  | Adipose - Subcutaneous              |
| ENSG00000101210 | CD40    | 46126741 | 0.000000017   | 0.41  | Adipose - Visceral (Omentum)        |
| ENSG00000101210 | CD40    | 46126741 | 0.000000017   | 0.41  | Adipose - Visceral (Omentum)        |
| ENSG00000101210 | CD40    | 46126741 | 0.000000035   | 0.39  | Nerve - Tibial                      |
| ENSG00000101210 | CD40    | 46126741 | 0.00000000028 | 0.52  | Lung                                |
| ENSG00000101210 | CD40    | 46126741 | 0.00000000028 | 0.52  | Lung                                |
| ENSG00000101210 | CD40    | 46126741 | 0.0000000011  | 0.55  | Thyroid                             |
| ENSG00000101210 | CD40    | 46126741 | 0.0000000011  | 0.58  | Artery - Aorta                      |
| ENSG00000101210 | ACOT8   | 45841956 | 0.000000024   | 0.69  | Heart - Left Ventricle              |
| ENSG00000101210 | SLC12A5 | 46021886 | 0.000000004   | 0.78  | Pituitary                           |
| ENSG00000101210 | ACOT8   | 45841956 | 0.0000000059  | 0.62  | Heart - Atrial Appendage            |
| ENSG00000101210 | CD40    | 46126741 | 0.0000000062  | 0.88  | Cells - EBV-transformed lymphocytes |
| ENSG00000101210 | CD40    | 46126741 | 0.000000046   | 0.45  | Adipose - Visceral (Omentum)        |
| ENSG00000101210 | CD40    | 46126741 | 0.000000046   | 0.45  | Adipose - Visceral (Omentum)        |
| ENSG00000101210 | CD40    | 46126741 | 0.000000062   | 0.38  | Adipose - Subcutaneous              |
| ENSG00000101210 | CD40    | 46126741 | 0.000000007   | 0.43  | Nerve - Tibial                      |
| ENSG00000101210 | SLC12A5 | 46023071 | 0.000000045   | -0.47 | Lung                                |
| ENSG00000101210 | CD40    | 46126741 | 0.0000000022  | 0.51  | Thyroid                             |
| ENSG00000101210 | CD40    | 46126741 | 0.0000000092  | 0.44  | Lung                                |
| ENSG00000101210 | CD40    | 46126741 | 0.0000000092  | 0.44  | Lung                                |
| ENSG00000101210 | SLC12A5 | 46021886 | 0.0000000098  | 0.79  | Pituitary                           |
| ENSG00000101210 | CD40    | 46126741 | 0.000000049   | 0.48  | Artery - Aorta                      |
| ENSG00000101210 | ACOT8   | 45841956 | 0.000000011   | 0.58  | Heart - Left Ventricle              |



|                |           |               |       |                                     |
|----------------|-----------|---------------|-------|-------------------------------------|
| ENSG0000010240 | 46126741: | 0.00000015    | 0.74  | Cells - EBV-transformed lymphocytes |
| ENSG0000010240 | 45841956: | 0.00000033    | 0.5   | Heart - Atrial Appendage            |
| ENSG0000010240 | 46126741: | 0.0000000029  | 0.5   | Thyroid                             |
| ENSG0000010240 | 46126741: | 0.0000000067  | 0.45  | Lung                                |
| ENSG0000010240 | 46126741: | 0.0000000067  | 0.45  | Lung                                |
| ENSG0000010240 | 46021886: | 0.0000000098  | 0.79  | Pituitary                           |
| ENSG0000010240 | 46126741: | 0.000000041   | 0.49  | Artery - Aorta                      |
| ENSG0000010240 | 45841956: | 0.00000011    | 0.58  | Heart - Left Ventricle              |
| ENSG0000010240 | 46126741: | 0.00000015    | 0.74  | Cells - EBV-transformed lymphocytes |
| ENSG0000010240 | 45841956: | 0.00000041    | 0.49  | Heart - Atrial Appendage            |
| ENSG0000010240 | 46021886: | 0.00000000026 | 0.86  | Pituitary                           |
| ENSG0000010240 | 46126741: | 0.0000000065  | 0.45  | Lung                                |
| ENSG0000010240 | 46126741: | 0.0000000065  | 0.45  | Lung                                |
| ENSG0000010240 | 46126741: | 0.0000000015  | 0.47  | Thyroid                             |
| ENSG0000010240 | 46126741: | 0.00000002    | 0.5   | Artery - Aorta                      |
| ENSG0000010240 | 45841956: | 0.000000066   | 0.59  | Heart - Left Ventricle              |
| ENSG0000010240 | 46126741: | 0.000000092   | 0.76  | Cells - EBV-transformed lymphocytes |
| ENSG0000010240 | 46023071: | 0.00000012    | -0.43 | Brain - Cerebellar Hemisphere       |
| ENSG0000010240 | 45841956: | 0.00000025    | 0.49  | Heart - Atrial Appendage            |
| ENSG0000010240 | 46021886: | 0.0000000058  | 0.79  | Pituitary                           |
| ENSG0000010240 | 46126741: | 0.0000000067  | 0.45  | Lung                                |
| ENSG0000010240 | 46126741: | 0.0000000067  | 0.45  | Lung                                |
| ENSG0000010240 | 46126741: | 0.0000000022  | 0.47  | Thyroid                             |
| ENSG0000010240 | 46126741: | 0.000000046   | 0.78  | Cells - EBV-transformed lymphocytes |
| ENSG0000010240 | 46126741: | 0.000000053   | 0.49  | Artery - Aorta                      |
| ENSG0000010240 | 45841956: | 0.00000015    | 0.58  | Heart - Left Ventricle              |
| ENSG0000010240 | 45841956: | 0.00000039    | 0.49  | Heart - Atrial Appendage            |
| ENSG0000010240 | 46023071: | 0.00000018    | -0.42 | Lung                                |
| ENSG0000010240 | 46021886: | 0.00000000011 | 0.88  | Pituitary                           |
| ENSG0000010240 | 46126741: | 0.0000000027  | 0.42  | Lung                                |
| ENSG0000010240 | 46126741: | 0.0000000027  | 0.42  | Lung                                |
| ENSG0000010240 | 46126741: | 0.0000000067  | 0.45  | Thyroid                             |
| ENSG0000010240 | 46126741: | 0.000000055   | 0.47  | Artery - Aorta                      |
| ENSG0000010240 | 45841956: | 0.000000085   | 0.58  | Heart - Left Ventricle              |
| ENSG0000010240 | 46023071: | 0.00000012    | -0.43 | Brain - Cerebellar Hemisphere       |
| ENSG0000010240 | 46126741: | 0.00000023    | 0.73  | Cells - EBV-transformed lymphocytes |
| ENSG0000010240 | 45841956: | 0.00000036    | 0.48  | Heart - Atrial Appendage            |
| ENSG0000010240 | 46021886: | 0.000000002   | 0.82  | Pituitary                           |
| ENSG0000010240 | 46126741: | 0.0000000011  | 0.44  | Lung                                |
| ENSG0000010240 | 46126741: | 0.0000000011  | 0.44  | Lung                                |
| ENSG0000010240 | 46126741: | 0.0000000012  | 0.48  | Thyroid                             |
| ENSG0000010240 | 46126741: | 0.00000004    | 0.49  | Artery - Aorta                      |
| ENSG0000010240 | 46126741: | 0.000000092   | 0.76  | Cells - EBV-transformed lymphocytes |
| ENSG0000010240 | 45841956: | 0.00000012    | 0.58  | Heart - Left Ventricle              |
| ENSG0000010240 | 45841956: | 0.00000018    | 0.5   | Heart - Atrial Appendage            |
| ENSG0000010240 | 46023071: | 0.0000002     | -0.41 | Lung                                |
| ENSG0000010240 | 46021886: | 0.00000000026 | 0.86  | Pituitary                           |

|                 |         |                          |       |                                     |
|-----------------|---------|--------------------------|-------|-------------------------------------|
| ENSG00000102400 | CD40    | 46126741: 0.0000000018   | 0.43  | Lung                                |
| ENSG00000102400 | CD40    | 46126741: 0.0000000018   | 0.43  | Lung                                |
| ENSG00000102400 | CD40    | 46126741: 0.0000000032   | 0.46  | Thyroid                             |
| ENSG00000102400 | CD40    | 46126741: 0.0000000032   | 0.48  | Artery - Aorta                      |
| ENSG00000102400 | ACOT8   | 45841956: 0.0000000007   | 0.58  | Heart - Left Ventricle              |
| ENSG00000102400 | CD40    | 46126741: 0.0000000092   | 0.76  | Cells - EBV-transformed lymphocytes |
| ENSG00000102400 | SLC12A5 | 46023071: 0.0000000012   | -0.43 | Brain - Cerebellar Hemisphere       |
| ENSG00000102400 | ACOT8   | 45841956: 0.0000000021   | 0.49  | Heart - Atrial Appendage            |
| ENSG00000102400 | SLC12A5 | 46021886: 0.000000000026 | 0.86  | Pituitary                           |
| ENSG00000102400 | CD40    | 46126741: 0.0000000065   | 0.45  | Lung                                |
| ENSG00000102400 | CD40    | 46126741: 0.0000000065   | 0.45  | Lung                                |
| ENSG00000102400 | CD40    | 46126741: 0.0000000032   | 0.46  | Thyroid                             |
| ENSG00000102400 | CD40    | 46126741: 0.0000000038   | 0.49  | Artery - Aorta                      |
| ENSG00000102400 | ACOT8   | 45841956: 0.0000000007   | 0.58  | Heart - Left Ventricle              |
| ENSG00000102400 | CD40    | 46126741: 0.0000000092   | 0.76  | Cells - EBV-transformed lymphocytes |
| ENSG00000102400 | SLC12A5 | 46023071: 0.0000000012   | -0.43 | Brain - Cerebellar Hemisphere       |
| ENSG00000102400 | ACOT8   | 45841956: 0.0000000021   | 0.49  | Heart - Atrial Appendage            |
| ENSG00000102400 | SLC12A5 | 46021886: 0.000000000000 | 0.98  | Pituitary                           |
| ENSG00000102400 | SLC12A5 | 46021886: 0.000000000000 | 0.99  | Brain - Cerebellum                  |
| ENSG00000102400 | SLC12A5 | 46021886: 0.000000000000 | 0.74  | Testis                              |
| ENSG00000102400 | SLC12A5 | 46023071: 0.000000000000 | -0.57 | Brain - Cerebellar Hemisphere       |
| ENSG00000102400 | SLC12A5 | 46023071: 0.0000000017   | -0.69 | Brain - Cortex                      |
| ENSG00000102400 | SLC12A5 | 46021886: 0.0000000097   | 0.43  | Adipose - Visceral (Omentum)        |
| ENSG00000102400 | CD40    | 46126741: 0.0000000013   | 0.36  | Thyroid                             |
| ENSG00000102400 | SLC35C2 | 46357702: 0.0000000024   | 0.61  | Brain - Cerebellum                  |
| ENSG00000102400 | ACOT8   | 45841956: 0.0000000003   | 0.48  | Heart - Left Ventricle              |
| ENSG00000102400 | SLC12A5 | 46021886: 0.000000000026 | 0.86  | Pituitary                           |
| ENSG00000102400 | CD40    | 46126741: 0.0000000065   | 0.45  | Lung                                |
| ENSG00000102400 | CD40    | 46126741: 0.0000000065   | 0.45  | Lung                                |
| ENSG00000102400 | CD40    | 46126741: 0.0000000032   | 0.46  | Thyroid                             |
| ENSG00000102400 | CD40    | 46126741: 0.0000000038   | 0.49  | Artery - Aorta                      |
| ENSG00000102400 | ACOT8   | 45841956: 0.0000000007   | 0.58  | Heart - Left Ventricle              |
| ENSG00000102400 | CD40    | 46126741: 0.0000000092   | 0.76  | Cells - EBV-transformed lymphocytes |
| ENSG00000102400 | SLC12A5 | 46023071: 0.0000000012   | -0.43 | Brain - Cerebellar Hemisphere       |
| ENSG00000102400 | ACOT8   | 45841956: 0.0000000021   | 0.49  | Heart - Atrial Appendage            |
