# Supplementary material for: Matrix Metalloproteinase Gene Polymorphisms Are Associated with Breast Cancer in the Caucasian Women of Russia
Source: MDPI journal article supplement (doi:10.3390/ijms232012638), 2022-10-20
Supplement: s1 [file s1]

Supplementary table S7 eQTL values of the BC-associated SNPs of the MMP genes  
(according to Genotype-Tissue Expression (GTEx) (<http://www.gtexportal.org/>)) (  $p < 8.0E5$ ,  $FDR \leq 0.05$ )

| Chr | SNP       | Gene Symbol          | Variant Id               | P-Value             |
|-----|-----------|----------------------|--------------------------|---------------------|
| 11  | rs1940475 | <i>MMP27</i>         | chr11_102722517_T_C_b38  | 0.00000000000022    |
|     |           | <i>MMP27</i>         | chr11_102722517_T_C_b38  | 0.0000000000017     |
|     |           | <i>MMP27</i>         | chr11_102722517_T_C_b38  | 0.0000000006        |
|     |           | <i>RP11-817J15.3</i> | chr11_102722517_T_C_b38  | 0.0000000055        |
|     |           | <i>MMP27</i>         | chr11_102722517_T_C_b38  | 0.0000000068        |
|     |           | <i>RP11-817J15.3</i> | chr11_102722517_T_C_b38  | 0.00000038          |
|     |           | <i>MMP27</i>         | chr11_102722517_T_C_b38  | 0.0000011           |
| 11  | rs1799750 | <i>MMP1</i>          | chr11_102799764_TC_T_b38 | 9.6E-84             |
|     |           | <i>MMP1</i>          | chr11_102799764_TC_T_b38 | 1.3E-25             |
|     |           | <i>MMP1</i>          | chr11_102799764_TC_T_b38 | 1.9E-25             |
|     |           | <i>MMP1</i>          | chr11_102799764_TC_T_b38 | 5.8E-23             |
|     |           | <i>MMP1</i>          | chr11_102799764_TC_T_b38 | .000000000000000001 |
|     |           | <i>MMP1</i>          | chr11_102799764_TC_T_b38 | 0.0000000000000066  |
|     |           | <i>MMP1</i>          | chr11_102799764_TC_T_b38 | 0.000000000022      |
|     |           | <i>MMP1</i>          | chr11_102799764_TC_T_b38 | 0.000000013         |
|     |           | <i>MMP1</i>          | chr11_102799764_TC_T_b38 | 0.000000015         |
|     |           | <i>MMP1</i>          | chr11_102799764_TC_T_b38 | 0.000000024         |
|     |           | <i>MMP1</i>          | chr11_102799764_TC_T_b38 | 0.000000038         |
|     |           | <i>MMP10</i>         | chr11_102799764_TC_T_b38 | 0.00000025          |
|     |           | <i>MMP1</i>          | chr11_102799764_TC_T_b38 | 0.00000028          |
|     |           | <i>MMP1</i>          | chr11_102799764_TC_T_b38 | 0.00000075          |
|     |           | <i>WTAPP1</i>        | chr11_102799764_TC_T_b38 | 0.000004            |
| 11  | rs679620  | <i>WTAPP1</i>        | 11_102713620_T_C_b37     | 0.0000000045        |
|     |           | <i>MMP1</i>          | 11_102713620_T_C_b37     | 0.0000000047        |
|     |           | <i>MMP1</i>          | 11_102713620_T_C_b37     | 0.0000023           |
| 16  | rs243865  | <i>RP11-212I21.2</i> | chr16_55477894_C_T_b38   | 0.000061            |
| 20  | rs3918242 | <i>SLC12A5</i>       | chr20_46007337_C_T_b38   | 4.6E-26             |
|     |           | <i>SLC12A5</i>       | chr20_46007337_C_T_b38   | 2.7E-24             |
|     |           | <i>SLC12A5</i>       | chr20_46007337_C_T_b38   | 8.5E-23             |
|     |           | <i>SLC12A5</i>       | chr20_46007337_C_T_b38   | 0.00000000000002    |
|     |           | <i>SLC12A5</i>       | chr20_46007337_C_T_b38   | 0.00000000003       |
|     |           | <i>SLC12A5</i>       | chr20_46007337_C_T_b38   | 0.00000000002       |
|     |           | <i>SLC12A5</i>       | chr20_46007337_C_T_b38   | 0.000000000028      |
|     |           | <i>SLC12A5</i>       | chr20_46007337_C_T_b38   | 0.0000000015        |
|     |           | <i>SLC12A5</i>       | chr20_46007337_C_T_b38   | 0.000000003         |
|     |           | <i>SLC12A5</i>       | chr20_46007337_C_T_b38   | 0.000000049         |
|     |           | <i>SLC12A5</i>       | chr20_46007337_C_T_b38   | 0.000000016         |
|     |           | <i>PLTP</i>          | chr20_46007337_C_T_b38   | 0.000000026         |

|              |                       |                        |                   |
|--------------|-----------------------|------------------------|-------------------|
|              | <i>SLC12A5</i>        | chr20_46007337_C_T_b38 | 0.00000079        |
|              | <i>PLTP</i>           | chr20_46007337_C_T_b38 | 0.0000019         |
|              | <i>SLC12A5</i>        | chr20_46007337_C_T_b38 | 0.0000025         |
|              | <i>SLC12A5</i>        | chr20_46007337_C_T_b38 | 0.0000035         |
|              | <i>RPL13P2</i>        | chr20_46007337_C_T_b38 | 0.0000052         |
|              | <i>MMP9</i>           | chr20_46007337_C_T_b38 | 0.0000087         |
|              | <i>SNX21</i>          | chr20_46007337_C_T_b38 | 0.000011          |
|              | <i>SLC12A5</i>        | chr20_46007337_C_T_b38 | 0.000019          |
|              | <i>WFDC3</i>          | chr20_46007337_C_T_b38 | 0.000028          |
|              | <i>PLTP</i>           | chr20_46007337_C_T_b38 | 0.00003           |
|              | <i>PLTP</i>           | chr20_46007337_C_T_b38 | 0.000033          |
|              | <i>SLC12A5</i>        | chr20_46007337_C_T_b38 | 0.000035          |
|              | <i>DNTTIP1</i>        | chr20_46007337_C_T_b38 | 0.000053          |
|              | <i>MMP9</i>           | chr20_46007337_C_T_b38 | 0.000064          |
|              | <i>PLTP</i>           | chr20_46007337_C_T_b38 | 0.000075          |
|              | <i>WFDC3</i>          | chr20_46007337_C_T_b38 | 0.000085          |
|              | <i>SYS1</i>           | chr20_46007337_C_T_b38 | 0.000096          |
|              | <i>PLTP</i>           | chr20_46007337_C_T_b38 | 0.00011           |
|              | <i>WFDC3</i>          | chr20_46007337_C_T_b38 | 0.00015           |
|              | <i>PLTP</i>           | chr20_46007337_C_T_b38 | 0.00016           |
| 20 rs3918249 | <i>SLC12A5</i>        | chr20_46009497_T_C_b38 | 0.000000000000055 |
|              | <i>PLTP</i>           | chr20_46009497_T_C_b38 | 0.0000000000015   |
|              | <i>PLTP</i>           | chr20_46009497_T_C_b38 | 0.000000000013    |
|              | <i>NEURL2</i>         | chr20_46009497_T_C_b38 | 0.000000000043    |
|              | <i>MMP9</i>           | chr20_46009497_T_C_b38 | 0.000000000065    |
|              | <i>PLTP</i>           | chr20_46009497_T_C_b38 | 0.0000000012      |
|              | <i>RP3-337O18.9</i>   | chr20_46009497_T_C_b38 | 0.000000012       |
|              | <i>NEURL2</i>         | chr20_46009497_T_C_b38 | 0.000000014       |
|              | <i>ZSWIM1</i>         | chr20_46009497_T_C_b38 | 0.000000018       |
|              | <i>ZNF335</i>         | chr20_46009497_T_C_b38 | 0.000000026       |
|              | <i>PLTP</i>           | chr20_46009497_T_C_b38 | 0.000000053       |
|              | <i>PLTP</i>           | chr20_46009497_T_C_b38 | 0.00000015        |
|              | <i>PLTP</i>           | chr20_46009497_T_C_b38 | 0.00000016        |
|              | <i>RP3-337O18.9</i>   | chr20_46009497_T_C_b38 | 0.00000023        |
|              | <i>ZNF335</i>         | chr20_46009497_T_C_b38 | 0.00000028        |
|              | <i>PLTP</i>           | chr20_46009497_T_C_b38 | 0.00000029        |
|              | <i>MMP9</i>           | chr20_46009497_T_C_b38 | 0.00000034        |
|              | <i>RP11-465L10.10</i> | chr20_46009497_T_C_b38 | 0.00000041        |
|              | <i>SPATA25</i>        | chr20_46009497_T_C_b38 | 0.00000056        |
|              | <i>PLTP</i>           | chr20_46009497_T_C_b38 | 0.00000057        |
|              | <i>RP3-337O18.9</i>   | chr20_46009497_T_C_b38 | 0.00000063        |
|              | <i>NEURL2</i>         | chr20_46009497_T_C_b38 | 0.0000011         |
|              | <i>PLTP</i>           | chr20_46009497_T_C_b38 | 0.0000016         |
|              | <i>PLTP</i>           | chr20_46009497_T_C_b38 | 0.0000023         |
|              | <i>RP3-337O18.9</i>   | chr20_46009497_T_C_b38 | 0.0000035         |
|              | <i>NEURL2</i>         | chr20_46009497_T_C_b38 | 0.0000036         |

|            |                       |                        |                   |
|------------|-----------------------|------------------------|-------------------|
|            | <i>PCIF1</i>          | chr20_46009497_T_C_b38 | 0.0000056         |
|            | <i>PLTP</i>           | chr20_46009497_T_C_b38 | 0.000012          |
|            | <i>CD40</i>           | chr20_46009497_T_C_b38 | 0.000013          |
|            | <i>PLTP</i>           | chr20_46009497_T_C_b38 | 0.000016          |
|            | <i>CD40</i>           | chr20_46009497_T_C_b38 | 0.000026          |
|            | <i>DNTTIP1</i>        | chr20_46009497_T_C_b38 | 0.000029          |
|            | <i>MMP9</i>           | chr20_46009497_T_C_b38 | 0.000031          |
|            | <i>DNTTIP1</i>        | chr20_46009497_T_C_b38 | 0.000041          |
|            | <i>NEURL2</i>         | chr20_46009497_T_C_b38 | 0.000049          |
|            | <i>PLTP</i>           | chr20_46009497_T_C_b38 | 0.000049          |
|            | <i>CD40</i>           | chr20_46009497_T_C_b38 | 0.000057          |
|            | <i>PLTP</i>           | chr20_46009497_T_C_b38 | 0.000062          |
|            | <i>WFDC3</i>          | chr20_46009497_T_C_b38 | 0.000062          |
|            | <i>RP3-337O18.9</i>   | chr20_46009497_T_C_b38 | 0.000083          |
|            | <i>DNTTIP1</i>        | chr20_46009497_T_C_b38 | 0.00012           |
|            | <i>SNX21</i>          | chr20_46009497_T_C_b38 | 0.00014           |
|            | <i>WFDC10B</i>        | chr20_46009497_T_C_b38 | 0.00019           |
|            | <i>SPATA25</i>        | chr20_46009497_T_C_b38 | 0.0002            |
| 20 rs17576 | <i>PLTP</i>           | chr20_46011586_A_G_b38 | 0.000000000000015 |
|            | <i>SLC12A5</i>        | chr20_46011586_A_G_b38 | 0.00000000000073  |
|            | <i>NEURL2</i>         | chr20_46011586_A_G_b38 | 0.0000000000073   |
|            | <i>PLTP</i>           | chr20_46011586_A_G_b38 | 0.000000000019    |
|            | <i>PLTP</i>           | chr20_46011586_A_G_b38 | 0.000000000038    |
|            | <i>RP3-337O18.9</i>   | chr20_46011586_A_G_b38 | 0.00000000011     |
|            | <i>NEURL2</i>         | chr20_46011586_A_G_b38 | 0.00000000022     |
|            | <i>PLTP</i>           | chr20_46011586_A_G_b38 | 0.00000000031     |
|            | <i>ZSWIM1</i>         | chr20_46011586_A_G_b38 | 0.00000000034     |
|            | <i>PLTP</i>           | chr20_46011586_A_G_b38 | 0.00000000038     |
|            | <i>PLTP</i>           | chr20_46011586_A_G_b38 | 0.00000000089     |
|            | <i>MMP9</i>           | chr20_46011586_A_G_b38 | 0.0000000019      |
|            | <i>RP3-337O18.9</i>   | chr20_46011586_A_G_b38 | 0.0000000047      |
|            | <i>PLTP</i>           | chr20_46011586_A_G_b38 | 0.000000005       |
|            | <i>RP3-337O18.9</i>   | chr20_46011586_A_G_b38 | 0.0000000069      |
|            | <i>SPATA25</i>        | chr20_46011586_A_G_b38 | 0.0000000082      |
|            | <i>NEURL2</i>         | chr20_46011586_A_G_b38 | 0.0000000092      |
|            | <i>PLTP</i>           | chr20_46011586_A_G_b38 | 0.0000001         |
|            | <i>PLTP</i>           | chr20_46011586_A_G_b38 | 0.00000013        |
|            | <i>NEURL2</i>         | chr20_46011586_A_G_b38 | 0.00000021        |
|            | <i>RP11-465L10.10</i> | chr20_46011586_A_G_b38 | 0.00000041        |
|            | <i>PLTP</i>           | chr20_46011586_A_G_b38 | 0.00000056        |
|            | <i>ZNF335</i>         | chr20_46011586_A_G_b38 | 0.00000077        |
|            | <i>PLTP</i>           | chr20_46011586_A_G_b38 | 0.0000019         |
|            | <i>PLTP</i>           | chr20_46011586_A_G_b38 | 0.0000025         |
|            | <i>PLTP</i>           | chr20_46011586_A_G_b38 | 0.0000027         |
|            | <i>PLTP</i>           | chr20_46011586_A_G_b38 | 0.000003          |
|            | <i>RP3-337O18.9</i>   | chr20_46011586_A_G_b38 | 0.0000058         |

|              |                     |                        |                  |
|--------------|---------------------|------------------------|------------------|
|              | <i>ZNF335</i>       | chr20_46011586_A_G_b38 | 0.0000062        |
|              | <i>PCIF1</i>        | chr20_46011586_A_G_b38 | 0.0000076        |
|              | <i>PLTP</i>         | chr20_46011586_A_G_b38 | 0.0000089        |
|              | <i>NEURL2</i>       | chr20_46011586_A_G_b38 | 0.000013         |
|              | <i>RP3-337O18.9</i> | chr20_46011586_A_G_b38 | 0.000018         |
|              | <i>NEURL2</i>       | chr20_46011586_A_G_b38 | 0.000018         |
|              | <i>SLC12A5</i>      | chr20_46011586_A_G_b38 | 0.000023         |
|              | <i>NEURL2</i>       | chr20_46011586_A_G_b38 | 0.000035         |
|              | <i>MMP9</i>         | chr20_46011586_A_G_b38 | 0.000036         |
|              | <i>CD40</i>         | chr20_46011586_A_G_b38 | 0.000041         |
|              | <i>NEURL2</i>       | chr20_46011586_A_G_b38 | 0.000052         |
|              | <i>CD40</i>         | chr20_46011586_A_G_b38 | 0.000069         |
|              | <i>RP3-337O18.9</i> | chr20_46011586_A_G_b38 | 0.000074         |
|              | <i>WFDC3</i>        | chr20_46011586_A_G_b38 | 0.000099         |
|              | <i>CD40</i>         | chr20_46011586_A_G_b38 | 0.000099         |
|              | <i>DNTTIP1</i>      | chr20_46011586_A_G_b38 | 0.00012          |
|              | <i>RP3-337O18.9</i> | chr20_46011586_A_G_b38 | 0.00013          |
|              | <i>SLC12A5</i>      | chr20_46011586_A_G_b38 | 0.00014          |
| 20 rs3787268 | <i>NEURL2</i>       | chr20_46013092_G_A_b38 | 0.000000000059   |
|              | <i>NEURL2</i>       | chr20_46013092_G_A_b38 | 0.000000005      |
|              | <i>RP3-337O18.9</i> | chr20_46013092_G_A_b38 | 0.000000011      |
|              | <i>SLC12A5</i>      | chr20_46013092_G_A_b38 | 0.00000012       |
|              | <i>SPATA25</i>      | chr20_46013092_G_A_b38 | 0.00000015       |
|              | <i>RP3-337O18.9</i> | chr20_46013092_G_A_b38 | 0.00000018       |
|              | <i>ZNF335</i>       | chr20_46013092_G_A_b38 | 0.00000045       |
|              | <i>PLTP</i>         | chr20_46013092_G_A_b38 | 0.0000005        |
|              | <i>ZSWIM1</i>       | chr20_46013092_G_A_b38 | 0.00000066       |
|              | <i>PLTP</i>         | chr20_46013092_G_A_b38 | 0.000002         |
|              | <i>PLTP</i>         | chr20_46013092_G_A_b38 | 0.0000022        |
|              | <i>RP3-337O18.9</i> | chr20_46013092_G_A_b38 | 0.0000035        |
|              | <i>RP3-337O18.9</i> | chr20_46013092_G_A_b38 | 0.000014         |
|              | <i>NEURL2</i>       | chr20_46013092_G_A_b38 | 0.000017         |
|              | <i>SLC12A5</i>      | chr20_46013092_G_A_b38 | 0.00002          |
|              | <i>PLTP</i>         | chr20_46013092_G_A_b38 | 0.000021         |
|              | <i>CD40</i>         | chr20_46013092_G_A_b38 | 0.000022         |
|              | <i>NEURL2</i>       | chr20_46013092_G_A_b38 | 0.00003          |
|              | <i>PLTP</i>         | chr20_46013092_G_A_b38 | 0.000036         |
|              | <i>PLTP</i>         | chr20_46013092_G_A_b38 | 0.000075         |
|              | <i>PLTP</i>         | chr20_46013092_G_A_b38 | 0.000076         |
|              | <i>CD40</i>         | chr20_46013092_G_A_b38 | 0.000098         |
|              | <i>ZNF335</i>       | chr20_46013092_G_A_b38 | 0.00015          |
| 20 rs2250889 | <i>PLTP</i>         | chr20_46013767_G_C_b38 | 0.00000000000075 |
|              | <i>PLTP</i>         | chr20_46013767_G_C_b38 | 0.000000000062   |
|              | <i>PLTP</i>         | chr20_46013767_G_C_b38 | 0.00000000068    |
|              | <i>PCIF1</i>        | chr20_46013767_G_C_b38 | 0.000065         |

|            |                       |                        |                     |
|------------|-----------------------|------------------------|---------------------|
|            | <i>NEURL2</i>         | chr20_46013767_G_C_b38 | 0.00012             |
| 20 rs17577 | <i>SLC12A5</i>        | chr20_46014472_G_A_b38 | 2.1E-30             |
|            | <i>SLC12A5</i>        | chr20_46014472_G_A_b38 | 5.9E-30             |
|            | <i>SLC12A5</i>        | chr20_46014472_G_A_b38 | 8.00E-24            |
|            | <i>SLC12A5</i>        | chr20_46014472_G_A_b38 | 0.00000000000000042 |
|            | <i>SLC12A5</i>        | chr20_46014472_G_A_b38 | 0.000000000000057   |
|            | <i>SLC12A5</i>        | chr20_46014472_G_A_b38 | 0.0000000000019     |
|            | <i>SLC12A5</i>        | chr20_46014472_G_A_b38 | 0.0000000000059     |
|            | <i>SLC12A5</i>        | chr20_46014472_G_A_b38 | 0.000000000018      |
|            | <i>SLC12A5</i>        | chr20_46014472_G_A_b38 | 0.00000000034       |
|            | <i>SLC12A5</i>        | chr20_46014472_G_A_b38 | 0.0000000031        |
|            | <i>PLTP</i>           | chr20_46014472_G_A_b38 | 0.000000026         |
|            | <i>SLC12A5</i>        | chr20_46014472_G_A_b38 | 0.000000033         |
|            | <i>SLC12A5</i>        | chr20_46014472_G_A_b38 | 0.000000072         |
|            | <i>SLC12A5</i>        | chr20_46014472_G_A_b38 | 0.00000011          |
|            | <i>SLC12A5</i>        | chr20_46014472_G_A_b38 | 0.00000062          |
|            | <i>SLC12A5</i>        | chr20_46014472_G_A_b38 | 0.00000064          |
|            | <i>PLTP</i>           | chr20_46014472_G_A_b38 | 0.0000011           |
|            | <i>SLC12A5</i>        | chr20_46014472_G_A_b38 | 0.0000011           |
|            | <i>SYS1</i>           | chr20_46014472_G_A_b38 | 0.0000034           |
|            | <i>SNX21</i>          | chr20_46014472_G_A_b38 | 0.0000046           |
|            | <i>RPL13P2</i>        | chr20_46014472_G_A_b38 | 0.0000057           |
|            | <i>DNTTIP1</i>        | chr20_46014472_G_A_b38 | 0.000006            |
|            | <i>PLTP</i>           | chr20_46014472_G_A_b38 | 0.0000062           |
|            | <i>MMP9</i>           | chr20_46014472_G_A_b38 | 0.000008            |
|            | <i>RP11-465L10.10</i> | chr20_46014472_G_A_b38 | 0.00013             |

| NES   | Tissue                                |
|-------|---------------------------------------|
| 0.24  | Whole Blood                           |
| -0.17 | Skin - Sun Exposed (Lower leg)        |
| -0.19 | Skin - Not Sun Exposed (Suprapubic)   |
| 0.17  | Whole Blood                           |
| -0.15 | Adipose - Subcutaneous                |
| -0.44 | Liver                                 |
| -0.17 | Muscle - Skeletal                     |
| -0.66 | Cells - Cultured fibroblasts          |
| -0.52 | Thyroid                               |
| -0.42 | Lung                                  |
| -0.58 | Heart - Atrial Appendage              |
| -0.45 | Adipose - Visceral (Omentum)          |
| -0.46 | Heart - Left Ventricle                |
| -0.36 | Nerve - Tibial                        |
| -0.32 | Esophagus - Muscularis                |
| -0.35 | Artery - Aorta                        |
| -0.28 | Adipose - Subcutaneous                |
| -0.22 | Artery - Tibial                       |
| -0.19 | Lung                                  |
| -0.3  | Esophagus - Gastroesophageal Junction |
| -0.28 | Breast - Mammary Tissue               |
| -0.15 | Testis                                |
| 0.28  | Testis                                |
| 0.31  | Cells - Transformed fibroblasts       |
| 0.3   | Heart - Left Ventricle                |
| 0.27  | Artery - Aorta                        |
| 0.64  | Lung                                  |
| 0.72  | Adipose - Subcutaneous                |
| 0.75  | Adipose - Visceral (Omentum)          |
| 0.7   | Breast - Mammary Tissue               |
| 0.67  | Artery - Aorta                        |
| 0.79  | Artery - Coronary                     |
| 0.48  | Thyroid                               |
| 0.69  | Spleen                                |
| 0.43  | Nerve - Tibial                        |
| 0.41  | Skin - Sun Exposed (Lower leg)        |
| 0.46  | Esophagus - Muscularis                |
| -0.31 | Heart - Atrial Appendage              |

|       |                                     |
|-------|-------------------------------------|
| 0.38  | Artery - Tibial                     |
| -0.24 | Lung                                |
| -0.49 | Adrenal Gland                       |
| 0.41  | Skin - Not Sun Exposed (Suprapubic) |
| -0.47 | Testis                              |
| -0.25 | Cells - Cultured fibroblasts        |
| 0.17  | Muscle - Skeletal                   |
| 0.63  | Small Intestine - Terminal Ileum    |
| -0.31 | Thyroid                             |
| -0.19 | Esophagus - Muscularis              |
| -0.31 | Pituitary                           |
| 0.38  | Colon - Transverse                  |
| -0.17 | Artery - Tibial                     |
| 0.35  | Testis                              |
| -0.16 | Artery - Tibial                     |
| -0.27 | Skin - Sun Exposed (Lower leg)      |
| -0.12 | Whole Blood                         |
| -0.17 | Thyroid                             |
| -0.25 | Artery - Tibial                     |
| -0.18 | Nerve - Tibial                      |
|       |                                     |
| -0.52 | Adrenal Gland                       |
| -0.25 | Lung                                |
| -0.28 | Colon - Sigmoid                     |
| -0.26 | Adipose - Subcutaneous              |
| -0.23 | Cells - Cultured fibroblasts        |
| -0.17 | Adipose - Subcutaneous              |
| -0.21 | Adipose - Subcutaneous              |
| -0.24 | Adipose - Visceral (Omentum)        |
| -0.24 | Adipose - Visceral (Omentum)        |
| 0.12  | Skin - Not Sun Exposed (Suprapubic) |
| -0.18 | Nerve - Tibial                      |
| -0.15 | Artery - Tibial                     |
| -0.15 | Adipose - Visceral (Omentum)        |
| -0.22 | Lung                                |
| 0.098 | Whole Blood                         |
| -0.16 | Thyroid                             |
| 0.26  | Skin - Not Sun Exposed (Suprapubic) |
| -0.41 | Adrenal Gland                       |
| -0.25 | Adipose - Visceral (Omentum)        |
| -0.21 | Heart - Left Ventricle              |
| -0.22 | Adipose - Visceral (Omentum)        |
| -0.22 | Lung                                |
| -0.17 | Colon - Transverse                  |
| -0.12 | Muscle - Skeletal                   |
| -0.28 | Colon - Sigmoid                     |
| -0.2  | Thyroid                             |

|        |                                     |
|--------|-------------------------------------|
| 0.31   | Adrenal Gland                       |
| -0.22  | Pituitary                           |
| 0.19   | Adipose - Visceral (Omentum)        |
| -0.19  | Heart - Atrial Appendage            |
| 0.15   | Skin - Sun Exposed (Lower leg)      |
| -0.14  | Spleen                              |
| 0.26   | Testis                              |
| -0.12  | Artery - Tibial                     |
| -0.22  | Colon - Transverse                  |
| -0.15  | Artery - Aorta                      |
| 0.15   | Adipose - Subcutaneous              |
| -0.13  | Esophagus - Muscularis              |
| -0.18  | Artery - Tibial                     |
| -0.24  | Heart - Atrial Appendage            |
| -0.049 | Whole Blood                         |
| 0.1    | Muscle - Skeletal                   |
| 0.14   | Skin - Sun Exposed (Lower leg)      |
| -0.19  | Nerve - Tibial                      |
|        |                                     |
| -0.27  | Lung                                |
| -0.49  | Adrenal Gland                       |
| -0.26  | Adipose - Subcutaneous              |
| -0.28  | Colon - Sigmoid                     |
| -0.17  | Adipose - Subcutaneous              |
| -0.23  | Adipose - Subcutaneous              |
| -0.25  | Adipose - Visceral (Omentum)        |
| -0.2   | Nerve - Tibial                      |
| -0.26  | Adipose - Visceral (Omentum)        |
| -0.17  | Adipose - Visceral (Omentum)        |
| -0.16  | Artery - Tibial                     |
| -0.22  | Cells - Cultured fibroblasts        |
| -0.24  | Adipose - Visceral (Omentum)        |
| -0.17  | Thyroid                             |
| -0.23  | Lung                                |
| -0.26  | Adipose - Visceral (Omentum)        |
| -0.24  | Lung                                |
| -0.22  | Heart - Left Ventricle              |
| -0.13  | Muscle - Skeletal                   |
| -0.22  | Thyroid                             |
| -0.42  | Adrenal Gland                       |
| -0.18  | Colon - Transverse                  |
| 0.11   | Skin - Not Sun Exposed (Suprapubic) |
| -0.18  | Artery - Aorta                      |
| -0.21  | Heart - Atrial Appendage            |
| -0.15  | Esophagus - Muscularis              |
| -0.25  | Adrenal Gland                       |
| -0.28  | Colon - Sigmoid                     |



|       |                                       |
|-------|---------------------------------------|
| 0.088 | Whole Blood                           |
| 0.31  | Adrenal Gland                         |
| -0.22 | Pituitary                             |
| -0.23 | Colon - Transverse                    |
| -0.26 | Heart - Atrial Appendage              |
| -0.25 | Esophagus - Gastroesophageal Junction |
| 0.19  | Lung                                  |
| -0.22 | Artery - Aorta                        |
| 0.21  | Skin - Not Sun Exposed (Suprapubic)   |
| 0.15  | Skin - Sun Exposed (Lower leg)        |
| -0.18 | Skin - Sun Exposed (Lower leg)        |
| 0.17  | Adipose - Visceral (Omentum)          |
| -0.23 | Esophagus - Gastroesophageal Junction |
| -0.18 | Artery - Tibial                       |
| 0.14  | Adipose - Subcutaneous                |
| -0.12 | Artery - Tibial                       |
| -0.18 | Nerve - Tibial                        |
| 0.2   | Adipose - Subcutaneous                |
|       |                                       |
| -0.31 | Adipose - Subcutaneous                |
| -0.32 | Adipose - Visceral (Omentum)          |
| -0.32 | Adipose - Visceral (Omentum)          |
| -0.4  | Adipose - Visceral (Omentum)          |
| -0.33 | Adipose - Visceral (Omentum)          |
| -0.23 | Adipose - Subcutaneous                |
| 0.12  | Whole Blood                           |
| -0.22 | Lung                                  |
| -0.28 | Adipose - Visceral (Omentum)          |
| -0.2  | Nerve - Tibial                        |
| -0.31 | Adrenal Gland                         |
| -0.24 | Lung                                  |
| -0.5  | Vagina                                |
| -0.23 | Esophagus - Muscularis                |
| -0.26 | Adipose - Subcutaneous                |
| -0.14 | Adipose - Subcutaneous                |
| 0.18  | Adipose - Subcutaneous                |
| -0.22 | Lung                                  |
| -0.14 | Brain - Frontal Cortex (BA9)          |
| -0.22 | Colon - Sigmoid                       |
| -0.17 | Artery - Aorta                        |
| 0.17  | Skin - Sun Exposed (Lower leg)        |
| 0.1   | Skin - Not Sun Exposed (Suprapubic)   |
|       |                                       |
| 0.49  | Esophagus - Mucosa                    |
| 0.42  | Skin - Sun Exposed (Lower leg)        |
| 0.45  | Skin - Not Sun Exposed (Suprapubic)   |
| -0.12 | Whole Blood                           |

|       |                                     |
|-------|-------------------------------------|
| 0.35  | Nerve - Tibial                      |
| 0.69  | Lung                                |
| 0.79  | Adipose - Subcutaneous              |
| 0.76  | Adipose - Visceral (Omentum)        |
| 0.75  | Breast - Mammary Tissue             |
| 0.75  | Spleen                              |
| 0.68  | Artery - Aorta                      |
| 0.79  | Artery - Coronary                   |
| 0.48  | Thyroid                             |
| 0.46  | Nerve - Tibial                      |
| 0.41  | Skin - Sun Exposed (Lower leg)      |
| -0.31 | Heart - Atrial Appendage            |
| 0.38  | Artery - Tibial                     |
| 0.45  | Colon - Transverse                  |
| 0.43  | Esophagus - Muscularis              |
| 0.39  | Skin - Not Sun Exposed (Suprapubic) |
| 0.86  | Uterus                              |
| -0.23 | Lung                                |
| 0.63  | Small Intestine - Terminal Ileum    |
| -0.13 | Whole Blood                         |
| 0.15  | Muscle - Skeletal                   |
| -0.42 | Testis                              |
| -0.17 | Artery - Tibial                     |
| -0.18 | Esophagus - Muscularis              |
| 0.35  | Testis                              |
| -0.27 | Skin - Not Sun Exposed (Suprapubic) |
