# Supplementary material for: Matrix Metalloproteinase Gene Polymorphisms Are Associated with Breast Cancer in the Caucasian Women of Russia
Source: MDPI journal article supplement (doi:10.3390/ijms232012638), 2022-10-20
Supplement: s1 [file s1]

Supplementary Table S13 Gene set enrichment analysis of biological pathways v  
(Gene Ontology Portal tools, <http://geneontology.org>).

| Database                       | Gene set                                      | Original # genes in gene set |
|--------------------------------|-----------------------------------------------|------------------------------|
| GO biological process complete |                                               | 11                           |
|                                | cellular response to UV-A                     |                              |
|                                | response to UV-A                              | 14                           |
|                                | response to UV                                | 150                          |
|                                | response to light stimulus                    | 311                          |
|                                | response to radiation                         | 439                          |
|                                | response to abiotic stimulus                  | 1106                         |
|                                | cellular response to UV                       | 91                           |
|                                | cellular response to light stimulus           | 116                          |
|                                | cellular response to radiation                | 181                          |
|                                | cellular response to abiotic stimulus         | 320                          |
|                                | cellular response to environmental stimulus   | 320                          |
|                                | collagen catabolic process                    | 38                           |
|                                | collagen metabolic process                    | 57                           |
|                                | extracellular matrix disassembly              | 47                           |
|                                | extracellular matrix organization             | 294                          |
|                                | extracellular structure organization          | 295                          |
|                                | external encapsulating structure organization | 297                          |
|                                | cellular component disassembly                | 300                          |
|                                | regulation of neuroinflammatory response      | 35                           |
|                                | endodermal cell differentiation               | 41                           |
|                                | endoderm formation                            | 51                           |
|                                | endoderm development                          | 77                           |
|                                | formation of primary germ layer               | 115                          |
|                                | gastrulation                                  | 162                          |
|                                | response to amyloid-beta                      | 49                           |
| GO molecular function complete |                                               | 114                          |
|                                | metalloendopeptidase activity                 |                              |
|                                | endopeptidase activity                        | 457                          |
|                                | peptidase activity                            | 643                          |
|                                | metallopeptidase activity                     | 190                          |
|                                | serine-type endopeptidase activity            | 180                          |
|                                | serine-type peptidase activity                | 198                          |
|                                | serine hydrolase activity                     | 202                          |
|                                | zinc ion binding                              | 837                          |

|                                    |                                               |      |
|------------------------------------|-----------------------------------------------|------|
|                                    | transition metal ion binding                  | 1113 |
| GO cellular component complete     |                                               | 572  |
|                                    | extracellular matrix                          |      |
|                                    | external encapsulating structure              | 573  |
| PANTHER Pathways                   | Plasminogen activating cascade                | 17   |
|                                    | Alzheimer disease-presenilin pathway          | 131  |
| PANTHER GO-Slim Molecular Function |                                               | 84   |
|                                    | metalloendopeptidase activity                 |      |
|                                    | endopeptidase activity                        | 324  |
|                                    | peptidase activity                            | 433  |
|                                    | hydrolase activity                            | 1739 |
|                                    | catalytic activity, acting on a protein       | 1473 |
|                                    | metallopeptidase activity                     | 116  |
| PANTHER GO-Slim Biological Process |                                               | 74   |
|                                    | extracellular matrix organization             |      |
|                                    | external encapsulating structure organization | 74   |
|                                    | cellular component organization               | 2518 |
|                                    | cellular component organization or biogenesis | 2644 |
|                                    | extracellular structure organization          | 75   |
|                                    | catabolic process                             | 893  |
| PANTHER Protein Class              |                                               | 155  |
|                                    | metalloprotease                               |      |
|                                    | protease                                      | 595  |
|                                    | protein modifying enzyme                      | 1622 |
| Reactome pathways                  |                                               | 33   |
|                                    | Activation of Matrix Metalloproteinases       |      |
|                                    | Degradation of the extracellular matrix       | 140  |
|                                    | Collagen degradation                          | 64   |
|                                    | Extra-nuclear estrogen signaling              | 73   |
|                                    | ESR-mediated signaling                        | 187  |
|                                    | Signaling by Nuclear Receptors                | 261  |
|                                    | Interleukin-4 and Interleukin-13 signaling    | 111  |
|                                    | Signaling by Interleukins                     | 448  |
|                                    | Cytokine Signaling in Immune system           | 697  |

with 9 BC-associated genes in breast (BC-associated polymorphisms functionality in breast)

| # genes in gene set analyzed<br>by Gene Ontology | Fold Enrichment | raw P-value     | FDR          |
|--------------------------------------------------|-----------------|-----------------|--------------|
| 4                                                | > 100           | 0.0000000000229 | 0.00000012   |
| 4                                                | > 100           | 0.0000000000513 | 0.000000161  |
| 4                                                | 61              | 0.000000368     | 0.00048      |
| 4                                                | 29.42           | 0.00000636      | 0.00525      |
| 4                                                | 20.84           | 0.0000244       | 0.0166       |
| 5                                                | 10.34           | 0.0000475       | 0.0298       |
| 4                                                | > 100           | 0.0000000526    | 0.000137     |
| 4                                                | 78.89           | 0.000000135     | 0.000192     |
| 4                                                | 50.56           | 0.000000766     | 0.000801     |
| 4                                                | 28.06           | 0.00000711      | 0.00558      |
| 4                                                | 28.06           | 0.00000711      | 0.00531      |
| 5                                                | > 100           | 0.0000000000039 | 0.0000000612 |
| 5                                                | > 100           | 0.0000000000262 | 0.000000102  |
| 5                                                | > 100           | 0.0000000000105 | 0.0000000825 |
| 5                                                | 38.91           | 0.0000000749    | 0.000168     |
| 5                                                | 38.77           | 0.0000000761    | 0.000149     |
| 5                                                | 38.51           | 0.0000000787    | 0.000137     |
| 5                                                | 38.13           | 0.0000000827    | 0.00013      |
| 3                                                | > 100           | 0.000000483     | 0.000582     |
| 3                                                | > 100           | 0.000000757     | 0.000848     |
| 3                                                | > 100           | 0.00000141      | 0.0013       |
| 3                                                | 89.13           | 0.00000466      | 0.00406      |
| 3                                                | 59.68           | 0.000015        | 0.0107       |
| 3                                                | 42.36           | 0.0000409       | 0.0267       |
| 3                                                | > 100           | 0.00000126      | 0.00124      |
| 5                                                | > 100           | 0.000000000731  | 0.00000359   |
| 5                                                | 25.03           | 0.00000065      | 0.000531     |
| 5                                                | 17.79           | 0.00000344      | 0.00241      |
| 5                                                | 60.2            | 0.00000000883   | 0.0000144    |
| 5                                                | 63.55           | 0.00000000678   | 0.0000166    |
| 5                                                | 57.77           | 0.0000000108    | 0.0000132    |
| 5                                                | 56.63           | 0.0000000119    | 0.0000117    |
| 5                                                | 13.67           | 0.0000124       | 0.0076       |

|   |       |                 |              |
|---|-------|-----------------|--------------|
| 5 | 10.28 | 0.000049        | 0.0267       |
| 5 | 20    | 0.00000195      | 0.00397      |
| 5 | 19.96 | 0.00000196      | 0.002        |
| 4 | > 100 | 0.0000000001    | 0.000000016  |
| 4 | 69.85 | 0.000000217     | 0.0000173    |
| 5 | > 100 | 0.000000000167  | 0.0000000912 |
| 5 | 35.3  | 0.000000121     | 0.0000219    |
| 5 | 26.42 | 0.000000499     | 0.0000681    |
| 5 | 6.58  | 0.000408        | 0.0371       |
| 5 | 7.77  | 0.000186        | 0.0204       |
| 5 | 98.61 | 0.000000000796  | 0.000000217  |
| 5 | > 100 | 0.0000000000909 | 0.000000202  |
| 5 | > 100 | 0.0000000000909 | 0.000000101  |
| 7 | 6.36  | 0.0000119       | 0.00658      |
| 7 | 6.06  | 0.0000165       | 0.00732      |
| 5 | > 100 | 0.0000000000969 | 0.0000000717 |
| 5 | 12.81 | 0.0000169       | 0.00627      |
| 5 | 73.8  | 0.00000000326   | 0.00000064   |
| 5 | 19.22 | 0.00000236      | 0.000231     |
| 5 | 7.05  | 0.000294        | 0.0192       |
| 5 | > 100 | 0.0000000000204 | 0.0000000508 |
| 5 | 81.7  | 0.00000000199   | 0.00000165   |
| 5 | > 100 | 0.0000000000454 | 0.0000000566 |
| 3 | 94.01 | 0.00000399      | 0.00166      |
| 3 | 36.7  | 0.0000623       | 0.0194       |
| 3 | 26.03 | 0.000165        | 0.0412       |
| 4 | 82.44 | 0.000000114     | 0.0000567    |
| 4 | 20.43 | 0.0000264       | 0.00941      |
| 4 | 13.13 | 0.000146        | 0.0405       |

ast)
