# Supplementary material for: Matrix Metalloproteinase Gene Polymorphisms Are Associated with Breast Cancer in the Caucasian Women of Russia
Source: MDPI journal article supplement (doi:10.3390/ijms232012638), 2022-10-20
Supplement: s1 [file s1]

Supplementary table S8 Effect of SNPs in high LD ( $r^2 \geq 0.80$ ) with the BC-associated polymorphisms of the *MM* (according to Genotype-Tissue Expression (GTEx) (<http://www.gtexportal.org/>)) (  $p < 8.0E5$ ,  $FDR \leq 0.05$ )

| Chr | Lead SNP  | Position lead<br>SNP(hg38) | Proxy SNP | Position proxy<br>SNP (hg38) | Distance (bp) between<br>proxy and lead SNP |
|-----|-----------|----------------------------|-----------|------------------------------|---------------------------------------------|
|     |           |                            |           |                              |                                             |
| 11  | rs1940475 | 102722517                  | rs2186602 | 102721214                    | 1303                                        |
| 11  | rs1940475 | 102722517                  | rs948218  | 102722311                    | 206                                         |
| 11  | rs1940475 | 102722517                  | rs1940474 | 102722322                    | 195                                         |
| 11  | rs1940475 | 102722517                  | rs7123658 | 102723248                    | -731                                        |
| 11  | rs1940475 | 102722517                  | rs6590983 | 102723645                    | -1128                                       |

|              |                     |           |       |
|--------------|---------------------|-----------|-------|
| 11 rs1940475 | 102722517 rs1939012 | 102724404 | -1887 |
|--------------|---------------------|-----------|-------|

|              |                     |           |       |
|--------------|---------------------|-----------|-------|
| 11 rs1940475 | 102722517 rs3765620 | 102724761 | -2244 |
|--------------|---------------------|-----------|-------|

|              |                      |           |       |
|--------------|----------------------|-----------|-------|
| 11 rs1940475 | 102722517 rs11225395 | 102725749 | -3232 |
|--------------|----------------------|-----------|-------|

|              |                      |           |       |
|--------------|----------------------|-----------|-------|
| 11 rs1940475 | 102722517 rs33952053 | 102726340 | -3823 |
|--------------|----------------------|-----------|-------|

|              |                     |           |       |
|--------------|---------------------|-----------|-------|
| 11 rs1940475 | 102722517 rs1939013 | 102727079 | -4562 |
|--------------|---------------------|-----------|-------|

|              |                     |           |       |
|--------------|---------------------|-----------|-------|
| 11 rs1940475 | 102722517 rs1939014 | 102727181 | -4664 |
|--------------|---------------------|-----------|-------|

|              |                     |           |       |
|--------------|---------------------|-----------|-------|
| 11 rs1940475 | 102722517 rs3758857 | 102727628 | -5111 |
|--------------|---------------------|-----------|-------|

|              |                     |           |       |
|--------------|---------------------|-----------|-------|
| 11 rs1940475 | 102722517 rs3758858 | 102727726 | -5209 |
|--------------|---------------------|-----------|-------|

|              |                     |           |       |
|--------------|---------------------|-----------|-------|
| 11 rs1940475 | 102722517 rs3758859 | 102727749 | -5232 |
|--------------|---------------------|-----------|-------|

|              |                     |           |       |
|--------------|---------------------|-----------|-------|
| 11 rs1940475 | 102722517 rs6590985 | 102727924 | -5407 |
|--------------|---------------------|-----------|-------|

|              |                     |           |       |
|--------------|---------------------|-----------|-------|
| 11 rs1940475 | 102722517 rs6590986 | 102728128 | -5611 |
|--------------|---------------------|-----------|-------|

|              |                      |           |       |
|--------------|----------------------|-----------|-------|
| 11 rs1940475 | 102722517 rs10750653 | 102729275 | -6758 |
|--------------|----------------------|-----------|-------|

|             |                    |           |       |
|-------------|--------------------|-----------|-------|
| 11 rs679620 | 102827993 rs526215 | 102807707 | 20286 |
|-------------|--------------------|-----------|-------|

|             |                     |           |       |
|-------------|---------------------|-----------|-------|
| 11 rs679620 | 102827993 rs1144396 | 102808321 | 19672 |
|-------------|---------------------|-----------|-------|

|             |                    |           |       |
|-------------|--------------------|-----------|-------|
| 11 rs679620 | 102827993 rs565082 | 102808927 | 19066 |
|-------------|--------------------|-----------|-------|

|             |                    |           |       |
|-------------|--------------------|-----------|-------|
| 11 rs679620 | 102827993 rs502174 | 102811772 | 16221 |
|-------------|--------------------|-----------|-------|

|             |                      |           |       |
|-------------|----------------------|-----------|-------|
| 11 rs679620 | 102827993 rs10791596 | 102816687 | 11306 |
|-------------|----------------------|-----------|-------|

|             |                     |           |      |
|-------------|---------------------|-----------|------|
| 11 rs679620 | 102827993 rs2097248 | 102819770 | 8223 |
|-------------|---------------------|-----------|------|

|    |          |                      |           |       |
|----|----------|----------------------|-----------|-------|
| 11 | rs679620 | 102827993 rs756544   | 102820431 | 7562  |
| 11 | rs679620 | 102827993 rs12804136 | 102820659 | 7334  |
| 11 | rs679620 | 102827993 rs11225434 | 102820751 | 7242  |
| 11 | rs679620 | 102827993 rs7117013  | 102821493 | 6500  |
| 11 | rs679620 | 102827993 rs10895364 | 102822132 | 5861  |
| 11 | rs679620 | 102827993 rs12801529 | 102822879 | 5114  |
| 11 | rs679620 | 102827993 rs10895365 | 102823462 | 4531  |
| 11 | rs679620 | 102827993 rs6590993  | 102825487 | 2506  |
| 11 | rs679620 | 102827993 rs6590994  | 102825901 | 2092  |
| 11 | rs679620 | 102827993 rs10895366 | 102826358 | 1635  |
| 11 | rs679620 | 102827993 rs7126392  | 102826390 | 1603  |
| 11 | rs679620 | 102827993 rs2212637  | 102826825 | 1168  |
| 11 | rs679620 | 102827993 rs12792871 | 102827605 | 388   |
| 11 | rs679620 | 102827993 rs1010698  | 102830290 | -2297 |

|    |          |                     |           |        |
|----|----------|---------------------|-----------|--------|
| 11 | rs679620 | 102827993 rs2155013 | 102831127 | -3134  |
| 11 | rs679620 | 102827993 rs4754884 | 102831532 | -3539  |
| 11 | rs679620 | 102827993 rs635746  | 102832897 | -4904  |
| 11 | rs679620 | 102827993 rs633962  | 102833340 | -5347  |
| 11 | rs679620 | 102827993 rs666734  | 102833449 | -5456  |
| 11 | rs679620 | 102827993 rs595840  | 102834166 | -6173  |
| 11 | rs679620 | 102827993 rs639752  | 102836608 | -8615  |
| 11 | rs679620 | 102827993 rs575027  | 102837183 | -9190  |
| 11 | rs679620 | 102827993 rs520540  | 102838694 | -10701 |
| 11 | rs679620 | 102827993 rs591058  | 102840607 | -12614 |
| 11 | rs679620 | 102827993 rs602128  | 102842734 | -14741 |
| 11 | rs679620 | 102827993 rs679620  | 102842889 | -14896 |
| 11 | rs679620 | 102827993 rs678815  | 102843046 | -15053 |
| 11 | rs679620 | 102827993 rs617819  | 102843985 | -15992 |
| 11 | rs679620 | 102827993 rs632478  | 102844950 | -16957 |
| 11 | rs679620 | 102827993 rs645419  | 102845590 | -17597 |

|             |                   |          |     |
|-------------|-------------------|----------|-----|
| 16 rs243865 | 55477894 rs243866 | 55477625 | 269 |
|-------------|-------------------|----------|-----|

|              |                    |          |       |
|--------------|--------------------|----------|-------|
| 20 rs3918242 | 46007337 rs1888235 | 45995328 | 12009 |
|--------------|--------------------|----------|-------|

|              |                    |          |      |
|--------------|--------------------|----------|------|
| 20 rs3918242 | 46007337 rs6073984 | 46002014 | 5323 |
|--------------|--------------------|----------|------|

|              |                    |          |      |
|--------------|--------------------|----------|------|
| 20 rs3918242 | 46007337 rs6065912 | 46003728 | 3609 |
|--------------|--------------------|----------|------|

|              |                    |          |     |
|--------------|--------------------|----------|-----|
| 20 rs3918242 | 46007337 rs3918241 | 46007096 | 241 |
|--------------|--------------------|----------|-----|

|              |                    |          |       |
|--------------|--------------------|----------|-------|
| 20 rs3918242 | 46007337 rs2274755 | 46011053 | -3716 |
|--------------|--------------------|----------|-------|

|              |                    |          |       |
|--------------|--------------------|----------|-------|
| 20 rs3918242 | 46007337 rs2236416 | 46011936 | -4599 |
|--------------|--------------------|----------|-------|

|              |                  |          |       |
|--------------|------------------|----------|-------|
| 20 rs3918242 | 46007337 rs17577 | 46014472 | -7135 |
|--------------|------------------|----------|-------|



|              |                    |          |       |
|--------------|--------------------|----------|-------|
| 20 rs3918242 | 46007337 rs3918261 | 46014953 | -7616 |
|--------------|--------------------|----------|-------|

|              |                  |          |       |
|--------------|------------------|----------|-------|
| 20 rs3918242 | 46007337 rs13925 | 46016326 | -8989 |
|--------------|------------------|----------|-------|

|              |                    |          |       |
|--------------|--------------------|----------|-------|
| 20 rs3918242 | 46007337 rs3918270 | 46016700 | -9363 |
|--------------|--------------------|----------|-------|

|              |                    |          |       |
|--------------|--------------------|----------|-------|
| 20 rs3918242 | 46007337 rs3918271 | 46016954 | -9617 |
|--------------|--------------------|----------|-------|

|              |                     |          |        |
|--------------|---------------------|----------|--------|
| 20 rs3918242 | 46007337 rs66553311 | 46020003 | -12666 |
|--------------|---------------------|----------|--------|

|              |                     |          |        |
|--------------|---------------------|----------|--------|
| 20 rs3918242 | 46007337 rs10432735 | 46021679 | -14342 |
|--------------|---------------------|----------|--------|

|              |                    |          |       |
|--------------|--------------------|----------|-------|
| 20 rs3918249 | 46009497 rs6017721 | 45987758 | 21739 |
|--------------|--------------------|----------|-------|

20 rs3918249

46009497 rs3848721

46005037

4460

20 rs3918249

46009497 rs3848722

46005181

4316

20 rs3918249

46009497 rs4810482

46005911

3586

20 rs3918249

46009497 rs3761158

46006273

3224

20 rs3918249

46009497 rs3761159

46006318

3179

20 rs3918249

46009497 rs6065913

46006464

3033

20 rs3918249

46009497 rs3918240

46006977

2520

20 rs3918249

46009497 rs3918251

46010142

-645

20 rs3918249

46009497 rs17576

46011586

-2089

20 rs3918249

46009497 rs13969

46014194

-4697

20 rs17576

46011586 rs6017721

45987758

23828

|            |                    |          |      |
|------------|--------------------|----------|------|
| 20 rs17576 | 46011586 rs3848721 | 46005037 | 6549 |
|------------|--------------------|----------|------|

|            |                    |          |      |
|------------|--------------------|----------|------|
| 20 rs17576 | 46011586 rs3848722 | 46005181 | 6405 |
|------------|--------------------|----------|------|



|            |                    |          |      |
|------------|--------------------|----------|------|
| 20 rs17576 | 46011586 rs4810482 | 46005911 | 5675 |
|------------|--------------------|----------|------|

|            |                    |          |      |
|------------|--------------------|----------|------|
| 20 rs17576 | 46011586 rs3761158 | 46006273 | 5313 |
|------------|--------------------|----------|------|

|            |                    |          |      |
|------------|--------------------|----------|------|
| 20 rs17576 | 46011586 rs3761159 | 46006318 | 5268 |
|------------|--------------------|----------|------|

|            |                    |          |      |
|------------|--------------------|----------|------|
| 20 rs17576 | 46011586 rs6065913 | 46006464 | 5122 |
|------------|--------------------|----------|------|

|            |                    |          |      |
|------------|--------------------|----------|------|
| 20 rs17576 | 46011586 rs3918240 | 46006977 | 4609 |
|------------|--------------------|----------|------|

|            |                    |          |      |
|------------|--------------------|----------|------|
| 20 rs17576 | 46011586 rs3918249 | 46009497 | 2089 |
|------------|--------------------|----------|------|

|            |                    |          |      |
|------------|--------------------|----------|------|
| 20 rs17576 | 46011586 rs3918251 | 46010142 | 1444 |
|------------|--------------------|----------|------|

|            |                  |          |       |
|------------|------------------|----------|-------|
| 20 rs17576 | 46011586 rs13969 | 46014194 | -2608 |
|------------|------------------|----------|-------|

|              |                     |          |       |
|--------------|---------------------|----------|-------|
| 20 rs3787268 | 46013092 rs35610751 | 45991015 | 22077 |
|--------------|---------------------|----------|-------|

|              |                    |          |       |
|--------------|--------------------|----------|-------|
| 20 rs3787268 | 46013092 rs6073980 | 45991065 | 22027 |
|--------------|--------------------|----------|-------|

|              |                    |          |       |
|--------------|--------------------|----------|-------|
| 20 rs3787268 | 46013092 rs6073983 | 46001252 | 11840 |
|--------------|--------------------|----------|-------|

|              |                    |          |      |
|--------------|--------------------|----------|------|
| 20 rs3787268 | 46013092 rs3761157 | 46006183 | 6909 |
|--------------|--------------------|----------|------|

|              |                     |          |        |
|--------------|---------------------|----------|--------|
| 20 rs3787268 | 46013092 rs3918262  | 46015131 | -2039  |
| 20 rs3787268 | 46013092 rs6073989  | 46022571 | -9479  |
| 20 rs3787268 | 46013092 rs16991010 | 46023675 | -10583 |
| 20 rs3787268 | 46013092 rs6130998  | 46024480 | -11388 |
| 20 rs3787268 | 46013092 rs6130999  | 46026853 | -13761 |
| 20 rs3787268 | 46013092 rs6073991  | 46027473 | -14381 |
| 20 rs3787268 | 46013092 rs13039389 | 46031067 | -17975 |

|              |                    |          |        |
|--------------|--------------------|----------|--------|
| 20 rs3787268 | 46013092 rs6131001 | 46032717 | -19625 |
|--------------|--------------------|----------|--------|

|              |                    |          |        |
|--------------|--------------------|----------|--------|
| 20 rs2250889 | 46013767 rs6094239 | 46024910 | -11143 |
|--------------|--------------------|----------|--------|

|            |                    |          |       |
|------------|--------------------|----------|-------|
| 20 rs17577 | 46014472 rs1888235 | 45995328 | 19144 |
|------------|--------------------|----------|-------|

|            |                    |          |       |
|------------|--------------------|----------|-------|
| 20 rs17577 | 46014472 rs6073984 | 46002014 | 12458 |
|------------|--------------------|----------|-------|

|            |                    |          |       |
|------------|--------------------|----------|-------|
| 20 rs17577 | 46014472 rs6065912 | 46003728 | 10744 |
|------------|--------------------|----------|-------|

|            |                    |          |      |
|------------|--------------------|----------|------|
| 20 rs17577 | 46014472 rs3918241 | 46007096 | 7376 |
|------------|--------------------|----------|------|

|            |                    |          |      |
|------------|--------------------|----------|------|
| 20 rs17577 | 46014472 rs3918242 | 46007337 | 7135 |
|------------|--------------------|----------|------|

|            |                    |          |      |
|------------|--------------------|----------|------|
| 20 rs17577 | 46014472 rs2274755 | 46011053 | 3419 |
|------------|--------------------|----------|------|



|            |                    |          |      |
|------------|--------------------|----------|------|
| 20 rs17577 | 46014472 rs2236416 | 46011936 | 2536 |
|------------|--------------------|----------|------|

|            |                    |          |      |
|------------|--------------------|----------|------|
| 20 rs17577 | 46014472 rs3918261 | 46014953 | -481 |
|------------|--------------------|----------|------|

|            |                  |          |       |
|------------|------------------|----------|-------|
| 20 rs17577 | 46014472 rs13925 | 46016326 | -1854 |
|------------|------------------|----------|-------|

|            |                    |          |       |
|------------|--------------------|----------|-------|
| 20 rs17577 | 46014472 rs3918270 | 46016700 | -2228 |
|------------|--------------------|----------|-------|

|            |                    |          |       |
|------------|--------------------|----------|-------|
| 20 rs17577 | 46014472 rs3918271 | 46016954 | -2482 |
|------------|--------------------|----------|-------|

|            |                     |          |       |
|------------|---------------------|----------|-------|
| 20 rs17577 | 46014472 rs66553311 | 46020003 | -5531 |
|------------|---------------------|----------|-------|

|            |                     |          |       |
|------------|---------------------|----------|-------|
| 20 rs17577 | 46014472 rs10432735 | 46021679 | -7207 |
|------------|---------------------|----------|-------|

1P genes on gene expression level

| r2 between<br>lead and<br>proxy | D between<br>lead and<br>proxy | Gene Symbol          | p                   | Effect Size ( $\beta$ ) | Tissue       |
|---------------------------------|--------------------------------|----------------------|---------------------|-------------------------|--------------|
| 0.85                            | 1                              | <i>MMP27</i>         | 0.00000000000000035 | 0.29                    | Whole Blo    |
|                                 |                                | <i>MMP27</i>         | 0.0000000000000008  | -0.21                   | Skin - Sun E |
|                                 |                                | <i>MMP27</i>         | 0.000000000000019   | -0.2                    | Adipose - S  |
|                                 |                                | <i>MMP27</i>         | 0.000000000000091   | -0.21                   | Skin - Not S |
|                                 |                                | <i>MMP27</i>         | 0.0000000051        | -0.22                   | Muscle - Sk  |
|                                 |                                | <i>RP11-817J15.3</i> | 0.0000015           | 0.16                    | Whole Blo    |
|                                 |                                | <i>RP11-817J15.3</i> | 0.0000021           | -0.47                   | Liver        |
|                                 |                                | <i>MMP27</i>         | 0.0000085           | 0.31                    | Spleen       |
|                                 |                                | <i>MMP27</i>         | 0.00005             | -0.13                   | Cells - Cult |
|                                 |                                | <i>MMP27</i>         | 0.000091            | -0.17                   | Adipose - V  |
| 0.85                            | 1                              | <i>MMP27</i>         | 0.00000000000000035 | 0.29                    | Whole Blo    |
|                                 |                                | <i>MMP27</i>         | 0.0000000000000008  | -0.21                   | Skin - Sun E |
|                                 |                                | <i>MMP27</i>         | 0.000000000000019   | -0.2                    | Adipose - S  |
|                                 |                                | <i>MMP27</i>         | 0.000000000000091   | -0.21                   | Skin - Not S |
|                                 |                                | <i>MMP27</i>         | 0.0000000051        | -0.22                   | Muscle - Sk  |
|                                 |                                | <i>RP11-817J15.3</i> | 0.0000015           | 0.16                    | Whole Blo    |
|                                 |                                | <i>RP11-817J15.3</i> | 0.0000021           | -0.47                   | Liver        |
|                                 |                                | <i>MMP27</i>         | 0.0000085           | 0.31                    | Spleen       |
|                                 |                                | <i>MMP27</i>         | 0.00005             | -0.13                   | Cells - Cult |
|                                 |                                | <i>MMP27</i>         | 0.000091            | -0.17                   | Adipose - V  |
| 1                               | 1                              | <i>MMP27</i>         | 0.000000000000011   | 0.24                    | Whole Blo    |
|                                 |                                | <i>MMP27</i>         | 0.000000000000014   | -0.17                   | Skin - Sun E |
|                                 |                                | <i>MMP27</i>         | 0.0000000043        | -0.18                   | Skin - Not S |
|                                 |                                | <i>RP11-817J15.3</i> | 0.000000073         | 0.17                    | Whole Blo    |
|                                 |                                | <i>MMP27</i>         | 0.00000012          | -0.15                   | Adipose - S  |
|                                 |                                | <i>RP11-817J15.3</i> | 0.0000053           | -0.43                   | Liver        |
|                                 |                                | <i>MMP27</i>         | 0.000007            | -0.18                   | Muscle - Sk  |
|                                 |                                | <i>RP11-817J15.3</i> | 0.000046            | -0.36                   | Small Intes  |
|                                 |                                | <i>MMP27</i>         | 0.00000000000000035 | 0.29                    | Whole Blo    |
| 0.85                            | 1                              | <i>MMP27</i>         | 0.0000000000000008  | -0.21                   | Skin - Sun E |
|                                 |                                | <i>MMP27</i>         | 0.000000000000019   | -0.2                    | Adipose - S  |
|                                 |                                | <i>MMP27</i>         | 0.000000000000091   | -0.21                   | Skin - Not S |
|                                 |                                | <i>MMP27</i>         | 0.0000000051        | -0.22                   | Muscle - Sk  |
|                                 |                                | <i>RP11-817J15.3</i> | 0.0000015           | 0.16                    | Whole Blo    |
|                                 |                                | <i>RP11-817J15.3</i> | 0.0000021           | -0.47                   | Liver        |
|                                 |                                | <i>MMP27</i>         | 0.0000085           | 0.31                    | Spleen       |
|                                 |                                | <i>MMP27</i>         | 0.00005             | -0.13                   | Cells - Cult |
|                                 |                                | <i>MMP27</i>         | 0.000091            | -0.17                   | Adipose - V  |
|                                 |                                | <i>MMP27</i>         | 0.00000000000000035 | 0.29                    | Whole Blo    |
| 0.85                            | 1                              | <i>MMP27</i>         | 0.0000000000000008  | -0.21                   | Skin - Sun E |
|                                 |                                | <i>MMP27</i>         | 0.000000000000019   | -0.2                    | Adipose - S  |
|                                 |                                | <i>MMP27</i>         | 0.000000000000035   | 0.29                    | Whole Blo    |

|      |   |                      |                     |       |               |
|------|---|----------------------|---------------------|-------|---------------|
|      |   | <i>MMP27</i>         | 0.000000000091      | -0.21 | Skin - Not S  |
|      |   | <i>MMP27</i>         | 0.000000051         | -0.22 | Muscle - Sk   |
|      |   | <i>RP11-817J15.3</i> | 0.0000015           | 0.16  | Whole Bloc    |
|      |   | <i>RP11-817J15.3</i> | 0.0000021           | -0.47 | Liver         |
|      |   | <i>MMP27</i>         | 0.0000085           | 0.31  | Spleen        |
|      |   | <i>MMP27</i>         | 0.00005             | -0.13 | Cells - Culti |
|      |   | <i>MMP27</i>         | 0.000091            | -0.17 | Adipose - V   |
| 1    | 1 | <i>MMP27</i>         | 0.0000000000013     | 0.24  | Whole Bloc    |
|      |   | <i>MMP27</i>         | 0.0000000000022     | -0.18 | Skin - Sun E  |
|      |   | <i>MMP27</i>         | 0.0000000045        | -0.19 | Skin - Not S  |
|      |   | <i>MMP27</i>         | 0.000000071         | -0.15 | Adipose - S   |
|      |   | <i>RP11-817J15.3</i> | 0.000000078         | 0.17  | Whole Bloc    |
|      |   | <i>RP11-817J15.3</i> | 0.0000031           | -0.44 | Liver         |
|      |   | <i>MMP27</i>         | 0.000011            | -0.17 | Muscle - Sk   |
| 0.85 | 1 | <i>MMP27</i>         | 0.00000000000000035 | 0.29  | Whole Bloc    |
|      |   | <i>MMP27</i>         | 0.000000000000008   | -0.21 | Skin - Sun E  |
|      |   | <i>MMP27</i>         | 0.0000000000019     | -0.2  | Adipose - S   |
|      |   | <i>MMP27</i>         | 0.000000000091      | -0.21 | Skin - Not S  |
|      |   | <i>MMP27</i>         | 0.000000051         | -0.22 | Muscle - Sk   |
|      |   | <i>RP11-817J15.3</i> | 0.0000015           | 0.16  | Whole Bloc    |
|      |   | <i>RP11-817J15.3</i> | 0.0000021           | -0.47 | Liver         |
|      |   | <i>MMP27</i>         | 0.0000085           | 0.31  | Spleen        |
|      |   | <i>MMP27</i>         | 0.00005             | -0.13 | Cells - Culti |
|      |   | <i>MMP27</i>         | 0.000091            | -0.17 | Adipose - V   |
| 0.84 | 1 | <i>MMP27</i>         | 0.00000000000000035 | 0.29  | Whole Bloc    |
|      |   | <i>MMP27</i>         | 0.000000000000008   | -0.21 | Skin - Sun E  |
|      |   | <i>MMP27</i>         | 0.0000000000019     | -0.2  | Adipose - S   |
|      |   | <i>MMP27</i>         | 0.000000000091      | -0.21 | Skin - Not S  |
|      |   | <i>MMP27</i>         | 0.000000051         | -0.22 | Muscle - Sk   |
|      |   | <i>RP11-817J15.3</i> | 0.0000015           | 0.16  | Whole Bloc    |
|      |   | <i>RP11-817J15.3</i> | 0.0000021           | -0.47 | Liver         |
|      |   | <i>MMP27</i>         | 0.0000085           | 0.31  | Spleen        |
|      |   | <i>MMP27</i>         | 0.00005             | -0.13 | Cells - Culti |
|      |   | <i>MMP27</i>         | 0.000091            | -0.17 | Adipose - V   |
| 0.84 | 1 | <i>MMP27</i>         | 0.00000000000000035 | 0.29  | Whole Bloc    |
|      |   | <i>MMP27</i>         | 0.000000000000008   | -0.21 | Skin - Sun E  |
|      |   | <i>MMP27</i>         | 0.0000000000019     | -0.2  | Adipose - S   |
|      |   | <i>MMP27</i>         | 0.000000000091      | -0.21 | Skin - Not S  |
|      |   | <i>MMP27</i>         | 0.000000051         | -0.22 | Muscle - Sk   |
|      |   | <i>RP11-817J15.3</i> | 0.0000015           | 0.16  | Whole Bloc    |
|      |   | <i>RP11-817J15.3</i> | 0.0000021           | -0.47 | Liver         |
|      |   | <i>MMP27</i>         | 0.0000085           | 0.31  | Spleen        |
|      |   | <i>MMP27</i>         | 0.00005             | -0.13 | Cells - Culti |
|      |   | <i>MMP27</i>         | 0.000091            | -0.17 | Adipose - V   |
| 0.84 | 1 | <i>MMP27</i>         | 0.00000000000000049 | 0.29  | Whole Bloc    |
|      |   | <i>MMP27</i>         | 0.0000000000000012  | -0.21 | Skin - Sun E  |
|      |   | <i>MMP27</i>         | 0.0000000000012     | -0.2  | Adipose - S   |

|      |   |               |                      |       |               |
|------|---|---------------|----------------------|-------|---------------|
|      |   | MMP27         | 0.00000000012        | -0.21 | Skin - Not S  |
|      |   | MMP27         | 0.000000052          | -0.22 | Muscle - Sk   |
|      |   | RP11-817J15.3 | 0.0000018            | 0.15  | Whole Bloc    |
|      |   | RP11-817J15.3 | 0.0000035            | -0.46 | Liver         |
|      |   | MMP27         | 0.000016             | 0.3   | Spleen        |
|      |   | MMP27         | 0.000056             | -0.13 | Cells - Cultu |
|      |   | MMP27         | 0.000091             | -0.17 | Adipose - V   |
| 0.84 | 1 | MMP27         | 0.000000000000000035 | 0.29  | Whole Bloc    |
|      |   | MMP27         | 0.00000000000000008  | -0.21 | Skin - Sun E  |
|      |   | MMP27         | 0.000000000019       | -0.2  | Adipose - S   |
|      |   | MMP27         | 0.00000000012        | -0.21 | Skin - Not S  |
|      |   | MMP27         | 0.000000051          | -0.22 | Muscle - Sk   |
|      |   | RP11-817J15.3 | 0.0000015            | 0.16  | Whole Bloc    |
|      |   | RP11-817J15.3 | 0.0000035            | -0.46 | Liver         |
|      |   | MMP27         | 0.0000085            | 0.31  | Spleen        |
|      |   | MMP27         | 0.00005              | -0.13 | Cells - Cultu |
|      |   | MMP27         | 0.000091             | -0.17 | Adipose - V   |
| 0.84 | 1 | MMP27         | 0.000000000000000035 | 0.29  | Whole Bloc    |
|      |   | MMP27         | 0.00000000000000008  | -0.21 | Skin - Sun E  |
|      |   | MMP27         | 0.000000000019       | -0.2  | Adipose - S   |
|      |   | MMP27         | 0.00000000012        | -0.21 | Skin - Not S  |
|      |   | MMP27         | 0.000000051          | -0.22 | Muscle - Sk   |
|      |   | RP11-817J15.3 | 0.0000015            | 0.16  | Whole Bloc    |
|      |   | RP11-817J15.3 | 0.0000035            | -0.46 | Liver         |
|      |   | MMP27         | 0.0000085            | 0.31  | Spleen        |
|      |   | MMP27         | 0.00005              | -0.13 | Cells - Cultu |
|      |   | MMP27         | 0.000091             | -0.17 | Adipose - V   |
| 0.84 | 1 | MMP27         | 0.000000000000000035 | 0.29  | Whole Bloc    |
|      |   | MMP27         | 0.00000000000000008  | -0.21 | Skin - Sun E  |
|      |   | MMP27         | 0.000000000019       | -0.2  | Adipose - S   |
|      |   | MMP27         | 0.00000000012        | -0.21 | Skin - Not S  |
|      |   | MMP27         | 0.000000051          | -0.22 | Muscle - Sk   |
|      |   | RP11-817J15.3 | 0.0000015            | 0.16  | Whole Bloc    |
|      |   | RP11-817J15.3 | 0.0000035            | -0.46 | Liver         |
|      |   | MMP27         | 0.0000085            | 0.31  | Spleen        |
|      |   | MMP27         | 0.00005              | -0.13 | Cells - Cultu |
|      |   | MMP27         | 0.000091             | -0.17 | Adipose - V   |
| 0.99 | 1 | MMP27         | 0.0000000000011      | 0.24  | Whole Bloc    |
|      |   | MMP27         | 0.000000000014       | -0.17 | Skin - Sun E  |
|      |   | MMP27         | 0.000000054          | -0.18 | Skin - Not S  |
|      |   | RP11-817J15.3 | 0.000000073          | 0.17  | Whole Bloc    |
|      |   | MMP27         | 0.00000012           | -0.15 | Adipose - S   |
|      |   | MMP27         | 0.000007             | -0.18 | Muscle - Sk   |
|      |   | RP11-817J15.3 | 0.0000086            | -0.42 | Liver         |
|      |   | RP11-817J15.3 | 0.000046             | -0.36 | Small Intes   |
| 0.84 | 1 | MMP27         | 0.000000000000000035 | 0.29  | Whole Bloc    |
|      |   | MMP27         | 0.00000000000000008  | -0.21 | Skin - Sun E  |

|      |       |                      |                        |       |               |
|------|-------|----------------------|------------------------|-------|---------------|
|      |       | <i>MMP27</i>         | 0.000000000019         | -0.2  | Adipose - S   |
|      |       | <i>MMP27</i>         | 0.000000000012         | -0.21 | Skin - Not S  |
|      |       | <i>MMP27</i>         | 0.0000000051           | -0.22 | Muscle - Sk   |
|      |       | <i>RP11-817J15.3</i> | 0.00000015             | 0.16  | Whole Bloc    |
|      |       | <i>RP11-817J15.3</i> | 0.00000035             | -0.46 | Liver         |
|      |       | <i>MMP27</i>         | 0.00000085             | 0.31  | Spleen        |
|      |       | <i>MMP27</i>         | 0.000005               | -0.13 | Cells - Cultu |
|      |       | <i>MMP27</i>         | 0.0000091              | -0.17 | Adipose - V   |
| 0.84 | 1     | <i>MMP27</i>         | 0.00000000000000000035 | 0.29  | Whole Bloc    |
|      |       | <i>MMP27</i>         | 0.000000000000000008   | -0.21 | Skin - Sun E  |
|      |       | <i>MMP27</i>         | 0.00000000000019       | -0.2  | Adipose - S   |
|      |       | <i>MMP27</i>         | 0.000000000012         | -0.21 | Skin - Not S  |
|      |       | <i>MMP27</i>         | 0.0000000051           | -0.22 | Muscle - Sk   |
|      |       | <i>RP11-817J15.3</i> | 0.00000015             | 0.16  | Whole Bloc    |
|      |       | <i>RP11-817J15.3</i> | 0.00000035             | -0.46 | Liver         |
|      |       | <i>MMP27</i>         | 0.00000085             | 0.31  | Spleen        |
|      |       | <i>MMP27</i>         | 0.000005               | -0.13 | Cells - Cultu |
|      |       | <i>MMP27</i>         | 0.0000091              | -0.17 | Adipose - V   |
| 0.84 | 1     | <i>MMP27</i>         | 0.00000000000000000018 | 0.29  | Whole Bloc    |
|      |       | <i>MMP27</i>         | 0.000000000000000023   | -0.2  | Skin - Sun E  |
|      |       | <i>MMP27</i>         | 0.00000000000015       | -0.2  | Adipose - S   |
|      |       | <i>MMP27</i>         | 0.000000000062         | -0.2  | Skin - Not S  |
|      |       | <i>MMP27</i>         | 0.0000000061           | -0.22 | Muscle - Sk   |
|      |       | <i>RP11-817J15.3</i> | 0.00000026             | 0.15  | Whole Bloc    |
|      |       | <i>RP11-817J15.3</i> | 0.0000004              | -0.45 | Liver         |
|      |       | <i>MMP27</i>         | 0.0000007              | 0.31  | Spleen        |
|      |       | <i>MMP27</i>         | 0.0000066              | -0.19 | Colon - Tra   |
|      |       | <i>MMP27</i>         | 0.0000075              | -0.13 | Cells - Cultu |
|      |       | <i>MMP27</i>         | 0.0000098              | -0.17 | Adipose - V   |
| 0.82 | -0.92 | <i>WTAPP1</i>        | 0.00000000021          | -0.28 | Testis        |
|      |       | <i>MMP1</i>          | 0.00000000022          | -0.34 | Cells - Tran  |
|      |       | <i>MMP1</i>          | 0.00000088             | -0.33 | Heart - Left  |
|      |       | <i>MMP1</i>          | 0.0000038              | -0.31 | Nerve - Tib   |
| 0.81 | -0.92 | <i>WTAPP1</i>        | 0.000000000097         | -0.28 | Testis        |
|      |       | <i>MMP1</i>          | 0.00000000016          | -0.32 | Cells - Tran  |
|      |       | <i>MMP1</i>          | 0.0000004              | -0.33 | Heart - Left  |
| 0.82 | -0.92 | <i>MMP1</i>          | 0.000000000039         | -0.33 | Cells - Tran  |
|      |       | <i>WTAPP1</i>        | 0.000000000075         | -0.29 | Testis        |
|      |       | <i>MMP1</i>          | 0.00000016             | -0.35 | Heart - Left  |
| 0.81 | -0.91 | <i>MMP1</i>          | 0.000000000055         | -0.33 | Cells - Tran  |
|      |       | <i>WTAPP1</i>        | 0.000000000075         | -0.29 | Testis        |
|      |       | <i>MMP1</i>          | 0.00000032             | -0.34 | Heart - Left  |
| 0.83 | -0.93 | <i>MMP1</i>          | 0.000000000017         | -0.34 | Cells - Tran  |
|      |       | <i>WTAPP1</i>        | 0.000000000024         | -0.28 | Testis        |
|      |       | <i>MMP1</i>          | 0.00000029             | -0.34 | Heart - Left  |
| 0.89 | -0.96 | <i>WTAPP1</i>        | 0.000000000032         | -0.3  | Testis        |

|      |       |               |                |       |              |
|------|-------|---------------|----------------|-------|--------------|
|      |       | <i>MMP1</i>   | 0.0000000018   | -0.32 | Cells - Tran |
|      |       | <i>MMP1</i>   | 0.000004       | -0.33 | Heart - Left |
| 0.9  | -0.96 | <i>WTAPP1</i> | 0.00000000018  | -0.3  | Testis       |
|      |       | <i>MMP1</i>   | 0.00000000091  | -0.33 | Cells - Tran |
|      |       | <i>MMP1</i>   | 0.0000098      | -0.32 | Heart - Left |
|      |       | <i>MMP1</i>   | 0.000042       | -0.24 | Artery - Tib |
| 0.91 | -0.97 | <i>MMP1</i>   | 0.00000000059  | -0.33 | Cells - Tran |
|      |       | <i>WTAPP1</i> | 0.00000000017  | -0.29 | Testis       |
|      |       | <i>MMP1</i>   | 0.0000026      | -0.35 | Heart - Left |
|      |       | <i>MMP1</i>   | 0.000048       | -0.24 | Artery - Tib |
| 0.9  | -0.97 | <i>MMP1</i>   | 0.00000000083  | -0.33 | Cells - Tran |
|      |       | <i>WTAPP1</i> | 0.00000000012  | -0.29 | Testis       |
|      |       | <i>MMP1</i>   | 0.0000019      | -0.35 | Heart - Left |
| 0.91 | -0.97 | <i>MMP1</i>   | 0.00000000015  | -0.32 | Cells - Tran |
|      |       | <i>WTAPP1</i> | 0.00000000038  | -0.28 | Testis       |
|      |       | <i>MMP1</i>   | 0.0000072      | -0.32 | Heart - Left |
| 0.91 | -0.97 | <i>MMP1</i>   | 0.00000000015  | -0.32 | Cells - Tran |
|      |       | <i>WTAPP1</i> | 0.00000000038  | -0.28 | Testis       |
|      |       | <i>MMP1</i>   | 0.000007       | -0.32 | Heart - Left |
| 0.92 | -0.98 | <i>WTAPP1</i> | 0.000000000029 | -0.31 | Testis       |
|      |       | <i>MMP1</i>   | 0.00000000064  | -0.33 | Cells - Tran |
|      |       | <i>MMP1</i>   | 0.000002       | -0.34 | Heart - Left |
|      |       | <i>MMP1</i>   | 0.00007        | -0.23 | Artery - Tib |
| 0.92 | -0.98 | <i>WTAPP1</i> | 0.000000000026 | -0.31 | Testis       |
|      |       | <i>MMP1</i>   | 0.00000000064  | -0.33 | Cells - Tran |
|      |       | <i>MMP1</i>   | 0.0000021      | -0.34 | Heart - Left |
|      |       | <i>MMP1</i>   | 0.00007        | -0.23 | Artery - Tib |
| 0.89 | -0.96 | <i>WTAPP1</i> | 0.000000000031 | -0.32 | Testis       |
|      |       | <i>MMP1</i>   | 0.00000000064  | -0.33 | Cells - Tran |
|      |       | <i>MMP1</i>   | 0.0000021      | -0.34 | Heart - Left |
| 0.92 | -0.98 | <i>WTAPP1</i> | 0.00000000018  | -0.3  | Testis       |
|      |       | <i>MMP1</i>   | 0.00000000035  | -0.34 | Cells - Tran |
|      |       | <i>MMP1</i>   | 0.00001        | -0.32 | Heart - Left |
|      |       | <i>MMP1</i>   | 0.000063       | -0.23 | Artery - Tib |
| 0.96 | -0.98 | <i>WTAPP1</i> | 0.00000000057  | -0.28 | Testis       |
|      |       | <i>MMP1</i>   | 0.00000004     | -0.31 | Cells - Tran |
|      |       | <i>MMP1</i>   | 0.000029       | -0.31 | Heart - Left |
| 0.96 | -0.98 | <i>WTAPP1</i> | 0.000000000054 | -0.31 | Testis       |
|      |       | <i>MMP1</i>   | 0.00000000037  | -0.31 | Cells - Tran |
|      |       | <i>MMP1</i>   | 0.0000019      | -0.34 | Heart - Left |
| 0.94 | -0.97 | <i>WTAPP1</i> | 0.00000000067  | -0.29 | Testis       |
|      |       | <i>MMP1</i>   | 0.00000000065  | -0.31 | Cells - Tran |
|      |       | <i>MMP1</i>   | 0.0000036      | -0.33 | Heart - Left |
| 0.96 | -0.98 | <i>WTAPP1</i> | 0.00000000057  | -0.28 | Testis       |
|      |       | <i>MMP1</i>   | 0.00000004     | -0.31 | Cells - Tran |
| 0.98 | -1    | <i>WTAPP1</i> | 0.000000000024 | -0.31 | Testis       |
|      |       | <i>MMP1</i>   | 0.00000000035  | -0.32 | Cells - Tran |

|      |      |               |               |       |              |
|------|------|---------------|---------------|-------|--------------|
|      |      | <i>MMP1</i>   | 0.0000029     | -0.33 | Heart - Left |
| 0.98 | -1   | <i>WTAPP1</i> | 0.00000000026 | -0.3  | Testis       |
|      |      | <i>MMP1</i>   | 0.0000000036  | -0.31 | Cells - Tran |
|      |      | <i>MMP1</i>   | 0.0000039     | -0.33 | Heart - Left |
| 0.98 | -1   | <i>WTAPP1</i> | 0.00000000064 | -0.31 | Testis       |
|      |      | <i>MMP1</i>   | 0.0000000055  | -0.31 | Cells - Tran |
|      |      | <i>MMP1</i>   | 0.0000029     | -0.33 | Heart - Left |
| 0.99 | 1    | <i>WTAPP1</i> | 0.00000000084 | 0.29  | Testis       |
|      |      | <i>MMP1</i>   | 0.0000000035  | 0.31  | Cells - Tran |
|      |      | <i>MMP1</i>   | 0.000018      | 0.31  | Heart - Left |
| 0.99 | 1    | <i>MMP1</i>   | 0.0000000065  | 0.31  | Cells - Tran |
|      |      | <i>WTAPP1</i> | 0.000000015   | 0.27  | Testis       |
|      |      | <i>MMP1</i>   | 0.000029      | 0.3   | Heart - Left |
| 0.99 | 1    | <i>WTAPP1</i> | 0.00000000084 | 0.29  | Testis       |
|      |      | <i>MMP1</i>   | 0.0000000035  | 0.31  | Cells - Tran |
|      |      | <i>MMP1</i>   | 0.000019      | 0.31  | Heart - Left |
| 0.99 | 1    | <i>WTAPP1</i> | 0.00000000023 | 0.29  | Testis       |
|      |      | <i>MMP1</i>   | 0.0000000031  | 0.32  | Cells - Tran |
|      |      | <i>MMP1</i>   | 0.000014      | 0.31  | Heart - Left |
| 0.99 | 1    | <i>MMP1</i>   | 0.0000000065  | 0.31  | Cells - Tran |
|      |      | <i>WTAPP1</i> | 0.000000015   | 0.27  | Testis       |
|      |      | <i>MMP1</i>   | 0.00003       | 0.3   | Heart - Left |
| 0.98 | 0.99 | <i>WTAPP1</i> | 0.00000000084 | 0.29  | Testis       |
|      |      | <i>MMP1</i>   | 0.0000000064  | 0.31  | Cells - Tran |
|      |      | <i>MMP1</i>   | 0.000013      | 0.31  | Heart - Left |
| 0.98 | 0.99 | <i>WTAPP1</i> | 0.00000000084 | 0.29  | Testis       |
|      |      | <i>MMP1</i>   | 0.0000000036  | 0.31  | Cells - Tran |
|      |      | <i>MMP1</i>   | 0.000018      | 0.31  | Heart - Left |
| 1    | 1    | <i>WTAPP1</i> | 0.0000000039  | 0.28  | Testis       |
|      |      | <i>MMP1</i>   | 0.000000005   | 0.31  | Cells - Tran |
|      |      | <i>MMP1</i>   | 0.000023      | 0.3   | Heart - Left |
| 1    | 1    | <i>MMP1</i>   | 0.0000000055  | 0.31  | Cells - Tran |
|      |      | <i>WTAPP1</i> | 0.000000017   | 0.27  | Testis       |
|      |      | <i>MMP1</i>   | 0.000033      | 0.3   | Heart - Left |
| 1    | 1    | <i>WTAPP1</i> | 0.0000000045  | 0.28  | Testis       |
|      |      | <i>MMP1</i>   | 0.0000000047  | 0.31  | Cells - Tran |
|      |      | <i>MMP1</i>   | 0.000023      | 0.3   | Heart - Left |
| 1    | 1    | <i>MMP1</i>   | 0.0000000047  | 0.32  | Cells - Tran |
|      |      | <i>WTAPP1</i> | 0.0000000054  | 0.28  | Testis       |
|      |      | <i>MMP1</i>   | 0.000022      | 0.3   | Heart - Left |
| 0.99 | 0.99 | <i>WTAPP1</i> | 0.0000000045  | 0.28  | Testis       |
|      |      | <i>MMP1</i>   | 0.0000000049  | 0.31  | Cells - Tran |
|      |      | <i>MMP1</i>   | 0.000023      | 0.3   | Heart - Left |
| 0.99 | 0.99 | <i>MMP1</i>   | 0.000000005   | 0.31  | Cells - Tran |
|      |      | <i>WTAPP1</i> | 0.0000000054  | 0.28  | Testis       |
|      |      | <i>MMP1</i>   | 0.000023      | 0.3   | Heart - Left |
| 0.99 | 0.99 | <i>MMP1</i>   | 0.0000000048  | 0.31  | Cells - Tran |



|      |      |                      |                      |       |              |
|------|------|----------------------|----------------------|-------|--------------|
|      |      | <i>WTAPP1</i>        | 0.0000000054         | 0.28  | Testis       |
|      |      | <i>MMP1</i>          | 0.000023             | 0.3   | Heart - Left |
| 0.99 | 1    | <i>RP11-212I21.2</i> | 0.000061             | 0.27  | Artery - Ao  |
| 0.95 | 0.98 | <i>SLC12A5</i>       | 0.000034             | 0.38  | Skin - Sun E |
|      |      | <i>PLTP</i>          | 0.000031             | -0.24 | Nerve - Tib  |
|      |      | <i>SLC12A5</i>       | 0.000022             | 0.46  | Skin - Not S |
|      |      | <i>SLC12A5</i>       | 0.00001              | 0.4   | Nerve - Tib  |
|      |      | <i>SLC12A5</i>       | 0.0000026            | 0.46  | Thyroid      |
|      |      | <i>SLC12A5</i>       | 0.0000006            | 0.21  | Muscle - Sk  |
|      |      | <i>SLC12A5</i>       | 0.00000046           | 0.74  | Spleen       |
|      |      | <i>SNX21</i>         | 0.00000033           | 0.66  | Breast - Ma  |
|      |      | <i>SLC12A5</i>       | 0.00000015           | 0.63  | Artery - Ao  |
|      |      | <i>SLC12A5</i>       | 0.00000012           | -0.62 | Adrenal Gl   |
|      |      | <i>SLC12A5</i>       | 0.0000000053         | 0.54  | Adipose - S  |
|      |      | <i>SLC12A5</i>       | 0.00000000000022     | 0.75  | Adipose - V  |
|      |      | <i>SLC12A5</i>       | 0.0000000000000019   | 0.58  | Lung         |
| 0.95 | 0.98 | <i>SLC12A5</i>       | 0.000034             | 0.38  | Skin - Sun E |
|      |      | <i>PLTP</i>          | 0.000031             | -0.24 | Nerve - Tib  |
|      |      | <i>SLC12A5</i>       | 0.000028             | 0.46  | Skin - Not S |
|      |      | <i>SLC12A5</i>       | 0.00001              | 0.4   | Nerve - Tib  |
|      |      | <i>SLC12A5</i>       | 0.000007             | 0.44  | Thyroid      |
|      |      | <i>SNX21</i>         | 0.00000025           | 0.77  | Spleen       |
|      |      | <i>SLC12A5</i>       | 0.00000023           | 0.67  | Breast - Ma  |
|      |      | <i>SLC12A5</i>       | 0.00000015           | 0.63  | Artery - Ao  |
|      |      | <i>SLC12A5</i>       | 0.000000098          | -0.63 | Adrenal Gl   |
|      |      | <i>SLC12A5</i>       | 0.0000000053         | 0.54  | Adipose - S  |
|      |      | <i>SLC12A5</i>       | 0.00000000000022     | 0.75  | Adipose - V  |
|      |      | <i>SLC12A5</i>       | 0.0000000000000019   | 0.58  | Lung         |
| 0.86 | 0.98 | <i>SLC12A5</i>       | 0.0000000000000033   | 0.8   | Adipose - V  |
|      |      | <i>SLC12A5</i>       | 0.000000000000026    | 0.54  | Lung         |
|      |      | <i>SLC12A5</i>       | 0.00000004           | 0.84  | Spleen       |
|      |      | <i>SLC12A5</i>       | 0.00000012           | 0.51  | Adipose - S  |
|      |      | <i>SLC12A5</i>       | 0.00000026           | 0.64  | Artery - Ao  |
|      |      | <i>SNX21</i>         | 0.00000039           | 0.23  | Muscle - Sk  |
|      |      | <i>SLC12A5</i>       | 0.0000046            | -0.57 | Adrenal Gl   |
|      |      | <i>SLC12A5</i>       | 0.000014             | 0.41  | Nerve - Tib  |
|      |      | <i>PLTP</i>          | 0.000018             | -0.26 | Nerve - Tib  |
|      |      | <i>PLTP</i>          | 0.000019             | -0.28 | Lung         |
|      |      | <i>SLC12A5</i>       | 0.000021             | 0.59  | Breast - Ma  |
|      |      | <i>SLC12A5</i>       | 0.000025             | 0.4   | Skin - Sun E |
|      |      | <i>SLC12A5</i>       | 0.000028             | 0.42  | Thyroid      |
|      |      | <i>SLC12A5</i>       | 0.000036             | 0.47  | Skin - Not S |
|      |      | <i>WFDC3</i>         | 0.000058             | -0.4  | Nerve - Tib  |
| 1    | 1    | <i>SLC12A5</i>       | 0.000000000000000059 | 0.61  | Lung         |

|      |   |                |                      |          |              |
|------|---|----------------|----------------------|----------|--------------|
|      |   | <i>SLC12A5</i> | 0.0000000000000016   | 0.8      | Adipose - V  |
|      |   | <i>SLC12A5</i> | 0.000000000002       | 0.61     | Adipose - S  |
|      |   | <i>SLC12A5</i> | 0.000000045          | 0.69     | Breast - M   |
|      |   | <i>SLC12A5</i> | 0.000000082          | 0.63     | Artery - Ao  |
|      |   | <i>SLC12A5</i> | 0.00000018           | 0.78     | Spleen       |
|      |   | <i>SNX21</i>   | 0.00000098           | 0.21     | Muscle - Sk  |
|      |   | <i>SLC12A5</i> | 0.0000023            | -0.56    | Adrenal Gl   |
|      |   | <i>SLC12A5</i> | 0.0000024            | 0.43     | Nerve - Tib  |
|      |   | <i>SLC12A5</i> | 0.0000024            | 0.45     | Thyroid      |
|      |   | <i>SLC12A5</i> | 0.0000035            | 43466.00 | Uterus       |
|      |   | <i>SLC12A5</i> | 0.0000054            | 0.41     | Skin - Sun E |
|      |   | <i>SLC12A5</i> | 0.00001              | 0.48     | Skin - Not S |
|      |   | <i>PLTP</i>    | 0.000056             | -0.24    | Nerve - Tib  |
| 0.99 | 1 | <i>SLC12A5</i> | 8.9E-22              | 0.66     | Lung         |
|      |   | <i>SLC12A5</i> | 0.0000000000000002   | 0.81     | Adipose - V  |
|      |   | <i>SLC12A5</i> | 0.000000000000003    | 0.68     | Adipose - S  |
|      |   | <i>SLC12A5</i> | 0.000000000011       | 0.77     | Breast - M   |
|      |   | <i>SLC12A5</i> | 0.000000000015       | 0.88     | Spleen       |
|      |   | <i>SLC12A5</i> | 0.000000023          | 0.67     | Artery - Ao  |
|      |   | <i>SLC12A5</i> | 0.00000014           | 0.49     | Thyroid      |
|      |   | <i>SLC12A5</i> | 0.00000038           | 43466.00 | Uterus       |
|      |   | <i>SLC12A5</i> | 0.0000029            | 0.44     | Nerve - Tib  |
|      |   | <i>SNX21</i>   | 0.0000032            | 0.2      | Muscle - Sk  |
|      |   | <i>SLC12A5</i> | 0.0000058            | 0.41     | Skin - Sun E |
|      |   | <i>SLC12A5</i> | 0.000014             | 0.66     | Artery - Co  |
|      |   | <i>SLC12A5</i> | 0.000031             | 0.44     | Skin - Not S |
| 0.99 | 1 | <i>SLC12A5</i> | 0.000000000000000005 | 0.63     | Lung         |
|      |   | <i>SLC12A5</i> | 0.00000000000000034  | 0.79     | Adipose - V  |
|      |   | <i>SLC12A5</i> | 0.00000000000083     | 0.62     | Adipose - S  |
|      |   | <i>SLC12A5</i> | 0.000000012          | 0.71     | Breast - M   |
|      |   | <i>SLC12A5</i> | 0.000000055          | 0.78     | Spleen       |
|      |   | <i>SLC12A5</i> | 0.00000006           | 0.65     | Artery - Ao  |
|      |   | <i>SLC12A5</i> | 0.00000095           | 0.45     | Skin - Sun E |
|      |   | <i>SLC12A5</i> | 0.0000015            | 0.46     | Nerve - Tib  |
|      |   | <i>SLC12A5</i> | 0.0000016            | 0.46     | Thyroid      |
|      |   | <i>SLC12A5</i> | 0.000002             | 0.51     | Skin - Not S |
|      |   | <i>SLC12A5</i> | 0.0000021            | -0.57    | Adrenal Gl   |
|      |   | <i>SLC12A5</i> | 0.0000038            | 43466.00 | Uterus       |
|      |   | <i>SNX21</i>   | 0.0000049            | 0.2      | Muscle - Sk  |
| 0.98 | 1 | <i>SLC12A5</i> | 8.9E-22              | 0.66     | Lung         |
|      |   | <i>SLC12A5</i> | 0.000000000000000086 | 0.82     | Adipose - V  |
|      |   | <i>SLC12A5</i> | 0.00000000000000019  | 0.71     | Adipose - S  |
|      |   | <i>SLC12A5</i> | 0.0000000000032      | 0.79     | Breast - M   |
|      |   | <i>SLC12A5</i> | 0.0000000000046      | 0.89     | Spleen       |
|      |   | <i>SLC12A5</i> | 0.000000033          | 0.66     | Artery - Ao  |
|      |   | <i>SLC12A5</i> | 0.00000029           | 0.48     | Thyroid      |
|      |   | <i>SLC12A5</i> | 0.00000038           | 43466.00 | Uterus       |

|      |      |         |                      |          |              |
|------|------|---------|----------------------|----------|--------------|
| 0.98 | 1    | SLC12A5 | 0.00000053           | 0.47     | Nerve - Tib  |
|      |      | SLC12A5 | 0.0000011            | 0.44     | Skin - Sun E |
|      |      | SNX21   | 0.0000065            | 0.19     | Muscle - Sk  |
|      |      | SLC12A5 | 0.000014             | 0.66     | Artery - Co  |
|      |      | SLC12A5 | 0.000031             | 0.44     | Skin - Not S |
|      |      | SLC12A5 | 7.5E-22              | 0.65     | Lung         |
|      |      | SLC12A5 | 0.000000000000000087 | 0.81     | Adipose - V  |
|      |      | SLC12A5 | 0.0000000000000001   | 0.71     | Adipose - S  |
|      |      | SLC12A5 | 0.0000000000032      | 0.79     | Breast - M   |
|      |      | SLC12A5 | 0.00000000004        | 0.87     | Spleen       |
|      |      | SLC12A5 | 0.000000033          | 0.66     | Artery - Ao  |
|      |      | SLC12A5 | 0.00000029           | 0.48     | Thyroid      |
|      |      | SLC12A5 | 0.00000038           | 43466.00 | Uterus       |
|      |      | SLC12A5 | 0.00000053           | 0.47     | Nerve - Tib  |
|      |      | SLC12A5 | 0.0000012            | 0.43     | Skin - Sun E |
| 0.98 | 1    | SNX21   | 0.0000028            | 0.2      | Muscle - Sk  |
|      |      | SLC12A5 | 0.000014             | 0.66     | Artery - Co  |
|      |      | SLC12A5 | 0.000031             | 0.44     | Skin - Not S |
|      |      | SLC12A5 | 3E-21                | 0.66     | Lung         |
|      |      | SLC12A5 | 0.00000000000000004  | 0.8      | Adipose - V  |
|      |      | SLC12A5 | 0.0000000000000007   | 0.69     | Adipose - S  |
|      |      | SLC12A5 | 0.0000000000099      | 0.88     | Spleen       |
|      |      | SLC12A5 | 0.000000000036       | 0.76     | Breast - M   |
|      |      | SLC12A5 | 0.0000002            | 0.49     | Thyroid      |
|      |      | SLC12A5 | 0.00000021           | 0.62     | Artery - Ao  |
|      |      | SLC12A5 | 0.00000024           | 0.48     | Nerve - Tib  |
|      |      | SLC12A5 | 0.00000026           | 43466.00 | Uterus       |
|      |      | SLC12A5 | 0.00000034           | 0.46     | Skin - Sun E |
|      |      | SLC12A5 | 0.0000046            | 0.49     | Skin - Not S |
|      |      | SLC12A5 | 0.0000056            | 0.7      | Artery - Co  |
| 0.96 | 1    | SNX21   | 0.000013             | 0.18     | Muscle - Sk  |
|      |      | SLC12A5 | 0.000019             | -0.51    | Adrenal Gl   |
|      |      | SLC12A5 | 1.7E-21              | 0.65     | Lung         |
|      |      | SLC12A5 | 0.000000000000000016 | 0.81     | Adipose - V  |
|      |      | SLC12A5 | 0.00000000000000025  | 0.7      | Adipose - S  |
|      |      | SLC12A5 | 0.00000000004        | 0.87     | Spleen       |
|      |      | SLC12A5 | 0.0000000000069      | 0.79     | Breast - M   |
|      |      | SLC12A5 | 0.000000056          | 0.65     | Artery - Ao  |
|      |      | SLC12A5 | 0.00000017           | 0.5      | Thyroid      |
|      |      | SLC12A5 | 0.00000038           | 43466.00 | Uterus       |
|      |      | SLC12A5 | 0.00000055           | 0.47     | Nerve - Tib  |
|      |      | SLC12A5 | 0.0000013            | 0.43     | Skin - Sun E |
|      |      | SNX21   | 0.000003             | 0.2      | Muscle - Sk  |
|      |      | SLC12A5 | 0.000014             | 0.66     | Artery - Co  |
| 0.93 | 0.97 | SLC12A5 | 2.1E-21              | 0.66     | Lung         |
|      |      | SLC12A5 | 0.000000000000000035 | 0.81     | Adipose - V  |
|      |      | SLC12A5 | 0.000000000000000039 | 0.7      | Adipose - S  |

|      |      |                     |                     |          |              |
|------|------|---------------------|---------------------|----------|--------------|
|      |      | <i>SLC12A5</i>      | 0.00000000042       | 0.76     | Breast - Ma  |
|      |      | <i>SLC12A5</i>      | 0.00000000078       | 0.87     | Spleen       |
|      |      | <i>SLC12A5</i>      | 0.000000015         | 0.67     | Artery - Ao  |
|      |      | <i>SLC12A5</i>      | 0.000000095         | 0.5      | Thyroid      |
|      |      | <i>SLC12A5</i>      | 0.00000061          | 0.47     | Nerve - Tib  |
|      |      | <i>SLC12A5</i>      | 0.0000016           | 0.43     | Skin - Sun E |
|      |      | <i>SLC12A5</i>      | 0.0000024           | 1.00     | Uterus       |
|      |      | <i>SNX21</i>        | 0.0000031           | 0.2      | Muscle - Sk  |
|      |      | <i>PLTP</i>         | 0.000017            | -0.43    | Pituitary    |
| 0.82 | 1    | <i>SLC12A5</i>      | 0.000000000018      | 0.45     | Lung         |
|      |      | <i>SLC12A5</i>      | 0.000000000023      | 0.62     | Adipose - V  |
|      |      | <i>SLC12A5</i>      | 0.00000000036       | 0.51     | Adipose - S  |
|      |      | <i>SLC12A5</i>      | 0.00000028          | 0.53     | Breast - Ma  |
|      |      | <i>SLC12A5</i>      | 0.000003            | 0.61     | Spleen       |
|      |      | <i>RPL13P2</i>      | 0.000013            | -0.47    | Testis       |
| 0.89 | 0.98 | <i>SLC12A5</i>      | 8.9E-22             | 0.66     | Lung         |
|      |      | <i>SLC12A5</i>      | 0.00000000000000086 | 0.82     | Adipose - V  |
|      |      | <i>SLC12A5</i>      | 0.0000000000000019  | 0.71     | Adipose - S  |
|      |      | <i>SLC12A5</i>      | 0.000000000032      | 0.79     | Breast - Ma  |
|      |      | <i>SLC12A5</i>      | 0.000000000046      | 0.89     | Spleen       |
|      |      | <i>SLC12A5</i>      | 0.000000033         | 0.66     | Artery - Ao  |
|      |      | <i>SLC12A5</i>      | 0.00000029          | 0.48     | Thyroid      |
|      |      | <i>SLC12A5</i>      | 0.00000038          | 43466.00 | Uterus       |
|      |      | <i>SLC12A5</i>      | 0.00000053          | 0.47     | Nerve - Tib  |
|      |      | <i>SLC12A5</i>      | 0.0000011           | 0.44     | Skin - Sun E |
|      |      | <i>SNX21</i>        | 0.0000065           | 0.19     | Muscle - Sk  |
|      |      | <i>SLC12A5</i>      | 0.000014            | 0.66     | Artery - Co  |
|      |      | <i>SLC12A5</i>      | 0.000031            | 0.44     | Skin - Not S |
| 0.83 | 0.94 | <i>SLC12A5</i>      | 0.00000000085       | -0.48    | Adrenal Gl   |
|      |      | <i>NEURL2</i>       | 0.0000000018        | -0.28    | Adipose - S  |
|      |      | <i>NEURL2</i>       | 0.000000097         | -0.3     | Adipose - V  |
|      |      | <i>ZSWIM1</i>       | 0.00000023          | -0.28    | Adipose - V  |
|      |      | <i>PLTP</i>         | 0.00000072          | -0.19    | Lung         |
|      |      | <i>RP3-337O18.9</i> | 0.00000072          | -0.22    | Adipose - S  |
|      |      | <i>PLTP</i>         | 0.000001            | -0.18    | Artery - Tib |
|      |      | <i>PLTP</i>         | 0.0000015           | -0.2     | Nerve - Tib  |
|      |      | <i>PLTP</i>         | 0.0000023           | -0.25    | Heart - Left |
|      |      | <i>PCIF1</i>        | 0.0000051           | 0.32     | Adrenal Gl   |
|      |      | <i>SPATA25</i>      | 0.0000078           | -0.28    | Adipose - V  |
|      |      | <i>PLTP</i>         | 0.0000079           | -0.27    | Colon - Sigi |
|      |      | <i>WFDC3</i>        | 0.0000087           | -0.25    | Artery - Tib |
|      |      | <i>PLTP</i>         | 0.0000095           | -0.17    | Thyroid      |
|      |      | <i>CD40</i>         | 0.000011            | 0.25     | Adipose - V  |
|      |      | <i>PLTP</i>         | 0.000012            | -0.16    | Adipose - S  |
|      |      | <i>PLTP</i>         | 0.000013            | -0.16    | Adipose - V  |
|      |      | <i>SNX21</i>        | 0.000029            | 0.13     | Muscle - Sk  |

|      |      |                     |                 |       |              |
|------|------|---------------------|-----------------|-------|--------------|
| 0.94 | 0.99 | <i>ZNF335</i>       | 0.000033        | 0.1   | Whole Blo    |
|      |      | <i>MMP9</i>         | 0.000045        | -0.2  | Cells - Tran |
|      |      | <i>SLC12A5</i>      | 0.0000000000045 | -0.53 | Adrenal Gl   |
|      |      | <i>PLTP</i>         | 0.000000026     | -0.23 | Lung         |
|      |      | <i>PLTP</i>         | 0.000000038     | -0.23 | Nerve - Tib  |
|      |      | <i>PLTP</i>         | 0.00000025      | -0.19 | Artery - Tib |
|      |      | <i>NEURL2</i>       | 0.00000069      | -0.24 | Adipose - S  |
|      |      | <i>PCIF1</i>        | 0.00000087      | 0.35  | Adrenal Gl   |
|      |      | <i>NEURL2</i>       | 0.0000019       | -0.27 | Adipose - V  |
|      |      | <i>PLTP</i>         | 0.0000025       | -0.27 | Heart - Left |
|      |      | <i>SNX21</i>        | 0.0000027       | 0.15  | Muscle - Sk  |
|      |      | <i>PLTP</i>         | 0.0000048       | -0.25 | Brain - Hipp |
|      |      | <i>WFDC3</i>        | 0.0000083       | -0.25 | Artery - Tib |
|      |      | <i>PLTP</i>         | 0.0000083       | -0.31 | Adrenal Gl   |
|      |      | <i>PLTP</i>         | 0.000012        | -0.17 | Thyroid      |
|      |      | <i>PLTP</i>         | 0.000014        | -0.23 | Artery - Ao  |
|      |      | <i>WFDC10B</i>      | 0.000014        | 0.39  | Testis       |
|      |      | <i>PLTP</i>         | 0.000016        | -0.16 | Adipose - S  |
|      |      | <i>RP3-337O18.9</i> | 0.000021        | -0.2  | Adipose - S  |
|      |      | <i>ZSWIM1</i>       | 0.000025        | -0.24 | Adipose - V  |
|      |      | <i>WFDC3</i>        | 0.00003         | -0.32 | Testis       |
|      |      | <i>NEURL2</i>       | 0.000032        | -0.22 | Thyroid      |
|      |      | <i>ZNF335</i>       | 0.000033        | 0.1   | Whole Blo    |
|      |      | <i>WFDC3</i>        | 0.000054        | -0.25 | Adipose - S  |
| 0.94 | 0.99 | <i>SLC12A5</i>      | 0.0000000000031 | -0.51 | Adrenal Gl   |
|      |      | <i>NEURL2</i>       | 0.000000013     | -0.32 | Adipose - V  |
|      |      | <i>NEURL2</i>       | 0.000000052     | -0.26 | Adipose - S  |
|      |      | <i>ZSWIM1</i>       | 0.00000019      | -0.29 | Adipose - V  |
|      |      | <i>PLTP</i>         | 0.0000004       | -0.21 | Nerve - Tib  |
|      |      | <i>PCIF1</i>        | 0.00000079      | 0.34  | Adrenal Gl   |
|      |      | <i>PLTP</i>         | 0.00000089      | -0.2  | Lung         |
|      |      | <i>PLTP</i>         | 0.0000014       | -0.18 | Artery - Tib |
|      |      | <i>RP3-337O18.9</i> | 0.0000016       | -0.22 | Adipose - S  |
|      |      | <i>SNX21</i>        | 0.0000016       | 0.15  | Muscle - Sk  |
|      |      | <i>PLTP</i>         | 0.0000038       | -0.17 | Adipose - V  |
|      |      | <i>CD40</i>         | 0.0000038       | 0.27  | Adipose - V  |
|      |      | <i>PLTP</i>         | 0.0000096       | -0.24 | Brain - Hipp |
|      |      | <i>PLTP</i>         | 0.00001         | -0.24 | Heart - Left |
|      |      | <i>PLTP</i>         | 0.000012        | -0.27 | Colon - Sigi |
|      |      | <i>SPATA25</i>      | 0.000013        | -0.28 | Adipose - V  |
|      |      | <i>PLTP</i>         | 0.000014        | -0.16 | Adipose - S  |
|      |      | <i>RP3-337O18.9</i> | 0.000019        | -0.24 | Adipose - V  |
|      |      | <i>ZNF335</i>       | 0.000034        | 0.1   | Whole Blo    |
|      |      | <i>WFDC3</i>        | 0.000036        | -0.23 | Artery - Tib |
|      |      | <i>WFDC10B</i>      | 0.00004         | 0.36  | Testis       |
|      |      | <i>MMP9</i>         | 0.000045        | -0.21 | Cells - Tran |
|      |      | <i>PLTP</i>         | 0.000063        | -0.16 | Thyroid      |

|      |      |                     |               |       |              |
|------|------|---------------------|---------------|-------|--------------|
| 0.9  | 0.96 | <i>SLC12A5</i>      | 0.00000000031 | -0.49 | Adrenal Gl   |
|      |      | <i>NEURL2</i>       | 0.000000018   | -0.32 | Adipose - V  |
|      |      | <i>NEURL2</i>       | 0.000000012   | -0.26 | Adipose - S  |
|      |      | <i>ZSWIM1</i>       | 0.000000038   | -0.29 | Adipose - V  |
|      |      | <i>RP3-337O18.9</i> | 0.000000049   | -0.23 | Adipose - S  |
|      |      | <i>PLTP</i>         | 0.000000064   | -0.21 | Nerve - Tib  |
|      |      | <i>PLTP</i>         | 0.00000013    | -0.19 | Lung         |
|      |      | <i>PCIF1</i>        | 0.00000014    | 0.34  | Adrenal Gl   |
|      |      | <i>SNX21</i>        | 0.00000017    | 0.15  | Muscle - Sk  |
|      |      | <i>PLTP</i>         | 0.00000023    | -0.17 | Artery - Tib |
|      |      | <i>PLTP</i>         | 0.00000043    | -0.17 | Adipose - S  |
|      |      | <i>PLTP</i>         | 0.00000053    | -0.17 | Adipose - V  |
|      |      | <i>PLTP</i>         | 0.00000063    | -0.28 | Colon - Sigi |
|      |      | <i>WFDC3</i>        | 0.00000066    | -0.26 | Artery - Tib |
|      |      | <i>SPATA25</i>      | 0.00000077    | -0.29 | Adipose - V  |
|      |      | <i>PLTP</i>         | 0.00000079    | -0.32 | Pituitary    |
|      |      | <i>CD40</i>         | 0.00000022    | 0.25  | Adipose - V  |
|      |      | <i>WFDC10B</i>      | 0.00000031    | 0.37  | Testis       |
|      |      | <i>NEURL2</i>       | 0.00000033    | -0.27 | Artery - Ao  |
|      |      | <i>RP3-337O18.9</i> | 0.00000034    | -0.23 | Adipose - V  |
|      |      | <i>PLTP</i>         | 0.00000035    | -0.16 | Thyroid      |
|      |      | <i>WFDC3</i>        | 0.00000037    | -0.31 | Testis       |
|      |      | <i>MMP9</i>         | 0.00000042    | -0.21 | Cells - Tran |
| 0.85 | 0.99 | <i>SLC12A5</i>      | 0.00000000032 | -0.48 | Adrenal Gl   |
|      |      | <i>NEURL2</i>       | 0.000000016   | -0.27 | Adipose - S  |
|      |      | <i>PLTP</i>         | 0.000000026   | -0.2  | Lung         |
|      |      | <i>ZSWIM1</i>       | 0.000000031   | -0.28 | Adipose - V  |
|      |      | <i>NEURL2</i>       | 0.000000054   | -0.28 | Adipose - V  |
|      |      | <i>PLTP</i>         | 0.000000075   | -0.18 | Artery - Tib |
|      |      | <i>PLTP</i>         | 0.000000083   | -0.27 | Heart - Left |
|      |      | <i>RP3-337O18.9</i> | 0.00000014    | -0.22 | Adipose - S  |
|      |      | <i>PLTP</i>         | 0.00000021    | -0.2  | Nerve - Tib  |
|      |      | <i>SPATA25</i>      | 0.00000036    | -0.29 | Adipose - V  |
|      |      | <i>PLTP</i>         | 0.00000037    | -0.28 | Colon - Sigi |
|      |      | <i>PLTP</i>         | 0.00000038    | -0.18 | Thyroid      |
|      |      | <i>PCIF1</i>        | 0.00000094    | 0.31  | Adrenal Gl   |
|      |      | <i>CD40</i>         | 0.00000013    | 0.25  | Adipose - V  |
|      |      | <i>PLTP</i>         | 0.00000013    | -0.16 | Adipose - S  |
|      |      | <i>PLTP</i>         | 0.00000015    | -0.15 | Adipose - V  |
|      |      | <i>PLTP</i>         | 0.00000002    | -0.29 | Pituitary    |
|      |      | <i>SNX21</i>        | 0.00000024    | 0.13  | Muscle - Sk  |
|      |      | <i>WFDC10B</i>      | 0.00000025    | 0.36  | Testis       |
|      |      | <i>MMP9</i>         | 0.00000003    | -0.21 | Cells - Tran |
|      |      | <i>WFDC3</i>        | 0.00000031    | -0.23 | Artery - Tib |
| 0.95 | 0.99 | <i>SLC12A5</i>      | 0.00000000004 | -0.52 | Adrenal Gl   |
|      |      | <i>PLTP</i>         | 0.000000001   | -0.24 | Lung         |
|      |      | <i>PLTP</i>         | 0.000000061   | -0.23 | Nerve - Tib  |

|      |      |                     |                  |       |              |
|------|------|---------------------|------------------|-------|--------------|
|      |      | <i>PLTP</i>         | 0.00000032       | -0.19 | Artery - Tib |
|      |      | <i>PCIF1</i>        | 0.00000099       | 0.35  | Adrenal Gl   |
|      |      | <i>NEURL2</i>       | 0.0000014        | -0.28 | Adipose - V  |
|      |      | <i>PLTP</i>         | 0.0000025        | -0.27 | Heart - Left |
|      |      | <i>NEURL2</i>       | 0.0000026        | -0.23 | Adipose - S  |
|      |      | <i>SNX21</i>        | 0.0000034        | 0.15  | Muscle - Sk  |
|      |      | <i>PLTP</i>         | 0.0000035        | -0.22 | Brain - Fror |
|      |      | <i>PLTP</i>         | 0.0000046        | -0.17 | Adipose - S  |
|      |      | <i>PLTP</i>         | 0.0000064        | -0.25 | Brain - Hip  |
|      |      | <i>WFDC3</i>        | 0.0000064        | -0.26 | Artery - Tib |
|      |      | <i>PLTP</i>         | 0.000012         | -0.17 | Thyroid      |
|      |      | <i>PLTP</i>         | 0.000014         | -0.23 | Artery - Ao  |
|      |      | <i>WFDC10B</i>      | 0.000014         | 0.39  | Testis       |
|      |      | <i>PLTP</i>         | 0.000019         | -0.3  | Adrenal Gl   |
|      |      | <i>ZSWIM1</i>       | 0.000022         | -0.24 | Adipose - V  |
|      |      | <i>PLTP</i>         | 0.000026         | -0.16 | Adipose - V  |
|      |      | <i>NEURL2</i>       | 0.000029         | -0.22 | Thyroid      |
|      |      | <i>WFDC3</i>        | 0.00003          | -0.32 | Testis       |
|      |      | <i>RP3-337O18.9</i> | 0.000033         | -0.2  | Adipose - S  |
|      |      | <i>NEURL2</i>       | 0.000043         | -0.21 | Lung         |
| 0.99 | 0.99 | <i>SLC12A5</i>      | 0.00000000000061 | -0.57 | Adrenal Gl   |
|      |      | <i>PLTP</i>         | 0.00000000013    | -0.26 | Lung         |
|      |      | <i>PLTP</i>         | 0.000000048      | -0.24 | Nerve - Tib  |
|      |      | <i>PLTP</i>         | 0.00000028       | -0.29 | Heart - Left |
|      |      | <i>PLTP</i>         | 0.0000003        | -0.19 | Adipose - S  |
|      |      | <i>PLTP</i>         | 0.00000052       | -0.19 | Artery - Tib |
|      |      | <i>NEURL2</i>       | 0.0000014        | -0.24 | Adipose - S  |
|      |      | <i>PLTP</i>         | 0.0000016        | -0.19 | Thyroid      |
|      |      | <i>PLTP</i>         | 0.0000016        | -0.23 | Brain - Fror |
|      |      | <i>NEURL2</i>       | 0.0000019        | -0.28 | Adipose - V  |
|      |      | <i>PLTP</i>         | 0.000002         | -0.25 | Artery - Ao  |
|      |      | <i>PLTP</i>         | 0.0000032        | -0.26 | Brain - Hip  |
|      |      | <i>NEURL2</i>       | 0.0000046        | -0.24 | Lung         |
|      |      | <i>PLTP</i>         | 0.0000047        | -0.29 | Colon - Sig  |
|      |      | <i>PCIF1</i>        | 0.0000073        | 0.33  | Adrenal Gl   |
|      |      | <i>NEURL2</i>       | 0.0000092        | -0.29 | Artery - Ao  |
|      |      | <i>RP3-337O18.9</i> | 0.0000099        | -0.21 | Lung         |
|      |      | <i>PLTP</i>         | 0.000013         | -0.31 | Adrenal Gl   |
|      |      | <i>ZSWIM1</i>       | 0.000017         | -0.25 | Adipose - V  |
|      |      | <i>SNX21</i>        | 0.00002          | 0.13  | Muscle - Sk  |
|      |      | <i>PLTP</i>         | 0.000021         | -0.16 | Adipose - V  |
|      |      | <i>NEURL2</i>       | 0.000022         | -0.23 | Thyroid      |
|      |      | <i>ZNF335</i>       | 0.000025         | 0.1   | Whole Bloc   |
|      |      | <i>RP3-337O18.9</i> | 0.000027         | -0.2  | Adipose - S  |
| 0.99 | 0.99 | <i>SLC12A5</i>      | 0.00000000000061 | -0.57 | Adrenal Gl   |
|      |      | <i>PLTP</i>         | 0.00000000013    | -0.26 | Lung         |
|      |      | <i>PLTP</i>         | 0.000000048      | -0.24 | Nerve - Tib  |

|      |      |                     |                |       |              |
|------|------|---------------------|----------------|-------|--------------|
|      |      | <i>PLTP</i>         | 0.00000028     | -0.29 | Heart - Left |
|      |      | <i>PLTP</i>         | 0.0000003      | -0.19 | Adipose - S  |
|      |      | <i>PLTP</i>         | 0.00000052     | -0.19 | Artery - Tib |
|      |      | <i>NEURL2</i>       | 0.0000014      | -0.24 | Adipose - S  |
|      |      | <i>PLTP</i>         | 0.0000016      | -0.19 | Thyroid      |
|      |      | <i>PLTP</i>         | 0.0000016      | -0.23 | Brain - Fror |
|      |      | <i>NEURL2</i>       | 0.0000019      | -0.28 | Adipose - V  |
|      |      | <i>PLTP</i>         | 0.000002       | -0.25 | Artery - Ao  |
|      |      | <i>PLTP</i>         | 0.0000032      | -0.26 | Brain - Hip  |
|      |      | <i>NEURL2</i>       | 0.0000046      | -0.24 | Lung         |
|      |      | <i>PLTP</i>         | 0.0000047      | -0.29 | Colon - Sigi |
|      |      | <i>PCIF1</i>        | 0.0000073      | 0.33  | Adrenal Gl   |
|      |      | <i>NEURL2</i>       | 0.0000092      | -0.29 | Artery - Ao  |
|      |      | <i>RP3-337O18.9</i> | 0.0000099      | -0.21 | Lung         |
|      |      | <i>PLTP</i>         | 0.000013       | -0.31 | Adrenal Gl   |
|      |      | <i>ZSWIM1</i>       | 0.000017       | -0.25 | Adipose - V  |
|      |      | <i>SNX21</i>        | 0.00002        | 0.13  | Muscle - Sk  |
|      |      | <i>PLTP</i>         | 0.000021       | -0.16 | Adipose - V  |
|      |      | <i>NEURL2</i>       | 0.000022       | -0.23 | Thyroid      |
|      |      | <i>ZNF335</i>       | 0.000025       | 0.1   | Whole Bloc   |
|      |      | <i>RP3-337O18.9</i> | 0.000027       | -0.2  | Adipose - S  |
| 0.83 | 0.92 | <i>PLTP</i>         | 0.0000000076   | -0.24 | Lung         |
|      |      | <i>SLC12A5</i>      | 0.0000000082   | -0.48 | Adrenal Gl   |
|      |      | <i>PLTP</i>         | 0.00000003     | -0.2  | Artery - Tib |
|      |      | <i>PLTP</i>         | 0.000000057    | -0.23 | Nerve - Tib  |
|      |      | <i>NEURL2</i>       | 0.0000015      | -0.27 | Adipose - V  |
|      |      | <i>PLTP</i>         | 0.0000015      | -0.17 | Adipose - V  |
|      |      | <i>PLTP</i>         | 0.0000018      | -0.26 | Heart - Left |
|      |      | <i>PCIF1</i>        | 0.0000021      | 0.35  | Adrenal Gl   |
|      |      | <i>NEURL2</i>       | 0.0000022      | -0.23 | Adipose - S  |
|      |      | <i>PLTP</i>         | 0.000004       | -0.24 | Artery - Ao  |
|      |      | <i>PLTP</i>         | 0.0000059      | -0.17 | Adipose - S  |
|      |      | <i>PLTP</i>         | 0.0000066      | -0.24 | Brain - Hip  |
|      |      | <i>NEURL2</i>       | 0.00001        | -0.29 | Artery - Ao  |
|      |      | <i>ZSWIM1</i>       | 0.000012       | -0.25 | Adipose - V  |
|      |      | <i>RP3-337O18.9</i> | 0.000012       | -0.21 | Lung         |
|      |      | <i>PLTP</i>         | 0.000019       | -0.27 | Colon - Sigi |
|      |      | <i>PLTP</i>         | 0.00002        | -0.31 | Pituitary    |
|      |      | <i>WFDC3</i>        | 0.000024       | -0.24 | Artery - Tib |
|      |      | <i>NEURL2</i>       | 0.000024       | -0.22 | Lung         |
|      |      | <i>SNX21</i>        | 0.000028       | 0.13  | Muscle - Sk  |
|      |      | <i>RP3-337O18.9</i> | 0.00004        | -0.19 | Adipose - S  |
|      |      | <i>PLTP</i>         | 0.000041       | -0.16 | Thyroid      |
|      |      | <i>NEURL2</i>       | 0.000044       | -0.22 | Thyroid      |
| 0.99 | 0.99 | <i>SLC12A5</i>      | 0.000000000043 | -0.57 | Adrenal Gl   |
|      |      | <i>PLTP</i>         | 0.00000000033  | -0.26 | Lung         |
|      |      | <i>PLTP</i>         | 0.000000026    | -0.32 | Heart - Left |



|      |       |                     |                |       |              |
|------|-------|---------------------|----------------|-------|--------------|
|      |       | <i>PLTP</i>         | 0.000000034    | -0.24 | Nerve - Tib  |
|      |       | <i>PLTP</i>         | 0.00000021     | -0.2  | Adipose - S  |
|      |       | <i>NEURL2</i>       | 0.00000026     | -0.3  | Adipose - V  |
|      |       | <i>PLTP</i>         | 0.00000046     | -0.2  | Thyroid      |
|      |       | <i>PLTP</i>         | 0.00000055     | -0.19 | Artery - Tib |
|      |       | <i>PLTP</i>         | 0.00000066     | -0.37 | Adrenal Gl   |
|      |       | <i>NEURL2</i>       | 0.0000015      | -0.24 | Adipose - S  |
|      |       | <i>PLTP</i>         | 0.000002       | -0.25 | Artery - Ao  |
|      |       | <i>NEURL2</i>       | 0.0000021      | -0.31 | Artery - Ao  |
|      |       | <i>PLTP</i>         | 0.0000024      | -0.18 | Adipose - V  |
|      |       | <i>PLTP</i>         | 0.0000025      | -0.3  | Colon - Sigi |
|      |       | <i>PLTP</i>         | 0.0000033      | -0.22 | Brain - Fror |
|      |       | <i>PCIF1</i>        | 0.0000041      | 0.35  | Adrenal Gl   |
|      |       | <i>ZSWIM1</i>       | 0.0000068      | -0.26 | Adipose - V  |
|      |       | <i>RP3-337O18.9</i> | 0.0000076      | -0.22 | Lung         |
|      |       | <i>PLTP</i>         | 0.0000091      | -0.32 | Pituitary    |
|      |       | <i>SNX21</i>        | 0.000012       | 0.14  | Muscle - Sk  |
|      |       | <i>RP3-337O18.9</i> | 0.000028       | -0.2  | Adipose - S  |
|      |       | <i>NEURL2</i>       | 0.000036       | -0.22 | Lung         |
|      |       | <i>NEURL2</i>       | 0.000073       | -0.22 | Thyroid      |
| 0.82 | -0.98 | <i>SLC12A5</i>      | 0.000000000012 | 0.5   | Adrenal Gl   |
|      |       | <i>PLTP</i>         | 0.000000000041 | 0.28  | Nerve - Tib  |
|      |       | <i>NEURL2</i>       | 0.000000000047 | 0.35  | Adipose - V  |
|      |       | <i>PLTP</i>         | 0.00000000011  | 0.23  | Artery - Tib |
|      |       | <i>PLTP</i>         | 0.0000000028   | 0.24  | Lung         |
|      |       | <i>NEURL2</i>       | 0.000000004    | 0.27  | Adipose - S  |
|      |       | <i>PLTP</i>         | 0.0000000059   | 0.35  | Colon - Sigi |
|      |       | <i>ZSWIM1</i>       | 0.0000000059   | 0.31  | Adipose - V  |
|      |       | <i>PLTP</i>         | 0.000000034    | 0.2   | Adipose - S  |
|      |       | <i>RP3-337O18.9</i> | 0.000000051    | 0.29  | Adipose - V  |
|      |       | <i>RP3-337O18.9</i> | 0.00000013     | 0.24  | Lung         |
|      |       | <i>SPATA25</i>      | 0.00000014     | 0.32  | Adipose - V  |
|      |       | <i>RP3-337O18.9</i> | 0.00000019     | 0.23  | Adipose - S  |
|      |       | <i>PLTP</i>         | 0.00000023     | 0.18  | Adipose - V  |
|      |       | <i>PLTP</i>         | 0.00000091     | 0.25  | Artery - Ao  |
|      |       | <i>SNX21</i>        | 0.000001       | -0.15 | Muscle - Sk  |
|      |       | <i>CD40</i>         | 0.0000017      | -0.27 | Adipose - V  |
|      |       | <i>NEURL2</i>       | 0.0000044      | 0.23  | Lung         |
|      |       | <i>NEURL2</i>       | 0.0000055      | 0.29  | Artery - Ao  |
|      |       | <i>PLTP</i>         | 0.000013       | 0.24  | Stomach      |
|      |       | <i>PCIF1</i>        | 0.000013       | -0.3  | Adrenal Gl   |
|      |       | <i>SNX21</i>        | 0.000022       | 0.17  | Thyroid      |
|      |       | <i>PLTP</i>         | 0.000024       | 0.16  | Thyroid      |
|      |       | <i>CD40</i>         | 0.000047       | -0.19 | Skin - Sun E |
| 0.82 | 0.94  | <i>SLC12A5</i>      | 0.00000000085  | -0.48 | Adrenal Gl   |
|      |       | <i>NEURL2</i>       | 0.0000000018   | -0.28 | Adipose - S  |

|      |      |                     |                 |       |              |
|------|------|---------------------|-----------------|-------|--------------|
|      |      | <i>NEURL2</i>       | 0.000000097     | -0.3  | Adipose - V  |
|      |      | <i>ZSWIM1</i>       | 0.00000023      | -0.28 | Adipose - V  |
|      |      | <i>PLTP</i>         | 0.00000072      | -0.19 | Lung         |
|      |      | <i>RP3-337O18.9</i> | 0.00000072      | -0.22 | Adipose - S  |
|      |      | <i>PLTP</i>         | 0.000001        | -0.18 | Artery - Tib |
|      |      | <i>PLTP</i>         | 0.0000015       | -0.2  | Nerve - Tib  |
|      |      | <i>PLTP</i>         | 0.0000023       | -0.25 | Heart - Left |
|      |      | <i>PCIF1</i>        | 0.0000051       | 0.32  | Adrenal Gl   |
|      |      | <i>SPATA25</i>      | 0.0000078       | -0.28 | Adipose - V  |
|      |      | <i>PLTP</i>         | 0.0000079       | -0.27 | Colon - Sigi |
|      |      | <i>WFDC3</i>        | 0.0000087       | -0.25 | Artery - Tib |
|      |      | <i>PLTP</i>         | 0.0000095       | -0.17 | Thyroid      |
|      |      | <i>CD40</i>         | 0.000011        | 0.25  | Adipose - V  |
|      |      | <i>PLTP</i>         | 0.000012        | -0.16 | Adipose - S  |
|      |      | <i>PLTP</i>         | 0.000013        | -0.16 | Adipose - V  |
|      |      | <i>SNX21</i>        | 0.000029        | 0.13  | Muscle - Sk  |
|      |      | <i>ZNF335</i>       | 0.000033        | 0.1   | Whole Bloc   |
|      |      | <i>MMP9</i>         | 0.000045        | -0.2  | Cells - Tran |
| 0.92 | 0.99 | <i>SLC12A5</i>      | 0.0000000000045 | -0.53 | Adrenal Gl   |
|      |      | <i>PLTP</i>         | 0.000000026     | -0.23 | Lung         |
|      |      | <i>PLTP</i>         | 0.000000038     | -0.23 | Nerve - Tib  |
|      |      | <i>PLTP</i>         | 0.00000025      | -0.19 | Artery - Tib |
|      |      | <i>NEURL2</i>       | 0.00000069      | -0.24 | Adipose - S  |
|      |      | <i>PCIF1</i>        | 0.00000087      | 0.35  | Adrenal Gl   |
|      |      | <i>NEURL2</i>       | 0.0000019       | -0.27 | Adipose - V  |
|      |      | <i>PLTP</i>         | 0.0000025       | -0.27 | Heart - Left |
|      |      | <i>SNX21</i>        | 0.0000027       | 0.15  | Muscle - Sk  |
|      |      | <i>PLTP</i>         | 0.0000048       | -0.25 | Brain - Hip  |
|      |      | <i>WFDC3</i>        | 0.0000083       | -0.25 | Artery - Tib |
|      |      | <i>PLTP</i>         | 0.0000083       | -0.31 | Adrenal Gl   |
|      |      | <i>PLTP</i>         | 0.000012        | -0.17 | Thyroid      |
|      |      | <i>PLTP</i>         | 0.000014        | -0.23 | Artery - Ao  |
|      |      | <i>WFDC10B</i>      | 0.000014        | 0.39  | Testis       |
|      |      | <i>PLTP</i>         | 0.000016        | -0.16 | Adipose - S  |
|      |      | <i>RP3-337O18.9</i> | 0.000021        | -0.2  | Adipose - S  |
|      |      | <i>ZSWIM1</i>       | 0.000025        | -0.24 | Adipose - V  |
|      |      | <i>WFDC3</i>        | 0.00003         | -0.32 | Testis       |
|      |      | <i>NEURL2</i>       | 0.000032        | -0.22 | Thyroid      |
|      |      | <i>ZNF335</i>       | 0.000033        | 0.1   | Whole Bloc   |
|      |      | <i>WFDC3</i>        | 0.000054        | -0.25 | Adipose - S  |
| 0.92 | 0.99 | <i>SLC12A5</i>      | 0.0000000000031 | -0.51 | Adrenal Gl   |
|      |      | <i>NEURL2</i>       | 0.000000013     | -0.32 | Adipose - V  |
|      |      | <i>NEURL2</i>       | 0.000000052     | -0.26 | Adipose - S  |
|      |      | <i>ZSWIM1</i>       | 0.00000019      | -0.29 | Adipose - V  |
|      |      | <i>PLTP</i>         | 0.0000004       | -0.21 | Nerve - Tib  |
|      |      | <i>PCIF1</i>        | 0.00000079      | 0.34  | Adrenal Gl   |
|      |      | <i>PLTP</i>         | 0.00000089      | -0.2  | Lung         |

|      |      |                     |                |       |              |
|------|------|---------------------|----------------|-------|--------------|
|      |      | <i>PLTP</i>         | 0.0000014      | -0.18 | Artery - Tib |
|      |      | <i>RP3-337O18.9</i> | 0.0000016      | -0.22 | Adipose - S  |
|      |      | <i>SNX21</i>        | 0.0000016      | 0.15  | Muscle - Sk  |
|      |      | <i>PLTP</i>         | 0.0000038      | -0.17 | Adipose - V  |
|      |      | <i>CD40</i>         | 0.0000038      | 0.27  | Adipose - V  |
|      |      | <i>PLTP</i>         | 0.0000096      | -0.24 | Brain - Hip  |
|      |      | <i>PLTP</i>         | 0.00001        | -0.24 | Heart - Left |
|      |      | <i>PLTP</i>         | 0.000012       | -0.27 | Colon - Sigi |
|      |      | <i>SPATA25</i>      | 0.000013       | -0.28 | Adipose - V  |
|      |      | <i>PLTP</i>         | 0.000014       | -0.16 | Adipose - S  |
|      |      | <i>RP3-337O18.9</i> | 0.000019       | -0.24 | Adipose - V  |
|      |      | <i>ZNF335</i>       | 0.000034       | 0.1   | Whole Bloc   |
|      |      | <i>WFDC3</i>        | 0.000036       | -0.23 | Artery - Tib |
|      |      | <i>WFDC10B</i>      | 0.00004        | 0.36  | Testis       |
|      |      | <i>MMP9</i>         | 0.000045       | -0.21 | Cells - Tran |
|      |      | <i>PLTP</i>         | 0.000063       | -0.16 | Thyroid      |
| 0.89 | 0.96 | <i>SLC12A5</i>      | 0.000000000031 | -0.51 | Adrenal Gl   |
|      |      | <i>NEURL2</i>       | 0.000000013    | -0.32 | Adipose - V  |
|      |      | <i>NEURL2</i>       | 0.000000052    | -0.26 | Adipose - S  |
|      |      | <i>ZSWIM1</i>       | 0.00000019     | -0.29 | Adipose - V  |
|      |      | <i>PLTP</i>         | 0.0000004      | -0.21 | Nerve - Tib  |
|      |      | <i>PCIF1</i>        | 0.00000079     | 0.34  | Adrenal Gl   |
|      |      | <i>PLTP</i>         | 0.00000089     | -0.2  | Lung         |
|      |      | <i>PLTP</i>         | 0.0000014      | -0.18 | Artery - Tib |
|      |      | <i>RP3-337O18.9</i> | 0.0000016      | -0.22 | Adipose - S  |
|      |      | <i>SNX21</i>        | 0.0000016      | 0.15  | Muscle - Sk  |
|      |      | <i>PLTP</i>         | 0.0000038      | -0.17 | Adipose - V  |
|      |      | <i>CD40</i>         | 0.0000038      | 0.27  | Adipose - V  |
|      |      | <i>PLTP</i>         | 0.0000096      | -0.24 | Brain - Hip  |
|      |      | <i>PLTP</i>         | 0.00001        | -0.24 | Heart - Left |
|      |      | <i>PLTP</i>         | 0.000012       | -0.27 | Colon - Sigi |
|      |      | <i>SPATA25</i>      | 0.000013       | -0.28 | Adipose - V  |
|      |      | <i>PLTP</i>         | 0.000014       | -0.16 | Adipose - S  |
|      |      | <i>RP3-337O18.9</i> | 0.000019       | -0.24 | Adipose - V  |
|      |      | <i>ZNF335</i>       | 0.000034       | 0.1   | Whole Bloc   |
|      |      | <i>WFDC3</i>        | 0.000036       | -0.23 | Artery - Tib |
|      |      | <i>WFDC10B</i>      | 0.00004        | 0.36  | Testis       |
|      |      | <i>MMP9</i>         | 0.000045       | -0.21 | Cells - Tran |
|      |      | <i>PLTP</i>         | 0.000063       | -0.16 | Thyroid      |
| 0.84 | 0.99 | <i>SLC12A5</i>      | 0.000000000032 | -0.48 | Adrenal Gl   |
|      |      | <i>NEURL2</i>       | 0.000000016    | -0.27 | Adipose - S  |
|      |      | <i>PLTP</i>         | 0.00000026     | -0.2  | Lung         |
|      |      | <i>ZSWIM1</i>       | 0.00000031     | -0.28 | Adipose - V  |
|      |      | <i>NEURL2</i>       | 0.00000054     | -0.28 | Adipose - V  |
|      |      | <i>PLTP</i>         | 0.00000075     | -0.18 | Artery - Tib |
|      |      | <i>PLTP</i>         | 0.00000083     | -0.27 | Heart - Left |
|      |      | <i>RP3-337O18.9</i> | 0.0000014      | -0.22 | Adipose - S  |

|      |      |                     |                 |       |              |
|------|------|---------------------|-----------------|-------|--------------|
|      |      | <i>PLTP</i>         | 0.0000021       | -0.2  | Nerve - Tib  |
|      |      | <i>SPATA25</i>      | 0.0000036       | -0.29 | Adipose - V  |
|      |      | <i>PLTP</i>         | 0.0000037       | -0.28 | Colon - Sigi |
|      |      | <i>PLTP</i>         | 0.0000038       | -0.18 | Thyroid      |
|      |      | <i>PCIF1</i>        | 0.0000094       | 0.31  | Adrenal Gl   |
|      |      | <i>CD40</i>         | 0.000013        | 0.25  | Adipose - V  |
|      |      | <i>PLTP</i>         | 0.000013        | -0.16 | Adipose - S  |
|      |      | <i>PLTP</i>         | 0.000015        | -0.15 | Adipose - V  |
|      |      | <i>PLTP</i>         | 0.00002         | -0.29 | Pituitary    |
|      |      | <i>SNX21</i>        | 0.000024        | 0.13  | Muscle - Sk  |
|      |      | <i>WFDC10B</i>      | 0.000025        | 0.36  | Testis       |
|      |      | <i>MMP9</i>         | 0.00003         | -0.21 | Cells - Tran |
|      |      | <i>WFDC3</i>        | 0.000031        | -0.23 | Artery - Tib |
| 0.94 | 0.99 | <i>SLC12A5</i>      | 0.00000000004   | -0.52 | Adrenal Gl   |
|      |      | <i>PLTP</i>         | 0.00000001      | -0.24 | Lung         |
|      |      | <i>PLTP</i>         | 0.000000061     | -0.23 | Nerve - Tib  |
|      |      | <i>PLTP</i>         | 0.00000032      | -0.19 | Artery - Tib |
|      |      | <i>PCIF1</i>        | 0.00000099      | 0.35  | Adrenal Gl   |
|      |      | <i>NEURL2</i>       | 0.0000014       | -0.28 | Adipose - V  |
|      |      | <i>PLTP</i>         | 0.0000025       | -0.27 | Heart - Left |
|      |      | <i>NEURL2</i>       | 0.0000026       | -0.23 | Adipose - S  |
|      |      | <i>SNX21</i>        | 0.0000034       | 0.15  | Muscle - Sk  |
|      |      | <i>PLTP</i>         | 0.0000035       | -0.22 | Brain - Fror |
|      |      | <i>PLTP</i>         | 0.0000046       | -0.17 | Adipose - S  |
|      |      | <i>PLTP</i>         | 0.0000064       | -0.25 | Brain - Hipp |
|      |      | <i>WFDC3</i>        | 0.0000064       | -0.26 | Artery - Tib |
|      |      | <i>PLTP</i>         | 0.000012        | -0.17 | Thyroid      |
|      |      | <i>PLTP</i>         | 0.000014        | -0.23 | Artery - Ao  |
|      |      | <i>WFDC10B</i>      | 0.000014        | 0.39  | Testis       |
|      |      | <i>PLTP</i>         | 0.000019        | -0.3  | Adrenal Gl   |
|      |      | <i>ZSWIM1</i>       | 0.000022        | -0.24 | Adipose - V  |
|      |      | <i>PLTP</i>         | 0.000026        | -0.16 | Adipose - V  |
|      |      | <i>NEURL2</i>       | 0.000029        | -0.22 | Thyroid      |
|      |      | <i>WFDC3</i>        | 0.00003         | -0.32 | Testis       |
|      |      | <i>RP3-337O18.9</i> | 0.000033        | -0.2  | Adipose - S  |
|      |      | <i>NEURL2</i>       | 0.000043        | -0.21 | Lung         |
| 0.99 | 0.98 | <i>SLC12A5</i>      | 0.0000000000061 | -0.57 | Adrenal Gl   |
|      |      | <i>PLTP</i>         | 0.00000000013   | -0.26 | Lung         |
|      |      | <i>PLTP</i>         | 0.000000048     | -0.24 | Nerve - Tib  |
|      |      | <i>PLTP</i>         | 0.00000028      | -0.29 | Heart - Left |
|      |      | <i>PLTP</i>         | 0.0000003       | -0.19 | Adipose - S  |
|      |      | <i>PLTP</i>         | 0.00000052      | -0.19 | Artery - Tib |
|      |      | <i>NEURL2</i>       | 0.0000014       | -0.24 | Adipose - S  |
|      |      | <i>PLTP</i>         | 0.0000016       | -0.19 | Thyroid      |
|      |      | <i>PLTP</i>         | 0.0000016       | -0.23 | Brain - Fror |
|      |      | <i>NEURL2</i>       | 0.0000019       | -0.28 | Adipose - V  |
|      |      | <i>PLTP</i>         | 0.000002        | -0.25 | Artery - Ao  |

|      |      |                     |                  |       |                        |
|------|------|---------------------|------------------|-------|------------------------|
|      |      | <i>PLTP</i>         | 0.0000032        | -0.26 | Brain - Hippocampus    |
|      |      | <i>NEURL2</i>       | 0.0000046        | -0.24 | Lung                   |
|      |      | <i>PLTP</i>         | 0.0000047        | -0.29 | Colon - Sigmoid        |
|      |      | <i>PCIF1</i>        | 0.0000073        | 0.33  | Adrenal Gland          |
|      |      | <i>NEURL2</i>       | 0.0000092        | -0.29 | Artery - Aorta         |
|      |      | <i>RP3-337O18.9</i> | 0.0000099        | -0.21 | Lung                   |
|      |      | <i>PLTP</i>         | 0.000013         | -0.31 | Adrenal Gland          |
|      |      | <i>ZSWIM1</i>       | 0.000017         | -0.25 | Adipose - Visceral     |
|      |      | <i>SNX21</i>        | 0.00002          | 0.13  | Muscle - Skeletal      |
|      |      | <i>PLTP</i>         | 0.000021         | -0.16 | Adipose - Visceral     |
|      |      | <i>NEURL2</i>       | 0.000022         | -0.23 | Thyroid                |
|      |      | <i>ZNF335</i>       | 0.000025         | 0.1   | Whole Blood            |
|      |      | <i>RP3-337O18.9</i> | 0.000027         | -0.2  | Adipose - Subcutaneous |
| 0.99 | 0.98 | <i>SLC12A5</i>      | 0.00000000000061 | -0.57 | Adrenal Gland          |
|      |      | <i>PLTP</i>         | 0.00000000013    | -0.26 | Lung                   |
|      |      | <i>PLTP</i>         | 0.000000048      | -0.24 | Nerve - Tibial         |
|      |      | <i>PLTP</i>         | 0.00000028       | -0.29 | Heart - Left Ventricle |
|      |      | <i>PLTP</i>         | 0.0000003        | -0.19 | Adipose - Subcutaneous |
|      |      | <i>PLTP</i>         | 0.00000052       | -0.19 | Artery - Tibial        |
|      |      | <i>NEURL2</i>       | 0.0000014        | -0.24 | Adipose - Subcutaneous |
|      |      | <i>PLTP</i>         | 0.0000016        | -0.19 | Thyroid                |
|      |      | <i>PLTP</i>         | 0.0000016        | -0.23 | Brain - Frontal Cortex |
|      |      | <i>NEURL2</i>       | 0.0000019        | -0.28 | Adipose - Visceral     |
|      |      | <i>PLTP</i>         | 0.000002         | -0.25 | Artery - Aorta         |
|      |      | <i>PLTP</i>         | 0.0000032        | -0.26 | Brain - Hippocampus    |
|      |      | <i>NEURL2</i>       | 0.0000046        | -0.24 | Lung                   |
|      |      | <i>PLTP</i>         | 0.0000047        | -0.29 | Colon - Sigmoid        |
|      |      | <i>PCIF1</i>        | 0.0000073        | 0.33  | Adrenal Gland          |
|      |      | <i>NEURL2</i>       | 0.0000092        | -0.29 | Artery - Aorta         |
|      |      | <i>RP3-337O18.9</i> | 0.0000099        | -0.21 | Lung                   |
|      |      | <i>PLTP</i>         | 0.000013         | -0.31 | Adrenal Gland          |
|      |      | <i>ZSWIM1</i>       | 0.000017         | -0.25 | Adipose - Visceral     |
|      |      | <i>SNX21</i>        | 0.00002          | 0.13  | Muscle - Skeletal      |
|      |      | <i>PLTP</i>         | 0.000021         | -0.16 | Adipose - Visceral     |
|      |      | <i>NEURL2</i>       | 0.000022         | -0.23 | Thyroid                |
|      |      | <i>ZNF335</i>       | 0.000025         | 0.1   | Whole Blood            |
|      |      | <i>RP3-337O18.9</i> | 0.000027         | -0.2  | Adipose - Subcutaneous |
| 0.99 | 0.99 | <i>SLC12A5</i>      | 0.00000000000012 | -0.57 | Adrenal Gland          |
|      |      | <i>NEURL2</i>       | 0.000000015      | -0.32 | Adipose - Visceral     |
|      |      | <i>PLTP</i>         | 0.000000025      | -0.23 | Lung                   |
|      |      | <i>PLTP</i>         | 0.000000076      | -0.2  | Adipose - Subcutaneous |
|      |      | <i>NEURL2</i>       | 0.000000093      | -0.26 | Adipose - Subcutaneous |
|      |      | <i>PLTP</i>         | 0.00000015       | -0.23 | Nerve - Tibial         |
|      |      | <i>PLTP</i>         | 0.00000017       | -0.32 | Colon - Sigmoid        |
|      |      | <i>ZSWIM1</i>       | 0.00000025       | -0.29 | Adipose - Visceral     |
|      |      | <i>CD40</i>         | 0.00000082       | 0.29  | Adipose - Visceral     |
|      |      | <i>PLTP</i>         | 0.000001         | -0.18 | Artery - Tibial        |

|      |       |                     |                |       |              |
|------|-------|---------------------|----------------|-------|--------------|
|      |       | <i>PLTP</i>         | 0.000001       | -0.27 | Heart - Left |
|      |       | <i>PLTP</i>         | 0.0000015      | -0.18 | Adipose - V  |
|      |       | <i>NEURL2</i>       | 0.0000018      | -0.31 | Artery - Ao  |
|      |       | <i>SNX21</i>        | 0.000003       | 0.15  | Muscle - Sk  |
|      |       | <i>PCIF1</i>        | 0.0000041      | 0.33  | Adrenal Gl   |
|      |       | <i>PLTP</i>         | 0.0000062      | -0.18 | Thyroid      |
|      |       | <i>RP3-337O18.9</i> | 0.0000072      | -0.21 | Adipose - S  |
|      |       | <i>PLTP</i>         | 0.0000088      | -0.32 | Pituitary    |
|      |       | <i>PLTP</i>         | 0.0000089      | -0.21 | Brain - Fror |
|      |       | <i>RP3-337O18.9</i> | 0.0000089      | -0.21 | Lung         |
|      |       | <i>PLTP</i>         | 0.00001        | -0.23 | Artery - Ao  |
|      |       | <i>ZNF335</i>       | 0.000011       | 0.11  | Whole Bloc   |
|      |       | <i>RP3-337O18.9</i> | 0.000015       | -0.25 | Adipose - V  |
|      |       | <i>PLTP</i>         | 0.000017       | -0.25 | Stomach      |
|      |       | <i>SPATA25</i>      | 0.000019       | -0.28 | Adipose - V  |
|      |       | <i>NEURL2</i>       | 0.000043       | -0.21 | Lung         |
| 0.84 | 0.93  | <i>PLTP</i>         | 0.0000000076   | -0.24 | Lung         |
|      |       | <i>SLC12A5</i>      | 0.0000000082   | -0.48 | Adrenal Gl   |
|      |       | <i>PLTP</i>         | 0.00000003     | -0.2  | Artery - Tib |
|      |       | <i>PLTP</i>         | 0.000000057    | -0.23 | Nerve - Tib  |
|      |       | <i>NEURL2</i>       | 0.0000015      | -0.27 | Adipose - V  |
|      |       | <i>PLTP</i>         | 0.0000015      | -0.17 | Adipose - V  |
|      |       | <i>PLTP</i>         | 0.0000018      | -0.26 | Heart - Left |
|      |       | <i>PCIF1</i>        | 0.0000021      | 0.35  | Adrenal Gl   |
|      |       | <i>NEURL2</i>       | 0.0000022      | -0.23 | Adipose - S  |
|      |       | <i>PLTP</i>         | 0.000004       | -0.24 | Artery - Ao  |
|      |       | <i>PLTP</i>         | 0.0000059      | -0.17 | Adipose - S  |
|      |       | <i>PLTP</i>         | 0.0000066      | -0.24 | Brain - Hip  |
|      |       | <i>NEURL2</i>       | 0.00001        | -0.29 | Artery - Ao  |
|      |       | <i>ZSWIM1</i>       | 0.000012       | -0.25 | Adipose - V  |
|      |       | <i>RP3-337O18.9</i> | 0.000012       | -0.21 | Lung         |
|      |       | <i>PLTP</i>         | 0.000019       | -0.27 | Colon - Sigi |
|      |       | <i>PLTP</i>         | 0.00002        | -0.31 | Pituitary    |
|      |       | <i>WFDC3</i>        | 0.000024       | -0.24 | Artery - Tib |
|      |       | <i>NEURL2</i>       | 0.000024       | -0.22 | Lung         |
|      |       | <i>SNX21</i>        | 0.000028       | 0.13  | Muscle - Sk  |
|      |       | <i>RP3-337O18.9</i> | 0.00004        | -0.19 | Adipose - S  |
|      |       | <i>PLTP</i>         | 0.000041       | -0.16 | Thyroid      |
|      |       | <i>NEURL2</i>       | 0.000044       | -0.22 | Thyroid      |
| 0.83 | -0.98 | <i>SLC12A5</i>      | 0.000000000012 | 0.5   | Adrenal Gl   |
|      |       | <i>PLTP</i>         | 0.000000000041 | 0.28  | Nerve - Tib  |
|      |       | <i>NEURL2</i>       | 0.000000000047 | 0.35  | Adipose - V  |
|      |       | <i>PLTP</i>         | 0.00000000011  | 0.23  | Artery - Tib |
|      |       | <i>PLTP</i>         | 0.00000000028  | 0.24  | Lung         |
|      |       | <i>NEURL2</i>       | 0.000000004    | 0.27  | Adipose - S  |
|      |       | <i>PLTP</i>         | 0.0000000059   | 0.35  | Colon - Sigi |
|      |       | <i>ZSWIM1</i>       | 0.0000000059   | 0.31  | Adipose - V  |

|      |      |                     |             |       |              |
|------|------|---------------------|-------------|-------|--------------|
|      |      | <i>PLTP</i>         | 0.000000034 | 0.2   | Adipose - S  |
|      |      | <i>RP3-337O18.9</i> | 0.000000051 | 0.29  | Adipose - V  |
|      |      | <i>RP3-337O18.9</i> | 0.000000013 | 0.24  | Lung         |
|      |      | <i>SPATA25</i>      | 0.000000014 | 0.32  | Adipose - V  |
|      |      | <i>RP3-337O18.9</i> | 0.000000019 | 0.23  | Adipose - S  |
|      |      | <i>PLTP</i>         | 0.000000023 | 0.18  | Adipose - V  |
|      |      | <i>PLTP</i>         | 0.000000091 | 0.25  | Artery - Ao  |
|      |      | <i>SNX21</i>        | 0.00000001  | -0.15 | Muscle - Sk  |
|      |      | <i>CD40</i>         | 0.000000017 | -0.27 | Adipose - V  |
|      |      | <i>NEURL2</i>       | 0.000000044 | 0.23  | Lung         |
|      |      | <i>NEURL2</i>       | 0.000000055 | 0.29  | Artery - Ao  |
|      |      | <i>PLTP</i>         | 0.000000013 | 0.24  | Stomach      |
|      |      | <i>PCIF1</i>        | 0.000000013 | -0.3  | Adrenal Gl   |
|      |      | <i>SNX21</i>        | 0.000000022 | 0.17  | Thyroid      |
|      |      | <i>PLTP</i>         | 0.000000024 | 0.16  | Thyroid      |
|      |      | <i>CD40</i>         | 0.000000047 | -0.19 | Skin - Sun E |
| 0.87 | 0.94 | <i>NEURL2</i>       | 0.000000011 | -0.28 | Adipose - S  |
|      |      | <i>RP3-337O18.9</i> | 0.000000024 | -0.27 | Lung         |
|      |      | <i>PLTP</i>         | 0.000000041 | -0.39 | Adrenal Gl   |
|      |      | <i>PLTP</i>         | 0.000000058 | -0.22 | Lung         |
|      |      | <i>SLC12A5</i>      | 0.000000061 | -0.44 | Adipose - V  |
|      |      | <i>NEURL2</i>       | 0.000000012 | -0.31 | Adipose - V  |
|      |      | <i>RP3-337O18.9</i> | 0.000000019 | -0.3  | Adipose - V  |
|      |      | <i>SPATA25</i>      | 0.000000029 | -0.33 | Adipose - V  |
|      |      | <i>PLTP</i>         | 0.000000005 | -0.19 | Thyroid      |
| 0.86 | 0.94 | <i>NEURL2</i>       | 0.000000009 | -0.28 | Adipose - S  |
|      |      | <i>RP3-337O18.9</i> | 0.000000017 | -0.27 | Lung         |
|      |      | <i>SLC12A5</i>      | 0.000000044 | -0.44 | Adipose - V  |
|      |      | <i>PLTP</i>         | 0.000000048 | -0.38 | Adrenal Gl   |
|      |      | <i>PLTP</i>         | 0.000000053 | -0.22 | Lung         |
|      |      | <i>NEURL2</i>       | 0.000000012 | -0.31 | Adipose - V  |
|      |      | <i>RP3-337O18.9</i> | 0.000000021 | -0.29 | Adipose - V  |
|      |      | <i>PLTP</i>         | 0.000000026 | -0.25 | Artery - Ao  |
|      |      | <i>SPATA25</i>      | 0.000000026 | -0.33 | Adipose - V  |
|      |      | <i>PLTP</i>         | 0.000000046 | -0.17 | Artery - Tib |
| 0.89 | 0.98 | <i>NEURL2</i>       | 0.000000085 | -0.29 | Adipose - S  |
|      |      | <i>SLC12A5</i>      | 0.000000019 | -0.46 | Adipose - V  |
|      |      | <i>RP3-337O18.9</i> | 0.000000024 | -0.27 | Lung         |
|      |      | <i>PLTP</i>         | 0.000000024 | -0.23 | Lung         |
|      |      | <i>PLTP</i>         | 0.000000016 | -0.35 | Adrenal Gl   |
|      |      | <i>PLTP</i>         | 0.000000055 | -0.17 | Artery - Tib |
| 0.98 | 0.99 | <i>NEURL2</i>       | 0.000000085 | -0.28 | Adipose - S  |
|      |      | <i>SLC12A5</i>      | 0.000000019 | -0.46 | Adipose - V  |
|      |      | <i>RP3-337O18.9</i> | 0.000000024 | -0.28 | Lung         |
|      |      | <i>PLTP</i>         | 0.000000024 | -0.24 | Lung         |
|      |      | <i>PLTP</i>         | 0.000000016 | -0.37 | Adrenal Gl   |

|      |      |                     |            |       |              |
|------|------|---------------------|------------|-------|--------------|
| 1    | 1    | <i>SLC12A5</i>      | 0.00000022 | -0.5  | Adipose - V  |
|      |      | <i>PLTP</i>         | 0.0000014  | -0.24 | Lung         |
|      |      | <i>NEURL2</i>       | 0.0000021  | -0.28 | Adipose - S  |
|      |      | <i>PLTP</i>         | 0.0000038  | -0.39 | Adrenal Gl   |
|      |      | <i>RP3-337O18.9</i> | 0.0000044  | -0.26 | Lung         |
|      |      | <i>CD40</i>         | 0.000025   | 0.24  | Skin - Sun E |
|      |      | <i>PLTP</i>         | 0.000036   | -0.18 | Artery - Tib |
| 0.95 | 0.98 | <i>SLC12A5</i>      | 0.00000022 | -0.5  | Adipose - V  |
|      |      | <i>RP3-337O18.9</i> | 0.0000037  | -0.27 | Lung         |
|      |      | <i>PLTP</i>         | 0.0000039  | -0.23 | Lung         |
|      |      | <i>PLTP</i>         | 0.0000051  | -0.39 | Adrenal Gl   |
|      |      | <i>NEURL2</i>       | 0.0000066  | -0.27 | Adipose - S  |
|      |      | <i>CD40</i>         | 0.00003    | 0.24  | Skin - Sun E |
|      |      | <i>PLTP</i>         | 0.00005    | -0.18 | Artery - Tib |
| 0.95 | 0.98 | <i>SLC12A5</i>      | 0.00000022 | -0.5  | Adipose - V  |
|      |      | <i>PLTP</i>         | 0.0000023  | -0.24 | Lung         |
|      |      | <i>RP3-337O18.9</i> | 0.0000032  | -0.27 | Lung         |
|      |      | <i>PLTP</i>         | 0.0000038  | -0.39 | Adrenal Gl   |
|      |      | <i>NEURL2</i>       | 0.0000066  | -0.27 | Adipose - S  |
|      |      | <i>CD40</i>         | 0.00003    | 0.24  | Skin - Sun E |
|      |      | <i>PLTP</i>         | 0.00005    | -0.18 | Artery - Tib |
| 0.95 | 0.98 | <i>SLC12A5</i>      | 0.00000022 | -0.5  | Adipose - V  |
|      |      | <i>PLTP</i>         | 0.0000023  | -0.24 | Lung         |
|      |      | <i>RP3-337O18.9</i> | 0.0000032  | -0.27 | Lung         |
|      |      | <i>PLTP</i>         | 0.0000038  | -0.39 | Adrenal Gl   |
|      |      | <i>NEURL2</i>       | 0.0000066  | -0.27 | Adipose - S  |
|      |      | <i>CD40</i>         | 0.00003    | 0.24  | Skin - Sun E |
|      |      | <i>PLTP</i>         | 0.00005    | -0.18 | Artery - Tib |
| 0.95 | 0.98 | <i>SLC12A5</i>      | 0.00000022 | -0.5  | Adipose - V  |
|      |      | <i>PLTP</i>         | 0.0000023  | -0.24 | Lung         |
|      |      | <i>RP3-337O18.9</i> | 0.0000032  | -0.27 | Lung         |
|      |      | <i>PLTP</i>         | 0.0000038  | -0.39 | Adrenal Gl   |
|      |      | <i>NEURL2</i>       | 0.0000066  | -0.27 | Adipose - S  |
|      |      | <i>CD40</i>         | 0.00003    | 0.24  | Skin - Sun E |
|      |      | <i>PLTP</i>         | 0.00005    | -0.18 | Artery - Tib |
| 0.95 | 0.98 | <i>SLC12A5</i>      | 0.00000022 | -0.5  | Adipose - V  |
|      |      | <i>PLTP</i>         | 0.0000023  | -0.24 | Lung         |
|      |      | <i>RP3-337O18.9</i> | 0.0000032  | -0.27 | Lung         |
|      |      | <i>PLTP</i>         | 0.0000038  | -0.39 | Adrenal Gl   |
|      |      | <i>NEURL2</i>       | 0.0000066  | -0.27 | Adipose - S  |
|      |      | <i>CD40</i>         | 0.00003    | 0.24  | Skin - Sun E |
|      |      | <i>PLTP</i>         | 0.00005    | -0.18 | Artery - Tib |
| 0.95 | 0.98 | <i>SLC12A5</i>      | 0.00000022 | -0.5  | Adipose - V  |
|      |      | <i>PLTP</i>         | 0.0000023  | -0.24 | Lung         |
|      |      | <i>RP3-337O18.9</i> | 0.0000032  | -0.27 | Lung         |
|      |      | <i>PLTP</i>         | 0.0000038  | -0.39 | Adrenal Gl   |
|      |      | <i>NEURL2</i>       | 0.0000066  | -0.27 | Adipose - S  |
|      |      | <i>CD40</i>         | 0.00003    | 0.24  | Skin - Sun E |
|      |      | <i>PLTP</i>         | 0.00005    | -0.18 | Artery - Tib |
| 0.91 | 0.97 | <i>SLC12A5</i>      | 0.00000022 | -0.5  | Adipose - V  |
|      |      | <i>RP3-337O18.9</i> | 0.0000037  | -0.27 | Lung         |
|      |      | <i>PLTP</i>         | 0.0000039  | -0.23 | Lung         |
|      |      | <i>PLTP</i>         | 0.0000051  | -0.39 | Adrenal Gl   |
|      |      | <i>NEURL2</i>       | 0.0000066  | -0.27 | Adipose - S  |



|      |      |                     |                     |       |              |
|------|------|---------------------|---------------------|-------|--------------|
|      |      | <i>CD40</i>         | 0.00003             | 0.24  | Skin - Sun E |
|      |      | <i>PLTP</i>         | 0.00005             | -0.18 | Artery - Tib |
| 0.94 | 0.98 | <i>SLC12A5</i>      | 0.00000036          | -0.49 | Adipose - V  |
|      |      | <i>PLTP</i>         | 0.0000033           | -0.23 | Lung         |
|      |      | <i>PLTP</i>         | 0.0000051           | -0.39 | Adrenal Gl   |
|      |      | <i>NEURL2</i>       | 0.0000066           | -0.27 | Adipose - S  |
|      |      | <i>RP3-337O18.9</i> | 0.000011            | -0.26 | Lung         |
|      |      | <i>PLTP</i>         | 0.000029            | -0.26 | Artery - Ao  |
|      |      | <i>PLTP</i>         | 0.000057            | -0.18 | Artery - Tib |
| 0.92 | 0.97 | <i>PLTP</i>         | 0.000016            | 0.39  | Esophagus    |
|      |      | <i>PLTP</i>         | 0.000035            | 0.33  | Skin - Sun E |
| 0.94 | 0.98 | <i>SLC12A5</i>      | 0.00000000000000019 | 0.58  | Lung         |
|      |      | <i>SLC12A5</i>      | 0.000000000000022   | 0.75  | Adipose - V  |
|      |      | <i>SLC12A5</i>      | 0.0000000053        | 0.54  | Adipose - S  |
|      |      | <i>SLC12A5</i>      | 0.00000012          | -0.62 | Adrenal Gl   |
|      |      | <i>SLC12A5</i>      | 0.00000015          | 0.63  | Artery - Ao  |
|      |      | <i>SLC12A5</i>      | 0.00000033          | 0.66  | Breast - Ma  |
|      |      | <i>SLC12A5</i>      | 0.00000046          | 0.74  | Spleen       |
|      |      | <i>SNX21</i>        | 0.0000006           | 0.21  | Muscle - Sk  |
|      |      | <i>SLC12A5</i>      | 0.0000026           | 0.46  | Thyroid      |
|      |      | <i>SLC12A5</i>      | 0.00001             | 0.4   | Nerve - Tib  |
|      |      | <i>SLC12A5</i>      | 0.000022            | 0.46  | Skin - Not S |
|      |      | <i>PLTP</i>         | 0.000031            | -0.24 | Nerve - Tib  |
|      |      | <i>SLC12A5</i>      | 0.000034            | 0.38  | Skin - Sun E |
| 0.94 | 0.98 | <i>SLC12A5</i>      | 0.00000000000000019 | 0.58  | Lung         |
|      |      | <i>SLC12A5</i>      | 0.000000000000022   | 0.75  | Adipose - V  |
|      |      | <i>SLC12A5</i>      | 0.0000000053        | 0.54  | Adipose - S  |
|      |      | <i>SLC12A5</i>      | 0.000000098         | -0.63 | Adrenal Gl   |
|      |      | <i>SLC12A5</i>      | 0.00000015          | 0.63  | Artery - Ao  |
|      |      | <i>SLC12A5</i>      | 0.00000023          | 0.67  | Breast - Ma  |
|      |      | <i>SLC12A5</i>      | 0.00000025          | 0.77  | Spleen       |
|      |      | <i>SNX21</i>        | 0.0000006           | 0.21  | Muscle - Sk  |
|      |      | <i>SLC12A5</i>      | 0.000007            | 0.44  | Thyroid      |
|      |      | <i>SLC12A5</i>      | 0.00001             | 0.4   | Nerve - Tib  |
|      |      | <i>SLC12A5</i>      | 0.000028            | 0.46  | Skin - Not S |
|      |      | <i>PLTP</i>         | 0.000031            | -0.24 | Nerve - Tib  |
|      |      | <i>SLC12A5</i>      | 0.000034            | 0.38  | Skin - Sun E |
| 0.84 | 0.98 | <i>SLC12A5</i>      | 0.0000000000000033  | 0.8   | Adipose - V  |
|      |      | <i>SLC12A5</i>      | 0.000000000000026   | 0.54  | Lung         |
|      |      | <i>SLC12A5</i>      | 0.00000004          | 0.84  | Spleen       |
|      |      | <i>SLC12A5</i>      | 0.00000012          | 0.51  | Adipose - S  |
|      |      | <i>SLC12A5</i>      | 0.00000026          | 0.64  | Artery - Ao  |
|      |      | <i>SNX21</i>        | 0.00000039          | 0.23  | Muscle - Sk  |
|      |      | <i>SLC12A5</i>      | 0.0000046           | -0.57 | Adrenal Gl   |
|      |      | <i>SLC12A5</i>      | 0.000014            | 0.41  | Nerve - Tib  |

|      |   |                |                      |          |              |
|------|---|----------------|----------------------|----------|--------------|
|      |   | <i>PLTP</i>    | 0.000018             | -0.26    | Nerve - Tib  |
|      |   | <i>PLTP</i>    | 0.000019             | -0.28    | Lung         |
|      |   | <i>SLC12A5</i> | 0.000021             | 0.59     | Breast - M   |
|      |   | <i>SLC12A5</i> | 0.000025             | 0.4      | Skin - Sun E |
|      |   | <i>SLC12A5</i> | 0.000028             | 0.42     | Thyroid      |
|      |   | <i>SLC12A5</i> | 0.000036             | 0.47     | Skin - Not S |
|      |   | <i>WFDC3</i>   | 0.000058             | -0.4     | Nerve - Tib  |
| 0.98 | 1 | <i>SLC12A5</i> | 0.000000000000000059 | 0.61     | Lung         |
|      |   | <i>SLC12A5</i> | 0.0000000000000016   | 0.8      | Adipose - V  |
|      |   | <i>SLC12A5</i> | 0.00000000002        | 0.61     | Adipose - S  |
|      |   | <i>SLC12A5</i> | 0.000000045          | 0.69     | Breast - M   |
|      |   | <i>SLC12A5</i> | 0.000000082          | 0.63     | Artery - Ao  |
|      |   | <i>SLC12A5</i> | 0.00000018           | 0.78     | Spleen       |
|      |   | <i>SNX21</i>   | 0.00000098           | 0.21     | Muscle - Sk  |
|      |   | <i>SLC12A5</i> | 0.0000023            | -0.56    | Adrenal Gl   |
|      |   | <i>SLC12A5</i> | 0.0000024            | 0.43     | Nerve - Tib  |
|      |   | <i>SLC12A5</i> | 0.0000024            | 0.45     | Thyroid      |
|      |   | <i>SLC12A5</i> | 0.0000035            | 43466.00 | Uterus       |
|      |   | <i>SLC12A5</i> | 0.0000054            | 0.41     | Skin - Sun E |
|      |   | <i>SLC12A5</i> | 0.00001              | 0.48     | Skin - Not S |
|      |   | <i>PLTP</i>    | 0.000056             | -0.24    | Nerve - Tib  |
| 0.98 | 1 | <i>SLC12A5</i> | 0.000000000000000059 | 0.61     | Lung         |
|      |   | <i>SLC12A5</i> | 0.0000000000000016   | 0.8      | Adipose - V  |
|      |   | <i>SLC12A5</i> | 0.000000000045       | 0.6      | Adipose - S  |
|      |   | <i>SLC12A5</i> | 0.000000045          | 0.69     | Breast - M   |
|      |   | <i>SLC12A5</i> | 0.000000082          | 0.63     | Artery - Ao  |
|      |   | <i>SLC12A5</i> | 0.00000018           | 0.78     | Spleen       |
|      |   | <i>SLC12A5</i> | 0.00000019           | -0.61    | Adrenal Gl   |
|      |   | <i>SNX21</i>   | 0.00000099           | 0.21     | Muscle - Sk  |
|      |   | <i>SLC12A5</i> | 0.0000029            | 0.45     | Thyroid      |
|      |   | <i>SLC12A5</i> | 0.0000037            | 0.43     | Nerve - Tib  |
|      |   | <i>SLC12A5</i> | 0.0000038            | 43466.00 | Uterus       |
|      |   | <i>SLC12A5</i> | 0.0000053            | 0.41     | Skin - Sun E |
|      |   | <i>SLC12A5</i> | 0.00001              | 0.48     | Skin - Not S |
|      |   | <i>PLTP</i>    | 0.000028             | -0.25    | Nerve - Tib  |
| 0.99 | 1 | <i>SLC12A5</i> | 8.9E-22              | 0.66     | Lung         |
|      |   | <i>SLC12A5</i> | 0.0000000000000002   | 0.81     | Adipose - V  |
|      |   | <i>SLC12A5</i> | 0.00000000000003     | 0.68     | Adipose - S  |
|      |   | <i>SLC12A5</i> | 0.00000000011        | 0.77     | Breast - M   |
|      |   | <i>SLC12A5</i> | 0.00000000015        | 0.88     | Spleen       |
|      |   | <i>SLC12A5</i> | 0.000000023          | 0.67     | Artery - Ao  |
|      |   | <i>SLC12A5</i> | 0.00000014           | 0.49     | Thyroid      |
|      |   | <i>SLC12A5</i> | 0.00000038           | 43466.00 | Uterus       |
|      |   | <i>SLC12A5</i> | 0.0000029            | 0.44     | Nerve - Tib  |
|      |   | <i>SNX21</i>   | 0.0000032            | 0.2      | Muscle - Sk  |
|      |   | <i>SLC12A5</i> | 0.0000058            | 0.41     | Skin - Sun E |
|      |   | <i>SLC12A5</i> | 0.000014             | 0.66     | Artery - Co  |

|      |   |         |                       |          |              |
|------|---|---------|-----------------------|----------|--------------|
| 0.99 | 1 | SLC12A5 | 0.000031              | 0.44     | Skin - Not S |
|      |   | SLC12A5 | 0.0000000000000000005 | 0.63     | Lung         |
|      |   | SLC12A5 | 0.0000000000000034    | 0.79     | Adipose - V  |
|      |   | SLC12A5 | 0.00000000000083      | 0.62     | Adipose - S  |
|      |   | SLC12A5 | 0.000000012           | 0.71     | Breast - M   |
|      |   | SLC12A5 | 0.000000055           | 0.78     | Spleen       |
|      |   | SLC12A5 | 0.00000006            | 0.65     | Artery - Ao  |
|      |   | SLC12A5 | 0.00000095            | 0.45     | Skin - Sun E |
|      |   | SLC12A5 | 0.0000015             | 0.46     | Nerve - Tib  |
|      |   | SLC12A5 | 0.0000016             | 0.46     | Thyroid      |
|      |   | SLC12A5 | 0.000002              | 0.51     | Skin - Not S |
|      |   | SLC12A5 | 0.0000021             | -0.57    | Adrenal Gl   |
|      |   | SLC12A5 | 0.0000038             | 43466.00 | Uterus       |
|      |   | SNX21   | 0.0000049             | 0.2      | Muscle - Sk  |
| 1    | 1 | SLC12A5 | 7.5E-22               | 0.65     | Lung         |
|      |   | SLC12A5 | 0.000000000000000087  | 0.81     | Adipose - V  |
|      |   | SLC12A5 | 0.000000000000001     | 0.71     | Adipose - S  |
|      |   | SLC12A5 | 0.0000000000032       | 0.79     | Breast - M   |
|      |   | SLC12A5 | 0.00000000004         | 0.87     | Spleen       |
|      |   | SLC12A5 | 0.000000033           | 0.66     | Artery - Ao  |
|      |   | SLC12A5 | 0.00000029            | 0.48     | Thyroid      |
|      |   | SLC12A5 | 0.00000038            | 43466.00 | Uterus       |
|      |   | SLC12A5 | 0.00000053            | 0.47     | Nerve - Tib  |
|      |   | SLC12A5 | 0.0000012             | 0.43     | Skin - Sun E |
|      |   | SNX21   | 0.0000028             | 0.2      | Muscle - Sk  |
|      |   | SLC12A5 | 0.000014              | 0.66     | Artery - Co  |
|      |   | SLC12A5 | 0.000031              | 0.44     | Skin - Not S |
|      |   | SLC12A5 | 3E-21                 | 0.66     | Lung         |
| 1    | 1 | SLC12A5 | 0.0000000000000004    | 0.8      | Adipose - V  |
|      |   | SLC12A5 | 0.000000000000007     | 0.69     | Adipose - S  |
|      |   | SLC12A5 | 0.000000000099        | 0.88     | Spleen       |
|      |   | SLC12A5 | 0.00000000036         | 0.76     | Breast - M   |
|      |   | SLC12A5 | 0.0000002             | 0.49     | Thyroid      |
|      |   | SLC12A5 | 0.00000021            | 0.62     | Artery - Ao  |
|      |   | SLC12A5 | 0.00000024            | 0.48     | Nerve - Tib  |
|      |   | SLC12A5 | 0.00000026            | 43466.00 | Uterus       |
|      |   | SLC12A5 | 0.00000034            | 0.46     | Skin - Sun E |
|      |   | SLC12A5 | 0.0000046             | 0.49     | Skin - Not S |
|      |   | SLC12A5 | 0.0000056             | 0.7      | Artery - Co  |
|      |   | SNX21   | 0.000013              | 0.18     | Muscle - Sk  |
|      |   | SLC12A5 | 0.000019              | -0.51    | Adrenal Gl   |
|      |   | SLC12A5 | 1.7E-21               | 0.65     | Lung         |
| 0.98 | 1 | SLC12A5 | 0.0000000000000016    | 0.81     | Adipose - V  |
|      |   | SLC12A5 | 0.0000000000000025    | 0.7      | Adipose - S  |
|      |   | SLC12A5 | 0.00000000004         | 0.87     | Spleen       |
|      |   | SLC12A5 | 0.000000000069        | 0.79     | Breast - M   |
|      |   | SLC12A5 | 0.000000056           | 0.65     | Artery - Ao  |
|      |   | SLC12A5 |                       |          |              |

|      |      |                |                      |          |              |
|------|------|----------------|----------------------|----------|--------------|
|      |      | <i>SLC12A5</i> | 0.00000017           | 0.5      | Thyroid      |
|      |      | <i>SLC12A5</i> | 0.00000038           | 43466.00 | Uterus       |
|      |      | <i>SLC12A5</i> | 0.00000055           | 0.47     | Nerve - Tib  |
|      |      | <i>SLC12A5</i> | 0.0000013            | 0.43     | Skin - Sun E |
|      |      | <i>SNX21</i>   | 0.000003             | 0.2      | Muscle - Sk  |
|      |      | <i>SLC12A5</i> | 0.000014             | 0.66     | Artery - Co  |
| 0.95 | 0.97 | <i>SLC12A5</i> | 2.1E-21              | 0.66     | Lung         |
|      |      | <i>SLC12A5</i> | 0.00000000000000035  | 0.81     | Adipose - V  |
|      |      | <i>SLC12A5</i> | 0.00000000000000039  | 0.7      | Adipose - S  |
|      |      | <i>SLC12A5</i> | 0.00000000042        | 0.76     | Breast - M   |
|      |      | <i>SLC12A5</i> | 0.00000000078        | 0.87     | Spleen       |
|      |      | <i>SLC12A5</i> | 0.000000015          | 0.67     | Artery - Ao  |
|      |      | <i>SLC12A5</i> | 0.000000095          | 0.5      | Thyroid      |
|      |      | <i>SLC12A5</i> | 0.00000061           | 0.47     | Nerve - Tib  |
|      |      | <i>SLC12A5</i> | 0.0000016            | 0.43     | Skin - Sun E |
|      |      | <i>SLC12A5</i> | 0.0000024            | 1.00     | Uterus       |
|      |      | <i>SNX21</i>   | 0.0000031            | 0.2      | Muscle - Sk  |
|      |      | <i>PLTP</i>    | 0.000017             | -0.43    | Pituitary    |
| 0.84 | 1    | <i>SLC12A5</i> | 0.0000000000018      | 0.45     | Lung         |
|      |      | <i>SLC12A5</i> | 0.0000000000023      | 0.62     | Adipose - V  |
|      |      | <i>SLC12A5</i> | 0.0000000000036      | 0.51     | Adipose - S  |
|      |      | <i>SLC12A5</i> | 0.000000028          | 0.53     | Breast - M   |
|      |      | <i>SLC12A5</i> | 0.000003             | 0.61     | Spleen       |
|      |      | <i>RPL13P2</i> | 0.000013             | -0.47    | Testis       |
| 0.91 | 0.98 | <i>SLC12A5</i> | 8.9E-22              | 0.66     | Lung         |
|      |      | <i>SLC12A5</i> | 0.000000000000000086 | 0.82     | Adipose - V  |
|      |      | <i>SLC12A5</i> | 0.00000000000000019  | 0.71     | Adipose - S  |
|      |      | <i>SLC12A5</i> | 0.0000000000032      | 0.79     | Breast - M   |
|      |      | <i>SLC12A5</i> | 0.0000000000046      | 0.89     | Spleen       |
|      |      | <i>SLC12A5</i> | 0.000000033          | 0.66     | Artery - Ao  |
|      |      | <i>SLC12A5</i> | 0.00000029           | 0.48     | Thyroid      |
|      |      | <i>SLC12A5</i> | 0.00000038           | 43466.00 | Uterus       |
|      |      | <i>SLC12A5</i> | 0.00000053           | 0.47     | Nerve - Tib  |
|      |      | <i>SLC12A5</i> | 0.0000011            | 0.44     | Skin - Sun E |
|      |      | <i>SNX21</i>   | 0.0000065            | 0.19     | Muscle - Sk  |
|      |      | <i>SLC12A5</i> | 0.000014             | 0.66     | Artery - Co  |
|      |      | <i>SLC12A5</i> | 0.000031             | 0.44     | Skin - Not S |
