# Supplementary material for: Matrix Metalloproteinase Gene Polymorphisms Are Associated with Breast Cancer in the Caucasian Women of Russia
Source: MDPI journal article supplement (doi:10.3390/ijms232012638), 2022-10-20
Supplement: s1 [file s1]

Supplementary table S4 Regulatory effects of the ten BC-associated SNPs of the *M*  
( HaploReg, v4.1, <http://archive.broadinstitute.org/mammals/haploreg/haploreg.php>)

Query SNP: **rs1940475** and variants with  $r^2 \geq 0.8$

|     |            | LD        | LD   |                            |     |     |      | AFR  | AMR  | ASN  | EUR  | GERP | SiPhy | Promoter histone marks |
|-----|------------|-----------|------|----------------------------|-----|-----|------|------|------|------|------|------|-------|------------------------|
| chr | pos (hg38) | ( $r^2$ ) | (D') | variant                    | Ref | Alt | freq | freq | freq | freq | cons | cons |       |                        |
| 11  | 102721214  | 0.85      | 1    | <a href="#">rs2186602</a>  | T   | C   | 0.81 | 0.59 | 0.60 | 0.57 |      |      |       |                        |
| 11  | 102722311  | 0.85      | 1    | <a href="#">rs948218</a>   | T   | A   | 0.81 | 0.59 | 0.60 | 0.57 |      |      |       |                        |
| 11  | 102722322  |           | 1    | <a href="#">rs1940474</a>  | G   | T   | 0.65 | 0.54 | 0.59 | 0.53 |      |      |       |                        |
| 11  | 102722517  |           | 1    | <a href="#">rs1940475</a>  | T   | C   | 0.72 | 0.54 | 0.59 | 0.53 |      |      |       |                        |
| 11  | 102723248  | 0.85      | 1    | <a href="#">rs7123658</a>  | A   | T   | 0.81 | 0.59 | 0.60 | 0.57 |      |      |       |                        |
| 11  | 102723645  | 0.85      |      | <a href="#">rs6590983</a>  | A   | C   | 0.81 | 0.59 | 0.60 | 0.57 |      |      |       |                        |
| 11  | 102724404  |           | 1    | <a href="#">rs1939012</a>  | T   | C   | 0.76 | 0.54 | 0.59 | 0.53 |      |      |       |                        |
| 11  | 102724761  | 0.85      | 1    | <a href="#">rs3765620</a>  | G   | A   | 0.81 | 0.59 | 0.60 | 0.57 |      |      |       |                        |
| 11  | 102725749  | 0.84      | 1    | <a href="#">rs11225395</a> | A   | G   | 0.81 | 0.59 | 0.60 | 0.57 |      |      |       |                        |
| 11  | 102726340  | 0.84      | 1    | <a href="#">rs33952053</a> | TG  | T   | 0.82 | 0.59 | 0.60 | 0.57 |      |      |       |                        |
| 11  | 102727079  | 0.84      | 1    | <a href="#">rs1939013</a>  | T   | C   | 0.83 | 0.59 | 0.60 | 0.57 |      |      |       |                        |
| 11  | 102727181  | 0.84      | 1    | <a href="#">rs1939014</a>  | A   | T   | 0.81 | 0.59 | 0.60 | 0.57 |      |      |       |                        |
| 11  | 102727628  | 0.84      | 1    | <a href="#">rs3758857</a>  | T   | C   | 0.81 | 0.59 | 0.60 | 0.57 |      |      |       |                        |
| 11  | 102727726  | 0.84      | 1    | <a href="#">rs3758858</a>  | G   | A   | 0.81 | 0.59 | 0.60 | 0.57 |      |      |       | BLD, MUS               |
| 11  | 102727749  | 0.99      | 1    | <a href="#">rs3758859</a>  | C   | A   | 0.65 | 0.54 | 0.59 | 0.53 |      |      |       | BLD, MUS               |
| 11  | 102727924  | 0.84      | 1    | <a href="#">rs6590985</a>  | T   | C   | 0.81 | 0.59 | 0.60 | 0.57 |      |      |       | BLD, MUS               |
| 11  | 102728128  | 0.84      | 1    | <a href="#">rs6590986</a>  | C   | T   | 0.81 | 0.59 | 0.60 | 0.57 |      |      |       |                        |
| 11  | 102729275  | 0.84      | 1    | <a href="#">rs10750653</a> | A   | G   | 0.82 | 0.59 | 0.60 | 0.57 |      |      |       |                        |

Query SNP: **rs1799750** and variants with  $r^2 \geq 0.8$

|     |            | LD        | LD   |                           |     |     |      | AFR  | AMR  | ASN  | EUR  | GERP | SiPhy | Promoter histone marks |
|-----|------------|-----------|------|---------------------------|-----|-----|------|------|------|------|------|------|-------|------------------------|
| chr | pos (hg38) | ( $r^2$ ) | (D') | variant                   | Ref | Alt | freq | freq | freq | freq | cons | cons |       |                        |
| 11  | 102799764  |           | 1    | <a href="#">rs1799750</a> | TC  | T   | 0.55 | 0.44 | 0.33 | 0.49 |      |      |       |                        |

Query SNP: **rs679620** and variants with  $r^2 \geq 0.8$

|     |            | LD        | LD    |                          |     |     |      | AFR  | AMR  | ASN  | EUR  | GERP | SiPhy | Promoter histone marks |
|-----|------------|-----------|-------|--------------------------|-----|-----|------|------|------|------|------|------|-------|------------------------|
| chr | pos (hg38) | ( $r^2$ ) | (D')  | variant                  | Ref | Alt | freq | freq | freq | freq | cons | cons |       |                        |
| 11  | 102807707  | 0.82      | -0.92 | <a href="#">rs526215</a> | C   | T   | 0.04 | 0.34 | 0.15 | 0.45 |      |      |       | ESC, iPSC, LNG         |

|    |           |      |       |                             |   |    |      |      |      |      |
|----|-----------|------|-------|-----------------------------|---|----|------|------|------|------|
| 11 | 102808321 | 0.81 | -0.92 | <a href="#">rs1144396</a>   | C | A  | 0.51 | 0.37 | 0.33 | 0.45 |
| 11 | 102808927 | 0.82 | -0.92 | <a href="#">rs565082</a>    | T | C  | 0.41 | 0.37 | 0.33 | 0.45 |
| 11 | 102811772 | 0.81 | -0.91 | <a href="#">rs502174</a>    | A | C  | 0.42 | 0.37 | 0.32 | 0.45 |
| 11 | 102816687 | 0.83 | -0.93 | <a href="#">rs10791596</a>  | T | C  | 0.41 | 0.36 | 0.33 | 0.45 |
| 11 | 102819770 | 0.89 | -0.96 | <a href="#">rs2097248</a>   | C | T  | 0.41 | 0.37 | 0.33 | 0.47 |
| 11 | 102819867 | 0.84 | -0.92 | <a href="#">rs200587503</a> | T | TG | 0.42 | 0.36 | 0.33 | 0.46 |
| 11 | 102820431 | 0.9  | -0.96 | <a href="#">rs756544</a>    | G | C  | 0.34 | 0.37 | 0.33 | 0.46 |
| 11 | 102820659 | 0.91 | -0.97 | <a href="#">rs12804136</a>  | G | A  | 0.41 | 0.37 | 0.33 | 0.47 |
| 11 | 102820751 | 0.9  | -0.97 | <a href="#">rs11225434</a>  | T | C  | 0.39 | 0.37 | 0.33 | 0.47 |
| 11 | 102821493 | 0.91 | -0.97 | <a href="#">rs7117013</a>   | A | G  | 0.43 | 0.38 | 0.33 | 0.47 |
| 11 | 102822132 | 0.91 | -0.97 | <a href="#">rs10895364</a>  | C | T  | 0.43 | 0.39 | 0.33 | 0.47 |
| 11 | 102822879 | 0.92 | -0.98 | <a href="#">rs12801529</a>  | T | A  | 0.40 | 0.38 | 0.33 | 0.47 |
| 11 | 102823462 | 0.92 | -0.98 | <a href="#">rs10895365</a>  | C | T  | 0.39 | 0.37 | 0.33 | 0.47 |
| 11 | 102825487 | 0.89 | -0.96 | <a href="#">rs6590993</a>   | G | T  | 0.39 | 0.37 | 0.33 | 0.47 |
| 11 | 102825901 | 0.92 | -0.98 | <a href="#">rs6590994</a>   | C | T  | 0.34 | 0.37 | 0.33 | 0.47 |
| 11 | 102826358 | 0.96 | -0.98 | <a href="#">rs10895366</a>  | G | A  | 0.03 | 0.34 | 0.15 | 0.46 |
| 11 | 102826390 | 0.96 | -0.98 | <a href="#">rs7126392</a>   | G | A  | 0.38 | 0.36 | 0.32 | 0.46 |
| 11 | 102826825 | 0.94 | -0.97 | <a href="#">rs2212637</a>   | C | T  | 0.41 | 0.37 | 0.33 | 0.46 |
| 11 | 102827605 | 0.96 | -0.98 | <a href="#">rs12792871</a>  | C | G  | 0.03 | 0.35 | 0.15 | 0.46 |
| 11 | 102827993 | 0.95 | -0.98 | <a href="#">rs7926920</a>   | G | A  | 0.40 | 0.37 | 0.33 | 0.46 |
| 11 | 102828729 | 0.92 | -0.96 | <a href="#">rs7946057</a>   | A | T  | 0.40 | 0.37 | 0.33 | 0.46 |
| 11 | 102830290 | 0.98 | -1    | <a href="#">rs1010698</a>   | G | T  | 0.40 | 0.37 | 0.33 | 0.46 |
| 11 | 102831127 | 0.98 | -1    | <a href="#">rs2155013</a>   | T | C  | 0.40 | 0.37 | 0.33 | 0.46 |
| 11 | 102831532 | 0.98 | -1    | <a href="#">rs4754884</a>   | G | A  | 0.40 | 0.37 | 0.33 | 0.46 |
| 11 | 102832897 | 0.99 | 1     | <a href="#">rs635746</a>    | A | G  | 0.58 | 0.62 | 0.67 | 0.54 |
| 11 | 102833340 | 0.99 | 1     | <a href="#">rs633962</a>    | C | T  | 0.56 | 0.62 | 0.68 | 0.54 |
| 11 | 102833449 | 0.99 | 1     | <a href="#">rs666734</a>    | G | C  | 0.58 | 0.62 | 0.67 | 0.54 |
| 11 | 102834166 | 0.99 | 1     | <a href="#">rs595840</a>    | A | G  | 0.71 | 0.64 | 0.67 | 0.54 |
| 11 | 102836608 | 0.99 | 1     | <a href="#">rs639752</a>    | C | A  | 0.56 | 0.62 | 0.67 | 0.54 |
| 11 | 102837183 | 0.98 | 0.99  | <a href="#">rs575027</a>    | A | G  | 0.58 | 0.62 | 0.67 | 0.54 |
| 11 | 102838694 | 0.98 | 0.99  | <a href="#">rs520540</a>    | A | G  | 0.58 | 0.62 | 0.68 | 0.54 |
| 11 | 102840607 | 1    | 1     | <a href="#">rs591058</a>    | T | C  | 0.69 | 0.63 | 0.67 | 0.54 |
| 11 | 102842734 | 1    | 1     | <a href="#">rs602128</a>    | A | G  | 0.57 | 0.62 | 0.67 | 0.54 |
| 11 | 102842889 | 1    | 1     | <a href="#">rs679620</a>    | T | C  | 0.71 | 0.64 | 0.67 | 0.54 |

4 tissues

FAT, GI

22 tissues

GI

GI

GI

GI

|    |           |      |      |                          |   |   |      |      |      |      |  |  |      |
|----|-----------|------|------|--------------------------|---|---|------|------|------|------|--|--|------|
| 11 | 102843046 | 1    | 1    | <a href="#">rs678815</a> | G | C | 0.69 | 0.63 | 0.67 | 0.54 |  |  |      |
| 11 | 102843985 | 0.99 | 0.99 | <a href="#">rs617819</a> | C | G | 0.71 | 0.64 | 0.67 | 0.54 |  |  |      |
| 11 | 102844950 | 0.99 | 0.99 | <a href="#">rs632478</a> | T | G | 0.69 | 0.63 | 0.67 | 0.54 |  |  |      |
| 11 | 102845590 | 0.99 | 0.99 | <a href="#">rs645419</a> | A | G | 0.69 | 0.63 | 0.67 | 0.54 |  |  |      |
| 11 | 102846249 | 0.95 | 0.99 | <a href="#">rs573521</a> | A | G | 0.68 | 0.63 | 0.66 | 0.53 |  |  | CRVX |

Query SNP: **rs243865** and variants with  $r^2 \geq 0.8$

|     |            | LD        | LD   |                          |     |     | AFR  | AMR  | ASN  | EUR  | GERP | SiPhy | Promoter      |
|-----|------------|-----------|------|--------------------------|-----|-----|------|------|------|------|------|-------|---------------|
| chr | pos (hg38) | ( $r^2$ ) | (D') | variant                  | Ref | Alt | freq | freq | freq | freq | cons | cons  | histone marks |
| 16  | 55477625   | 0.99      | 1    | <a href="#">rs243866</a> | G   | A   | 0.01 | 0.19 | 0.09 | 0.28 |      |       | 5 tissues     |
| 16  | 55477894   |           | 1    | <a href="#">rs243865</a> | C   | T   | 0.02 | 0.19 | 0.09 | 0.27 |      |       | 4 tissues     |
| 16  | 55478410   | 0.99      | 1    | <a href="#">rs243864</a> | T   | G   | 0.02 | 0.19 | 0.09 | 0.28 |      |       | 5 tissues     |
| 16  | 55479711   | 0.92      | 1    | <a href="#">rs243862</a> | C   | T   | 0.02 | 0.18 | 0.09 | 0.26 |      |       | 24 tissues    |

Query SNP: **rs3918242** and variants with  $r^2 \geq 0.8$

|     |            | LD        | LD   |                             |       |     | AFR  | AMR  | ASN  | EUR  | GERP                                                                                  | SiPhy                                                                                 | Promoter      |
|-----|------------|-----------|------|-----------------------------|-------|-----|------|------|------|------|---------------------------------------------------------------------------------------|---------------------------------------------------------------------------------------|---------------|
| chr | pos (hg38) | ( $r^2$ ) | (D') | variant                     | Ref   | Alt | freq | freq | freq | freq | cons                                                                                  | cons                                                                                  | histone marks |
| 20  | 45986352   | 0.89      | 0.95 | <a href="#">rs142450006</a> | TTTTC | T   | 0.07 | 0.10 | 0.17 | 0.17 |                                                                                       |                                                                                       |               |
| 20  | 45986358   | 0.86      | 0.95 | <a href="#">rs201501785</a> | T     | TTC | 0.07 | 0.10 | 0.17 | 0.17 |                                                                                       |                                                                                       |               |
| 20  | 45995328   | 0.95      | 0.98 | <a href="#">rs1888235</a>   | C     | T   | 0.13 | 0.09 | 0.18 | 0.17 |                                                                                       |                                                                                       |               |
| 20  | 46002014   | 0.95      | 0.98 | <a href="#">rs6073984</a>   | A     | G   | 0.13 | 0.09 | 0.17 | 0.17 |                                                                                       |                                                                                       |               |
| 20  | 46003728   | 0.86      | 0.98 | <a href="#">rs6065912</a>   | G     | A   | 0.11 | 0.09 | 0.08 | 0.16 |                                                                                       |                                                                                       |               |
| 20  | 46007096   |           | 1    | <a href="#">rs3918241</a>   | T     | A   | 0.13 | 0.09 | 0.17 | 0.17 |                                                                                       |                                                                                       |               |
| 20  | 46007337   |           | 1    | <a href="#">rs3918242</a>   | C     | T   | 0.12 | 0.09 | 0.17 | 0.17 |                                                                                       |                                                                                       |               |
| 20  | 46011053   | 0.99      | 1    | <a href="#">rs2274755</a>   | G     | T   | 0.16 | 0.10 | 0.16 | 0.18 |  |  | 15 tissues    |
| 20  | 46011936   | 0.99      | 1    | <a href="#">rs2236416</a>   | A     | G   | 0.12 | 0.09 | 0.16 | 0.18 |                                                                                       |                                                                                       | 15 tissues    |
| 20  | 46014472   | 0.98      | 1    | <a href="#">rs17577</a>     | G     | A,C | 0.17 | 0.10 | 0.18 | 0.18 |  |  | 21 tissues    |
| 20  | 46014953   | 0.98      | 1    | <a href="#">rs3918261</a>   | A     | G   | 0.21 | 0.10 | 0.18 | 0.18 |                                                                                       |                                                                                       | 5 tissues     |
| 20  | 46016326   | 0.98      | 1    | <a href="#">rs13925</a>     | G     | A   | 0.15 | 0.10 | 0.18 | 0.18 |  |  |               |
| 20  | 46016700   | 0.96      | 1    | <a href="#">rs3918270</a>   | G     | A   | 0.17 | 0.10 | 0.18 | 0.18 |                                                                                       |                                                                                       |               |
| 20  | 46016954   | 0.93      | 0.97 | <a href="#">rs3918271</a>   | G     | A   | 0.17 | 0.10 | 0.18 | 0.18 |                                                                                       |                                                                                       |               |

|    |          |      |      |                            |   |   |      |      |      |      |  |  |  |
|----|----------|------|------|----------------------------|---|---|------|------|------|------|--|--|--|
| 20 | 46020003 | 0.82 | 1    | <a href="#">rs66553311</a> | C | G | 0.50 | 0.27 | 0.41 | 0.20 |  |  |  |
| 20 | 46021679 | 0.89 | 0.98 | <a href="#">rs10432735</a> | A | T | 0.18 | 0.11 | 0.18 | 0.19 |  |  |  |

Query SNP: **rs3918249** and variants with  $r^2 \geq 0.8$

|     |            | LD        | LD    |                           |     |     | AFR  | AMR  | ASN  | EUR  | GERP | SiPhy | Promoter      |
|-----|------------|-----------|-------|---------------------------|-----|-----|------|------|------|------|------|-------|---------------|
| chr | pos (hg38) | ( $r^2$ ) | (D')  | variant                   | Ref | Alt | freq | freq | freq | freq | cons | cons  | histone marks |
| 20  | 45987758   | 0.83      | 0.94  | <a href="#">rs6017721</a> | A   | G   | 0.71 | 0.34 | 0.75 | 0.41 |      |       | SKIN          |
| 20  | 46005037   | 0.94      | 0.99  | <a href="#">rs3848721</a> | C   | T   | 0.49 | 0.29 | 0.72 | 0.40 |      |       | 9 tissues     |
| 20  | 46005181   | 0.94      | 0.99  | <a href="#">rs3848722</a> | A   | G   | 0.72 | 0.32 | 0.72 | 0.40 |      |       | 11 tissues    |
| 20  | 46005911   | 0.9       | 0.96  | <a href="#">rs4810482</a> | T   | C   | 0.72 | 0.32 | 0.72 | 0.39 |      |       | BRN, GI, ADRL |
| 20  | 46006273   | 0.85      | 0.99  | <a href="#">rs3761158</a> | G   | A   | 0.73 | 0.43 | 0.76 | 0.42 |      |       |               |
| 20  | 46006318   | 0.95      | 0.99  | <a href="#">rs3761159</a> | C   | T   | 0.43 | 0.29 | 0.72 | 0.40 |      |       |               |
| 20  | 46006464   | 0.99      | 0.99  | <a href="#">rs6065913</a> | C   | T   | 0.34 | 0.28 | 0.72 | 0.39 |      |       | BLD           |
| 20  | 46006977   | 0.99      | 0.99  | <a href="#">rs3918240</a> | C   | T   | 0.34 | 0.28 | 0.72 | 0.39 |      |       |               |
| 20  | 46009497   | 1         | 1     | <a href="#">rs3918249</a> | T   | C   | 0.56 | 0.31 | 0.72 | 0.39 |      |       | 4 tissues     |
| 20  | 46010142   | 0.83      | 0.92  | <a href="#">rs3918251</a> | A   | G   | 0.52 | 0.30 | 0.64 | 0.40 |      |       | 4 tissues     |
| 20  | 46011586   | 0.99      | 0.99  | <a href="#">rs17576</a>   | A   | G   | 0.35 | 0.28 | 0.72 | 0.39 |      |       | 17 tissues    |
| 20  | 46014194   | 0.82      | -0.98 | <a href="#">rs13969</a>   | A   | C   | 0.38 | 0.49 | 0.24 | 0.57 |      |       | 23 tissues    |

Query SNP: **rs17576** and variants with  $r^2 \geq 0.8$

|     |            | LD        | LD   |                           |     |     | AFR  | AMR  | ASN  | EUR  | GERP | SiPhy | Promoter      |
|-----|------------|-----------|------|---------------------------|-----|-----|------|------|------|------|------|-------|---------------|
| chr | pos (hg38) | ( $r^2$ ) | (D') | variant                   | Ref | Alt | freq | freq | freq | freq | cons | cons  | histone marks |
| 20  | 45987758   | 0.82      | 0.94 | <a href="#">rs6017721</a> | A   | G   | 0.71 | 0.34 | 0.75 | 0.41 |      |       | SKIN          |
| 20  | 46005037   | 0.92      | 0.99 | <a href="#">rs3848721</a> | C   | T   | 0.49 | 0.29 | 0.72 | 0.40 |      |       | 9 tissues     |
| 20  | 46005181   | 0.92      | 0.99 | <a href="#">rs3848722</a> | A   | G   | 0.72 | 0.32 | 0.72 | 0.40 |      |       | 11 tissues    |
| 20  | 46005911   | 0.89      | 0.96 | <a href="#">rs4810482</a> | T   | C   | 0.72 | 0.32 | 0.72 | 0.39 |      |       | BRN, GI, ADRL |
| 20  | 46006273   | 0.84      | 0.99 | <a href="#">rs3761158</a> | G   | A   | 0.73 | 0.43 | 0.76 | 0.42 |      |       |               |
| 20  | 46006318   | 0.94      | 0.99 | <a href="#">rs3761159</a> | C   | T   | 0.43 | 0.29 | 0.72 | 0.40 |      |       |               |
| 20  | 46006464   | 0.98      | 0.99 | <a href="#">rs6065913</a> | C   | T   | 0.34 | 0.28 | 0.72 | 0.39 |      |       | BLD           |

|    |          |      |       |                           |   |   |      |      |      |      |  |  |            |
|----|----------|------|-------|---------------------------|---|---|------|------|------|------|--|--|------------|
| 20 | 46006977 | 0.98 | 0.99  | <a href="#">rs3918240</a> | C | T | 0.34 | 0.28 | 0.72 | 0.39 |  |  |            |
| 20 | 46009497 | 0.99 | 0.99  | <a href="#">rs3918249</a> | T | C | 0.56 | 0.31 | 0.72 | 0.39 |  |  | 4 tissues  |
| 20 | 46010142 | 0.84 | 0.93  | <a href="#">rs3918251</a> | A | G | 0.52 | 0.30 | 0.64 | 0.40 |  |  | 4 tissues  |
| 20 | 46011586 | 1    | 1     | <a href="#">rs17576</a>   | A | G | 0.35 | 0.28 | 0.72 | 0.39 |  |  | 17 tissues |
| 20 | 46014194 | 0.83 | -0.98 | <a href="#">rs13969</a>   | A | C | 0.38 | 0.49 | 0.24 | 0.57 |  |  | 23 tissues |

Query SNP: **rs3787268** and variants with  $r^2 \geq 0.8$

|     |            | LD        | LD   |                            |     |     | AFR  | AMR  | ASN  | EUR  | GERP | SiPhy | Promoter histone marks |
|-----|------------|-----------|------|----------------------------|-----|-----|------|------|------|------|------|-------|------------------------|
| chr | pos (hg38) | ( $r^2$ ) | (D') | variant                    | Ref | Alt | freq | freq | freq | freq | cons | cons  |                        |
| 20  | 45991015   | 0.87      | 0.94 | <a href="#">rs35610751</a> | C   | G   | 0.10 | 0.17 | 0.35 | 0.21 |      |       |                        |
| 20  | 45991065   | 0.86      | 0.94 | <a href="#">rs6073980</a>  | G   | A   | 0.13 | 0.17 | 0.35 | 0.22 |      |       |                        |
| 20  | 46001252   | 0.89      | 0.98 | <a href="#">rs6073983</a>  | A   | T   | 0.09 | 0.16 | 0.36 | 0.22 |      |       | FAT, BLD               |
| 20  | 46006183   | 0.98      | 0.99 | <a href="#">rs3761157</a>  | C   | T   | 0.09 | 0.16 | 0.36 | 0.21 |      |       |                        |
| 20  | 46013092   | 1         | 1    | <a href="#">rs3787268</a>  | G   | A   | 0.09 | 0.16 | 0.36 | 0.21 |      |       | BLD, SKIN              |
| 20  | 46015131   | 1         | 1    | <a href="#">rs3918262</a>  | A   | G   | 0.09 | 0.16 | 0.36 | 0.21 |      |       | LIV                    |
| 20  | 46022571   | 0.95      | 0.98 | <a href="#">rs6073989</a>  | G   | T   | 0.09 | 0.16 | 0.36 | 0.21 |      |       | 24 tissues             |
| 20  | 46023675   | 0.95      | 0.98 | <a href="#">rs16991010</a> | A   | C   | 0.09 | 0.16 | 0.36 | 0.21 |      |       |                        |
| 20  | 46024480   | 0.95      | 0.98 | <a href="#">rs6130998</a>  | C   | T   | 0.09 | 0.16 | 0.37 | 0.21 |      |       |                        |
| 20  | 46026853   | 0.95      | 0.98 | <a href="#">rs6130999</a>  | G   | A   | 0.09 | 0.16 | 0.37 | 0.21 |      |       |                        |
| 20  | 46027473   | 0.95      | 0.98 | <a href="#">rs6073991</a>  | A   | G   | 0.09 | 0.16 | 0.37 | 0.21 |      |       |                        |
| 20  | 46031067   | 0.91      | 0.97 | <a href="#">rs13039389</a> | G   | C   | 0.08 | 0.16 | 0.37 | 0.22 |      |       | ESDR, IPSC, BRN        |
| 20  | 46032717   | 0.94      | 0.98 | <a href="#">rs6131001</a>  | C   | T   | 0.08 | 0.16 | 0.37 | 0.21 |      |       | BRN                    |

Query SNP: **rs2250889** and variants with  $r^2 \geq 0.8$

|     |            | LD        | LD   |                           |     |     | AFR  | AMR  | ASN  | EUR  | GERP | SiPhy | Promoter histone marks |
|-----|------------|-----------|------|---------------------------|-----|-----|------|------|------|------|------|-------|------------------------|
| chr | pos (hg38) | ( $r^2$ ) | (D') | variant                   | Ref | Alt | freq | freq | freq | freq | cons | cons  |                        |
| 20  | 46013767   | 1         | 1    | <a href="#">rs2250889</a> | G   | C   | 0.82 | 0.80 | 0.76 | 0.95 |      |       | 24 tissues             |
| 20  | 46024910   | 0.92      | 0.97 | <a href="#">rs6094239</a> | G   | A   | 0.82 | 0.80 | 0.77 | 0.95 |      |       |                        |

Query SNP: **rs17577** and variants with  $r^2 \geq 0.8$

|     |            | LD                | LD   |                             |       | AFR | AMR  | ASN  | EUR  | GERP | SiPhy       | Promoter    |               |
|-----|------------|-------------------|------|-----------------------------|-------|-----|------|------|------|------|-------------|-------------|---------------|
| chr | pos (hg38) | (r <sup>2</sup> ) | (D') | variant                     | Ref   | Alt | freq | freq | freq | freq | cons        | cons        | histone marks |
| 20  | 45986352   | 0.88              | 0.95 | <a href="#">rs142450006</a> | TTTTC | T   | 0.07 | 0.10 | 0.17 | 0.17 |             |             |               |
| 20  | 45986358   | 0.84              | 0.95 | <a href="#">rs201501785</a> | T     | TTC | 0.07 | 0.10 | 0.17 | 0.17 |             |             |               |
| 20  | 45995328   | 0.94              | 0.98 | <a href="#">rs1888235</a>   | C     | T   | 0.13 | 0.09 | 0.18 | 0.17 |             |             |               |
| 20  | 46002014   | 0.94              | 0.98 | <a href="#">rs6073984</a>   | A     | G   | 0.13 | 0.09 | 0.17 | 0.17 |             |             |               |
| 20  | 46003728   | 0.84              | 0.98 | <a href="#">rs6065912</a>   | G     | A   | 0.11 | 0.09 | 0.08 | 0.16 |             |             |               |
| 20  | 46007096   | 0.98              | 1    | <a href="#">rs3918241</a>   | T     | A   | 0.13 | 0.09 | 0.17 | 0.17 |             |             |               |
| 20  | 46007337   | 0.98              | 1    | <a href="#">rs3918242</a>   | C     | T   | 0.12 | 0.09 | 0.17 | 0.17 |             |             |               |
| 20  | 46011053   | 0.99              | 1    | <a href="#">rs2274755</a>   | G     | T   | 0.16 | 0.10 | 0.16 | 0.18 | <div></div> | <div></div> | 15 tissues    |
| 20  | 46011936   | 0.99              | 1    | <a href="#">rs2236416</a>   | A     | G   | 0.12 | 0.09 | 0.16 | 0.18 |             |             | 15 tissues    |
| 20  | 46014472   | 1                 | 1    | <a href="#">rs17577</a>     | G     | A,C | 0.17 | 0.10 | 0.18 | 0.18 | <div></div> | <div></div> | 21 tissues    |
| 20  | 46014953   | 1                 | 1    | <a href="#">rs3918261</a>   | A     | G   | 0.21 | 0.10 | 0.18 | 0.18 |             |             | 5 tissues     |
| 20  | 46016326   | 1                 | 1    | <a href="#">rs13925</a>     | G     | A   | 0.15 | 0.10 | 0.18 | 0.18 | <div></div> | <div></div> |               |
| 20  | 46016700   | 0.98              | 1    | <a href="#">rs3918270</a>   | G     | A   | 0.17 | 0.10 | 0.18 | 0.18 |             |             |               |
| 20  | 46016954   | 0.95              | 0.97 | <a href="#">rs3918271</a>   | G     | A   | 0.17 | 0.10 | 0.18 | 0.18 |             |             |               |
| 20  | 46020003   | 0.84              | 1    | <a href="#">rs66553311</a>  | C     | G   | 0.50 | 0.27 | 0.41 | 0.20 |             |             |               |
| 20  | 46021679   | 0.91              | 0.98 | <a href="#">rs10432735</a>  | A     | T   | 0.18 | 0.11 | 0.18 | 0.19 | <div></div> |             |               |

# MMP gene and SNPs in high LD ( $r^2 \geq 0.80$ )

| Enhancer histone marks | Proteins   | Motifs                | NHGRI/EBI | GRASP QTL | Selected eQTL | GENCODE          | RefSeq           |
|------------------------|------------|-----------------------|-----------|-----------|---------------|------------------|------------------|
| DNAse                  | bound      | changed               | GWAS hits | hits      | hits          | genes            | genes            |
| BLD                    |            | 5 altered motifs      |           |           | 3 hits        | MMP8             | MMP8             |
| BLD                    |            | TCF4                  |           |           | 3 hits        | MMP8             | MMP8             |
| BLD                    |            | Fox,Foxi1,Foxj2       |           |           | 2 hits        | MMP8             | MMP8             |
| BLD                    | BLD,BLD    | CIZ,Myc,NF-AT1        |           | 1 hit     | 2 hits        | MMP8             | MMP8             |
| BLD                    |            |                       |           |           | 3 hits        | MMP8             | MMP8             |
| BLD                    |            | 27 altered motifs     |           |           | 3 hits        | MMP8             | MMP8             |
| BLD                    |            | HNF1                  | 1 hit     |           | 2 hits        | MMP8             | MMP8             |
| BLD, SKIN              | SKIN       | Foxp1,Sox             |           | 1 hit     | 3 hits        | MMP8             | MMP8             |
| 10 tissues             | SKIN       |                       |           |           | 3 hits        | MMP8             | 794bp 5' of MMP8 |
| BLD, SKIN              |            | Pax-4                 |           |           |               | MMP8             | 1.4kb 5' of MMP8 |
| BLD, SPLN              | KID        | Foxa                  |           |           | 3 hits        | 28bp 5' of MMP8  | 2.1kb 5' of MMP8 |
| BLD, SPLN              |            | 4 altered motifs      |           |           | 3 hits        | 130bp 5' of MMP8 | 2.2kb 5' of MMP8 |
| 7 tissues              | BLD        | EWSR1-FLI1,Pax-5,STAT |           |           | 3 hits        | 577bp 5' of MMP8 | 2.7kb 5' of MMP8 |
| 7 tissues              | SKIN,BLD   | 4 altered motifs      |           |           | 3 hits        | 675bp 5' of MMP8 | 2.8kb 5' of MMP8 |
| 7 tissues              | SKIN,BLD   | HNF4,Ncx              |           |           | 2 hits        | 698bp 5' of MMP8 | 2.8kb 5' of MMP8 |
| 6 tissues              | 8 tissues  | GR,NRSF               |           |           | 3 hits        | 873bp 5' of MMP8 | 3kb 5' of MMP8   |
| 6 tissues              | 20 tissues | 4 bound proteins      |           |           | 3 hits        | 1.1kb 5' of MMP8 | 3.2kb 5' of MMP8 |
|                        | ESDR       |                       |           |           | 2 hits        | 2.2kb 5' of MMP8 | 4.3kb 5' of MMP8 |

| Enhancer histone marks | Proteins  | Motifs     | NHGRI/EBI | GRASP QTL | Selected eQTL | GENCODE          | RefSeq       |
|------------------------|-----------|------------|-----------|-----------|---------------|------------------|--------------|
| DNAse                  | bound     | changed    | GWAS hits | hits      | hits          | genes            | genes        |
| 6 tissues              | 5 tissues | CFOS,GATA2 |           |           | 8 hits        | 1.6kb 5' of MMP1 | LOC100288077 |

| Enhancer histone marks | Proteins | Motifs  | NHGRI/EBI | GRASP QTL | Selected eQTL | GENCODE          | RefSeq       |
|------------------------|----------|---------|-----------|-----------|---------------|------------------|--------------|
| DNAse                  | bound    | changed | GWAS hits | hits      | hits          | genes            | genes        |
| ESC, iPSC              |          |         |           |           | 3 hits        | 9.5kb 5' of MMP1 | LOC100288077 |

|                 |               |                   |                      |        |                  |              |
|-----------------|---------------|-------------------|----------------------|--------|------------------|--------------|
| ESC, ESDR, IPSC | 5 tissues     | CTCF              | NRSF, Sin3A k-20     | 3 hits | 10kb 5' of MMP1  | LOC100288077 |
|                 |               |                   |                      | 3 hits | 11kb 5' of MMP1  | LOC100288077 |
| GI              |               |                   | HDAC2, Irf, p300     | 3 hits | 14kb 5' of MMP1  | LOC100288077 |
|                 | OVRY, GI, LIV | FOXA1, FOXA2      | 4 altered motifs     | 3 hits | 19kb 5' of MMP1  | LOC100288077 |
|                 |               |                   | 4 altered motifs     | 3 hits | 16kb 3' of MMP3  | LOC100288077 |
|                 | BLD           |                   | Ets, HNF4, NF-kappaB | 3 hits | 16kb 3' of MMP3  | LOC100288077 |
|                 |               |                   | HNF1                 | 3 hits | 15kb 3' of MMP3  | LOC100288077 |
|                 |               |                   | 7 altered motifs     | 3 hits | 15kb 3' of MMP3  | LOC100288077 |
|                 |               |                   | Foxp3, Obox 6        | 3 hits | 15kb 3' of MMP3  | LOC100288077 |
|                 |               |                   | 4 altered motifs     | 3 hits | 14kb 3' of MMP3  | LOC100288077 |
|                 |               |                   | EWSR1-FLI1           | 3 hits | 14kb 3' of MMP3  | LOC100288077 |
|                 |               |                   |                      | 3 hits | 13kb 3' of MMP3  | LOC100288077 |
|                 | LNG           |                   | 4 altered motifs     | 3 hits | 12kb 3' of MMP3  | LOC100288077 |
|                 |               |                   | 5 altered motifs     | 3 hits | 10kb 3' of MMP3  | LOC100288077 |
|                 |               |                   |                      | 3 hits | 9.9kb 3' of MMP3 | LOC100288077 |
|                 |               |                   | Sin3Ak-20            | 3 hits | 9.4kb 3' of MMP3 | LOC100288077 |
|                 |               |                   | Glis2, MAZR, Zic     | 3 hits | 9.4kb 3' of MMP3 | LOC100288077 |
|                 |               |                   | ZBRK1, Zfx           | 3 hits | 9kb 3' of MMP3   | LOC100288077 |
|                 |               |                   | ATF3                 | 3 hits | 8.2kb 3' of MMP3 | LOC100288077 |
|                 |               |                   | 4 altered motifs     | 3 hits | 7.8kb 3' of MMP3 | LOC100288077 |
|                 |               |                   | 7 altered motifs     | 3 hits | 7.1kb 3' of MMP3 | LOC100288077 |
|                 | SKIN, BRST    |                   | 4 altered motifs     | 3 hits | 5.5kb 3' of MMP3 | LOC100288077 |
| FAT             | KID           |                   | TCF4                 | 3 hits | 4.7kb 3' of MMP3 | LOC100288077 |
| ESC, IPSC, SKIN | 31 tissues    | CTCF, RAD21, SMC3 | NF-kappaB            | 3 hits | 4.3kb 3' of MMP3 | LOC100288077 |
|                 | GI            |                   | 4 altered motifs     | 3 hits | 2.9kb 3' of MMP3 | LOC100288077 |
|                 |               |                   |                      | 3 hits | 2.5kb 3' of MMP3 | LOC100288077 |
|                 |               |                   | Gfi1, SIX5           | 3 hits | 2.4kb 3' of MMP3 | LOC100288077 |
|                 |               |                   | 5 altered motifs     | 3 hits | 1.6kb 3' of MMP3 | LOC100288077 |
| 13 tissues      | 11 tissues    | P300, TBP, S TAT3 |                      | 3 hits | MMP3             | MMP3         |
| 10 tissues      |               |                   | Maf, PRDM1, Spz1     | 3 hits | MMP3             | MMP3         |
|                 |               |                   |                      | 3 hits | MMP3             | MMP3         |
|                 |               |                   | 4 altered motifs     | 3 hits | MMP3             | MMP3         |
|                 |               |                   | ATF3, PU.1           | 3 hits | MMP3             | MMP3         |
|                 |               |                   | p300                 | 3 hits | MMP3             | MMP3         |



|            |                   |        |                     |       |        |                  |                  |
|------------|-------------------|--------|---------------------|-------|--------|------------------|------------------|
|            | LNG,SKIN,S<br>KIN |        | Hoxd10,Pou<br>3f2   |       | 3 hits | MMP3             | MMP3             |
| FAT, SKIN  | SKIN              |        | Mef2                |       | 3 hits | 181bp 5' of MMP3 | 373bp 5' of MMP3 |
|            |                   |        | ZEB1                |       | 3 hits | 1.1kb 5' of MMP3 | 1.3kb 5' of MMP3 |
|            |                   |        | Hsf,STAT            |       | 3 hits | 1.8kb 5' of MMP3 | 2kb 5' of MMP3   |
| BRST, SKIN |                   | ZNF263 | 8 altered<br>motifs | 1 hit | 3 hits | 2.4kb 5' of MMP3 | 2.6kb 5' of MMP3 |

| Enhancer<br>histone<br>marks | Proteins          | Motifs | NHGR/EBI             | GRASP<br>QTL | Selected<br>eQTL | GENCODE | RefSeq |
|------------------------------|-------------------|--------|----------------------|--------------|------------------|---------|--------|
|                              | DNAse             | bound  | changed              | GWAS hits    | hits             | hits    | genes  |
| 18 tissues                   | MUS,MUS,S<br>KIN  |        | 5 altered<br>motifs  |              | 1 hit            | 1 hit   | MMP2   |
| 15 tissues                   | ESDR,IPSC,<br>MUS |        | Myf                  |              | 1 hit            | 1 hit   | MMP2   |
| 14 tissues                   | 4 tissues         |        | 5 altered<br>motifs  |              | 1 hit            | 1 hit   | MMP2   |
|                              | 19 tissues        |        | 14 altered<br>motifs |              |                  |         | MMP2   |

| Enhancer<br>histone<br>marks | Proteins   | Motifs              | NHGR/EBI             | GRASP<br>QTL | Selected<br>eQTL | GENCODE | RefSeq            |
|------------------------------|------------|---------------------|----------------------|--------------|------------------|---------|-------------------|
|                              | DNAse      | bound               | changed              | GWAS hits    | hits             | hits    | genes             |
|                              |            |                     | 8 altered<br>motifs  |              |                  | 6 hits  | 14kb 5' of ZNF335 |
|                              |            |                     | 9 altered<br>motifs  |              |                  | 5 hits  | 14kb 5' of ZNF335 |
| 10 tissues                   | CRVX       | MAFK                | 8 altered<br>motifs  |              | 4 hits           | 10 hits | 14kb 5' of MMP9   |
| BLD, THYM                    | ESDR       |                     |                      |              | 2 hits           | 6 hits  | 6.9kb 5' of MMP9  |
| 6 tissues                    | ESDR,BLD   |                     | Pax-5                |              | 1 hit            | 9 hits  | 5.2kb 5' of MMP9  |
| BLD, THYM,<br>SPLN           |            |                     | 24 altered<br>motifs |              | 1 hit            | 9 hits  | 1.8kb 5' of MMP9  |
| BLD, THYM,<br>SPLN           | IPSC       |                     | 4 altered<br>motifs  |              | 1 hit            | 6 hits  | 1.6kb 5' of MMP9  |
|                              | 7 tissues  |                     |                      |              | 2 hits           | 9 hits  | MMP9              |
| BLD                          | 33 tissues | 6 bound<br>proteins | NF-Y                 |              | 1 hit            | 9 hits  | MMP9              |
| SKIN                         | 22 tissues | 4 bound<br>proteins |                      |              | 1 hit            | 6 hits  | MMP9              |
| BLD                          | BLD,BRST   |                     | Foxo,GR              |              | 6 hits           | 9 hits  | MMP9              |
|                              |            |                     | 4 altered<br>motifs  |              | 1 hit            | 6 hits  | MMP9              |
|                              |            |                     | 5 altered<br>motifs  |              | 1 hit            | 9 hits  | RP11-465L10.10    |
|                              |            |                     | 8 altered<br>motifs  |              |                  | 6 hits  | RP11-465L10.10    |

|            |                  |  |                     |  |        |                |                     |                   |
|------------|------------------|--|---------------------|--|--------|----------------|---------------------|-------------------|
|            |                  |  | HNF4,Zbtb3          |  | 7 hits | RP11-465L10.10 | 1.7kb 5' of SLC12A5 |                   |
| 21 tissues | 7 bound proteins |  | Pax-4,ZNF219,Zfp281 |  | 1 hit  | 5 hits         | RP11-465L10.10      | 9bp 5' of SLC12A5 |

| Enhancer histone marks | DNase       | Proteins bound   | Motifs changed    | NHGRI/EBI GWAS hits | GRASP QTL hits | Selected eQTL hits | GENCODE genes     | RefSeq genes      |
|------------------------|-------------|------------------|-------------------|---------------------|----------------|--------------------|-------------------|-------------------|
| 7 tissues              | 4 tissues   |                  | 4 altered motifs  |                     | 2 hits         | 20 hits            | 16kb 5' of ZNF335 | 16kb 5' of ZNF335 |
| 15 tissues             | 20 tissues  |                  | SP1,STAT,Zfp281   |                     |                | 9 hits             | 3.9kb 5' of MMP9  | 3.9kb 5' of MMP9  |
| 14 tissues             | 19 tissues  |                  | 4 altered motifs  |                     |                | 9 hits             | 3.7kb 5' of MMP9  | 3.7kb 5' of MMP9  |
| 11 tissues             | ESC,BLD     |                  | AP-1              |                     | 2 hits         | 10 hits            | 3kb 5' of MMP9    | 3kb 5' of MMP9    |
| 6 tissues              | BLD         |                  | 11 altered motifs |                     |                | 11 hits            | 2.6kb 5' of MMP9  | 2.6kb 5' of MMP9  |
| 6 tissues              | 4 tissues   |                  |                   |                     |                | 9 hits             | 2.6kb 5' of MMP9  | 2.6kb 5' of MMP9  |
| 4 tissues              | BLD,BLD,BLD |                  |                   |                     |                | 11 hits            | 2.4kb 5' of MMP9  | 2.4kb 5' of MMP9  |
| BLD, THYM, SPLN        | BLD         |                  | 6 altered motifs  |                     |                | 11 hits            | 1.9kb 5' of MMP9  | 1.9kb 5' of MMP9  |
| BLD                    | BLD,BLD     |                  | 4 altered motifs  |                     |                | 9 hits             | MMP9              | MMP9              |
|                        | BLD,LIV     |                  | 5 altered motifs  |                     |                | 8 hits             | MMP9              | MMP9              |
| 4 tissues              | ESC         |                  | Pax-4             |                     |                | 12 hits            | MMP9              | MMP9              |
| SKIN                   | 24 tissues  | 7 bound proteins | 4 altered motifs  |                     |                | 7 hits             | MMP9              | MMP9              |

| Enhancer histone marks | DNase       | Proteins bound | Motifs changed    | NHGRI/EBI GWAS hits | GRASP QTL hits | Selected eQTL hits | GENCODE genes     | RefSeq genes      |
|------------------------|-------------|----------------|-------------------|---------------------|----------------|--------------------|-------------------|-------------------|
| 7 tissues              | 4 tissues   |                | 4 altered motifs  |                     | 2 hits         | 20 hits            | 16kb 5' of ZNF335 | 16kb 5' of ZNF335 |
| 15 tissues             | 20 tissues  |                | SP1,STAT,Zfp281   |                     |                | 9 hits             | 3.9kb 5' of MMP9  | 3.9kb 5' of MMP9  |
| 14 tissues             | 19 tissues  |                | 4 altered motifs  |                     |                | 9 hits             | 3.7kb 5' of MMP9  | 3.7kb 5' of MMP9  |
| 11 tissues             | ESC,BLD     |                | AP-1              |                     | 2 hits         | 10 hits            | 3kb 5' of MMP9    | 3kb 5' of MMP9    |
| 6 tissues              | BLD         |                | 11 altered motifs |                     |                | 11 hits            | 2.6kb 5' of MMP9  | 2.6kb 5' of MMP9  |
| 6 tissues              | 4 tissues   |                |                   |                     |                | 9 hits             | 2.6kb 5' of MMP9  | 2.6kb 5' of MMP9  |
| 4 tissues              | BLD,BLD,BLD |                |                   |                     |                | 11 hits            | 2.4kb 5' of MMP9  | 2.4kb 5' of MMP9  |

|                 |            |                  |                  |  |         |                  |                  |
|-----------------|------------|------------------|------------------|--|---------|------------------|------------------|
| BLD, THYM, SPLN | BLD        |                  | 6 altered motifs |  | 11 hits | 1.9kb 5' of MMP9 | 1.9kb 5' of MMP9 |
| BLD             | BLD,BLD    |                  | 4 altered motifs |  | 9 hits  | MMP9             | MMP9             |
|                 | BLD,LIV    |                  | 5 altered motifs |  | 8 hits  | MMP9             | MMP9             |
| 4 tissues       | ESC        |                  | Pax-4            |  | 12 hits | MMP9             | MMP9             |
| SKIN            | 24 tissues | 7 bound proteins | 4 altered motifs |  | 7 hits  | MMP9             | MMP9             |

| Enhancer histone marks | DNase       | Proteins bound   | Motifs changed   | NHGRI/EBI GWAS hits | GRASP QTL hits | Selected eQTL hits | GENCODE genes    | RefSeq genes     |
|------------------------|-------------|------------------|------------------|---------------------|----------------|--------------------|------------------|------------------|
|                        |             |                  | Nkx3             |                     |                | 2 hits             | 18kb 5' of MMP9  | 18kb 5' of MMP9  |
|                        |             |                  | BDP1,LUN-1       |                     |                | 2 hits             | 18kb 5' of MMP9  | 18kb 5' of MMP9  |
| 9 tissues              | BLD,BRN     |                  | Arid5b           |                     |                | 4 hits             | 7.7kb 5' of MMP9 | 7.7kb 5' of MMP9 |
| 6 tissues              | 4 tissues   |                  | 9 altered motifs |                     |                | 3 hits             | 2.7kb 5' of MMP9 | 2.7kb 5' of MMP9 |
| BLD                    | BLD,BLD     |                  | 6 altered motifs |                     |                | 4 hits             | MMP9             | MMP9             |
| BLD                    | BLD,LIV     | 9 bound proteins | 9 altered motifs |                     |                | 3 hits             | MMP9             | MMP9             |
|                        | 16 tissues  |                  | 5 altered motifs |                     |                | 3 hits             | RP11-465L10.7    | SLC12A5          |
|                        |             |                  | Mrg              |                     |                | 3 hits             | RP11-465L10.7    | SLC12A5          |
|                        | BLD,BLD,LNG |                  | CDP              |                     |                | 3 hits             | RP11-465L10.7    | SLC12A5          |
|                        |             | NRSF             | EBF,SZF1-1       |                     |                | 2 hits             | RP11-465L10.7    | SLC12A5          |
|                        | 49 tissues  | NRSF,ZNF143,BCL3 | SZF1-1,T3R       |                     | 2 hits         | 3 hits             | RP11-465L10.7    | SLC12A5          |
|                        |             |                  | BAF155,TFIIA     |                     |                | 2 hits             | SLC12A5          | SLC12A5          |
|                        |             |                  | 4 altered motifs |                     |                | 2 hits             | SLC12A5          | SLC12A5          |

| Enhancer histone marks | DNase      | Proteins bound | Motifs changed   | NHGRI/EBI GWAS hits | GRASP QTL hits | Selected eQTL hits | GENCODE genes | RefSeq genes |
|------------------------|------------|----------------|------------------|---------------------|----------------|--------------------|---------------|--------------|
|                        | 15 tissues | CTCF           | NRSF             |                     |                |                    | MMP9          | MMP9         |
|                        |            |                | 7 altered motifs |                     |                |                    | RP11-465L10.7 | SLC12A5      |

| Enhancer histone marks | DNase      | Proteins bound   | Motifs changed      | NHGRI/EBI GWAS hits | GRASP QTL hits | Selected eQTL hits | GENCODE genes     | RefSeq genes        |
|------------------------|------------|------------------|---------------------|---------------------|----------------|--------------------|-------------------|---------------------|
|                        |            |                  | 8 altered motifs    |                     |                | 6 hits             | 14kb 5' of ZNF335 | 14kb 5' of ZNF335   |
|                        |            |                  | 9 altered motifs    |                     |                | 5 hits             | 14kb 5' of ZNF335 | 14kb 5' of ZNF335   |
| 10 tissues             | CRVX       | MAFK             | 8 altered motifs    |                     | 4 hits         | 10 hits            | 14kb 5' of MMP9   | 14kb 5' of MMP9     |
| BLD, THYM              | ESDR       |                  |                     |                     | 2 hits         | 6 hits             | 6.9kb 5' of MMP9  | 6.9kb 5' of MMP9    |
| 6 tissues              | ESDR,BLD   |                  | Pax-5               |                     | 1 hit          | 9 hits             | 5.2kb 5' of MMP9  | 5.2kb 5' of MMP9    |
| BLD, THYM, SPLN        |            |                  | 24 altered motifs   |                     | 1 hit          | 9 hits             | 1.8kb 5' of MMP9  | 1.8kb 5' of MMP9    |
| BLD, THYM, SPLN        | IPSC       |                  | 4 altered motifs    |                     | 1 hit          | 6 hits             | 1.6kb 5' of MMP9  | 1.6kb 5' of MMP9    |
|                        | 7 tissues  |                  |                     |                     | 2 hits         | 9 hits             | MMP9              | MMP9                |
| BLD                    | 33 tissues | 6 bound proteins | NF-Y                |                     | 1 hit          | 9 hits             | MMP9              | MMP9                |
| SKIN                   | 22 tissues | 4 bound proteins |                     |                     | 1 hit          | 6 hits             | MMP9              | MMP9                |
| BLD                    | BLD,BRST   |                  | Foxo,GR             |                     | 6 hits         | 9 hits             | MMP9              | MMP9                |
|                        |            |                  | 4 altered motifs    |                     | 1 hit          | 6 hits             | MMP9              | MMP9                |
|                        |            |                  | 5 altered motifs    |                     | 1 hit          | 9 hits             | RP11-465L10.10    | 138bp 3' of MMP9    |
|                        |            |                  | 8 altered motifs    |                     |                | 6 hits             | RP11-465L10.10    | 392bp 3' of MMP9    |
|                        |            |                  | HNF4,Zbtb3          |                     |                | 7 hits             | RP11-465L10.10    | 1.7kb 5' of SLC12A5 |
|                        | 21 tissues | 7 bound proteins | Pax-4,ZNF219,Zfp281 |                     | 1 hit          | 5 hits             | RP11-465L10.10    | 9bp 5' of SLC12A5   |

dbSNP

func annot

intronic

intronic

intronic

missense

intronic

intronic

intronic

missense

dbSNP

func annot

intronic

dbSNP

func annot

intronic

intronic  
intronic

intronic  
intronic

intronic  
intronic  
intronic

intronic  
intronic  
intronic

intronic  
intronic  
intronic

intronic  
intronic  
intronic

intronic  
intronic  
intronic

intronic  
intronic

intronic  
intronic

intronic  
intronic

intronic  
intronic

intronic

synonymous

intronic  
synonymous  
missense

intronic

**dbSNP**

**func annot**

intronic

**dbSNP**

**func annot**

intronic

intronic

missense

intronic

synonymous

intronic

intronic

intronic

dbSNP

func annot

intronic

intronic

missense

synonymous

dbSNP

func annot



intronic

intronic

missense

synonymous

**dbSNP**

**func annot**

intronic

intronic

intronic

intronic

intronic

intronic

intronic

intronic

intronic

**dbSNP**

**func annot**

missense

intronic

dbSNP

func annot

intronic

intronic

missense

intronic

synonymous

intronic

intronic

intronic
