# Supplementary material for: Matrix Metalloproteinase Gene Polymorphisms Are Associated with Breast Cancer in the Caucasian Women of Russia
Source: MDPI journal article supplement (doi:10.3390/ijms232012638), 2022-10-20
Supplement: s1 [file s1]

Supplementary Table S11 Gene set enrichment analysis of biological pat  
(Gene Ontology Portal tools, <http://geneontology.org>).

| Database                       | Gene set                                      | Original # genes in gene set |
|--------------------------------|-----------------------------------------------|------------------------------|
| GO biological process complete | cellular response to UV-A                     | 11                           |
|                                | response to UV-A                              | 14                           |
|                                | response to UV                                | 150                          |
|                                | cellular response to UV                       | 91                           |
|                                | cellular response to light stimulus           | 116                          |
|                                | cellular response to radiation                | 181                          |
|                                | cellular response to abiotic stimulus         | 320                          |
|                                | cellular response to environmental stimuli    | 320                          |
|                                | collagen catabolic process                    | 38                           |
|                                | collagen metabolic process                    | 57                           |
|                                | extracellular matrix disassembly              | 47                           |
|                                | extracellular matrix organization             | 294                          |
|                                | extracellular structure organization          | 295                          |
|                                | external encapsulating structure organization | 297                          |
|                                | cellular component disassembly                | 300                          |
|                                | regulation of neuroinflammatory response      | 35                           |
|                                | endodermal cell differentiation               | 41                           |
|                                | endoderm formation                            | 51                           |
|                                | response to amyloid-beta                      | 49                           |
| GO molecular function complete | metalloendopeptidase activity                 | 114                          |
|                                | endopeptidase activity                        | 457                          |
|                                | peptidase activity                            | 643                          |
|                                | metallopeptidase activity                     | 190                          |
|                                | serine-type endopeptidase activity            | 180                          |
|                                | serine-type peptidase activity                | 198                          |
|                                | serine hydrolase activity                     | 202                          |
|                                | zinc ion binding                              | 837                          |
|                                | transition metal ion binding                  | 1113                         |
| GO cellular component complete | extracellular matrix                          | 572                          |
|                                | external encapsulating structure              | 573                          |

|                                    |                                               |      |
|------------------------------------|-----------------------------------------------|------|
| PANTHER Pathways                   | Plasminogen activating cascade                | 17   |
|                                    | Alzheimer disease-presenilin pathway          | 131  |
| PANTHER GO-Slim Molecular Function | metalloendopeptidase activity                 | 84   |
|                                    | endopeptidase activity                        | 324  |
|                                    | peptidase activity                            | 433  |
|                                    | hydrolase activity                            | 1739 |
|                                    | metallopeptidase activity                     | 116  |
| PANTHER GO-Slim Biological Process | extracellular matrix organization             | 74   |
|                                    | external encapsulating structure organization | 74   |
|                                    | extracellular structure organization          | 75   |
|                                    | catabolic process                             | 893  |
| PANTHER Protein Class              | metalloprotease                               | 155  |
|                                    | protease                                      | 595  |
|                                    | protein modifying enzyme                      | 1622 |
| Reactome pathways                  | Activation of Matrix Metalloproteinases       | 33   |
|                                    | Degradation of the extracellular matrix       | 140  |
|                                    | Collagen degradation                          | 64   |
|                                    | Extra-nuclear estrogen signaling              | 73   |
|                                    | Interleukin-4 and Interleukin-13 signaling    | 111  |

hways with 32 BC-associated genes (BC-associated polymorphisms functionality in var

| # genes in gene set analyzed by Gene Ontology | Fold Enrichment | raw P-value        | FDR            |
|-----------------------------------------------|-----------------|--------------------|----------------|
| 4                                             | > 100           | 0.00000000159      | 0.00000625     |
| 4                                             | > 100           | 0.00000000357      | 0.0000112      |
| 4                                             | 23.87           | 0.0000238          | 0.0266         |
| 4                                             | 39.35           | 0.00000351         | 0.00549        |
| 4                                             | 30.87           | 0.00000888         | 0.0127         |
| 4                                             | 19.78           | 0.0000487          | 0.0401         |
| 5                                             | 13.99           | 0.0000252          | 0.0263         |
| 5                                             | 13.99           | 0.0000252          | 0.0247         |
| 7                                             | > 100           | 0.0000000000000346 | 0.000000000542 |
| 7                                             | > 100           | 0.000000000000468  | 0.00000000366  |
| 6                                             | > 100           | 0.0000000000211    | 0.00000011     |
| 7                                             | 21.31           | 0.0000000265       | 0.0000692      |
| 7                                             | 21.24           | 0.0000000271       | 0.0000607      |
| 7                                             | 21.01           | 0.0000000284       | 0.0000556      |
| 6                                             | 17.09           | 0.000000832        | 0.00145        |
| 3                                             | 76.73           | 0.00000998         | 0.013          |
| 3                                             | 65.5            | 0.0000156          | 0.0188         |
| 3                                             | 52.66           | 0.000029           | 0.0253         |
| 3                                             | 54.81           | 0.0000259          | 0.0239         |
| 7                                             | 54.97           | 0.0000000000457    | 0.000000224    |
| 7                                             | 13.71           | 0.000000502        | 0.000411       |
| 7                                             | 27638           | 0.00000474         | 0.00291        |
| 7                                             | 32.98           | 0.00000000141      | 0.00000346     |
| 6                                             | 29.84           | 0.0000000443       | 0.0000724      |
| 6                                             | 27.13           | 0.0000000766       | 0.000094       |
| 6                                             | 26.59           | 0.0000000859       | 0.0000844      |
| 8                                             | 8.56            | 0.00000219         | 0.00153        |
| 8                                             | 6.43            | 0.0000176          | 0.00958        |
| 7                                             | 10.95           | 0.00000221         | 0.0045         |
| 7                                             | 11.94           | 0.00000223         | 0.00228        |

|   |       |                  |               |
|---|-------|------------------|---------------|
| 4 | > 100 | 0.00000000696    | 0.00000111    |
| 5 | 34.17 | 0.000000355      | 0.0000284     |
| 7 | 74.6  | 0.00000000000598 | 0.0000000327  |
| 7 | 19.34 | 0.0000000508     | 0.00000925    |
| 7 | 14.47 | 0.000000351      | 0.000048      |
| 8 | 4.12  | 0.000403         | 0.044         |
| 7 | 54.02 | 0.0000000000514  | 0.000000014   |
| 7 | 84.68 | 0.00000000000259 | 0.00000000574 |
| 7 | 84.68 | 0.00000000000259 | 0.00000000287 |
| 7 | 83.55 | 0.00000000000283 | 0.00000000209 |
| 8 | 8.02  | 0.00000353       | 0.00196       |
| 7 | 40.43 | 0.000000000359   | 0.0000000703  |
| 7 | 10.53 | 0.00000286       | 0.00028       |
| 8 | 4.42  | 0.00025          | 0.0164        |
| 6 | > 100 | 0.00000000000302 | 0.00000000754 |
| 6 | 38.36 | 0.0000000104     | 0.00000865    |
| 6 | 83.92 | 0.000000000119   | 0.000000148   |
| 3 | 36.79 | 0.0000809        | 0.0336        |
| 4 | 32.26 | 0.0000075        | 0.00374       |
