# Supplementary material for: Matrix Metalloproteinase Gene Polymorphisms Are Associated with Breast Cancer in the Caucasian Women of Russia
Source: MDPI journal article supplement (doi:10.3390/ijms232012638), 2022-10-20
Supplement: s1 [file s1]

Supplementary Table S3. Non-synonymous BC-associated SNPs of the *ADAM10* gene (predictive potential were analyzed using the SIFT tool ([https://sift.bii.a-](https://sift.bii.a-star.edu.sg/)

| SNP                                                                            | Amino acid change | PolyPhen-2       |
|--------------------------------------------------------------------------------|-------------------|------------------|
|                                                                                |                   | PolyPhen-2 scope |
| rs1940475, C>T                                                                 | Lys87Glu MMP8     | 0.009            |
| rs3765620, G>A<br>(linked with rs1940475,<br>r <sup>2</sup> =0.85 and D'=1.00) | Thr32Ile MMP8     | 0                |
| rs679620, C>T                                                                  | Lys45Glu MMP3     | 0                |
| rs17576, A>G                                                                   | Gln279Arg MMP9    | 0.004            |
| rs2250889, C>G                                                                 | Arg574Pro MMP9    | 0                |
| rs17577, G>A                                                                   | Arg668Gln MMP9    | 0.001            |

*AMP* genes

-star.edu.sg/) and PolyPhen-2 tool (<http://genetics.bwh.harvard.edu/pph2/>)

| en-2 tool            | SIFT tool  |                 |
|----------------------|------------|-----------------|
| PolyPhen-2prediction | SIFT scope | SIFT prediction |
| benign               | 0.12       | tolerated       |
| benign               | 0.33       | tolerated       |
| benign               | 1          | tolerated       |
| benign               | 0.29       | tolerated       |
| benign               | 1          | tolerated       |
| benign               | 0.65       | tolerated       |
