# Supplementary material for: Matrix Metalloproteinase Gene Polymorphisms Are Associated with Breast Cancer in the Caucasian Women of Russia
Source: MDPI journal article supplement (doi:10.3390/ijms232012638), 2022-10-20
Supplement: s1 [file s1]

Supplementary table S1

The allele and genotype frequencies of the studied SNPs in the breast cancer and control groups

| Chr                            | SNP       | Gene         | Minor allele | Major allele | Minor allele frequency | Number of the studied chromosomes | Genotype distribution* | H <sub>o</sub> | H <sub>e</sub> | P <sub>HWE</sub> |
|--------------------------------|-----------|--------------|--------------|--------------|------------------------|-----------------------------------|------------------------|----------------|----------------|------------------|
| Breast cancer patients (n=358) |           |              |              |              |                        |                                   |                        |                |                |                  |
| 11                             | rs1940475 | <i>MMP-8</i> | T            | C            | 0.482                  | 710                               | 76/190/89              | 0.535          | 0.499          | 0.202            |
| 11                             | rs1799750 | <i>MMP-1</i> | 2G           | 1G           | 0.469                  | 708                               | 76/180/98              | 0.509          | 0.498          | 0.749            |
| 11                             | rs679620  | <i>MMP-3</i> | T            | C            | 0.473                  | 712                               | 77/183/96              | 0.514          | 0.499          | 0.596            |
| 16                             | rs243865  | <i>MMP-2</i> | T            | C            | 0.236                  | 700                               | 17/131/202             | 0.374          | 0.360          | 0.554            |
| 20                             | rs3918242 | <i>MMP-9</i> | T            | C            | 0.170                  | 708                               | 15/90/249              | 0.254          | 0.282          | 0.086            |
| 20                             | rs3918249 | <i>MMP-9</i> | C            | T            | 0.359                  | 696                               | 51/148/149             | 0.425          | 0.460          | 0.163            |
| 20                             | rs17576   | <i>MMP-9</i> | G            | A            | 0.342                  | 704                               | 47/147/158             | 0.418          | 0.450          | 0.192            |
| 20                             | rs3787268 | <i>MMP-9</i> | A            | G            | 0.233                  | 700                               | 23/117/210             | 0.334          | 0.357          | 0.232            |
| 20                             | rs2250889 | <i>MMP-9</i> | G            | C            | 0.080                  | 710                               | 4/49/302               | 0.138          | 0.148          | 0.264            |
| 20                             | rs17577   | <i>MMP-9</i> | A            | G            | 0.166                  | 706                               | 14/89/250              | 0.252          | 0.277          | 0.120            |
| Control group (n=746)          |           |              |              |              |                        |                                   |                        |                |                |                  |
| 11                             | rs1940475 | <i>MMP-8</i> | T            | C            | 0.489                  | 1482                              | 194/337/210            | 0.455          | 0.500          | 0.015            |
| 11                             | rs1799750 | <i>MMP-1</i> | 2G           | 1G           | 0.464                  | 1446                              | 168/335/220            | 0.463          | 0.497          | 0.073            |
| 11                             | rs679620  | <i>MMP-3</i> | T            | C            | 0.499                  | 1478                              | 188/361/190            | 0.489          | 0.500          | 0.556            |
| 16                             | rs243865  | <i>MMP-2</i> | T            | C            | 0.249                  | 1464                              | 52/261/419             | 0.357          | 0.374          | 0.200            |
| 20                             | rs3918242 | <i>MMP-9</i> | T            | C            | 0.167                  | 1470                              | 18/209/508             | 0.284          | 0.278          | 0.596            |
| 20                             | rs3918249 | <i>MMP-9</i> | C            | T            | 0.389                  | 1470                              | 113/346/276            | 0.471          | 0.475          | 0.816            |
| 20                             | rs17576   | <i>MMP-9</i> | G            | A            | 0.389                  | 1486                              | 119/340/284            | 0.458          | 0.475          | 0.316            |
| 20                             | rs3787268 | <i>MMP-9</i> | A            | G            | 0.215                  | 1478                              | 30/258/451             | 0.349          | 0.338          | 0.386            |
| 20                             | rs2250889 | <i>MMP-9</i> | G            | C            | 0.110                  | 1470                              | 15/131/589             | 0.178          | 0.195          | 0.023            |
| 20                             | rs17577   | <i>MMP-9</i> | A            | G            | 0.170                  | 1452                              | 20/207/499             | 0.285          | 0.282          | 0.896            |

Note: \* minor allele homozygotes / heterozygotes / major allele homozygotes
