# Supplementary material for: Matrix Metalloproteinase Gene Polymorphisms Are Associated with Breast Cancer in the Caucasian Women of Russia
Source: MDPI journal article supplement (doi:10.3390/ijms232012638), 2022-10-20
Supplement: s1 [file s1]

Supplementary table S5 Effect of the BC-associated *MMP* gene polymorphisms ( HaploReg, v4.1, <http://archive.broadinstitute.org/mammals/haploreg/haploreg.php>)

| SNPs                          | transcription factors | log-odds (LOD) коэффициент |                          | $\Delta$ LOD |
|-------------------------------|-----------------------|----------------------------|--------------------------|--------------|
|                               |                       | reference (ref) allele     | alternative (alt) allele |              |
| rs1940475<br>(ref:T, alt:C)   | CIZ                   | 12.6                       | 0.7                      | -11.9        |
|                               | Myc                   | 12.5                       | 3.3                      | -9.2         |
|                               | NF-AT1                | 0.7                        | 12.6                     | 11.9         |
| rs1799750<br>(ref:2G, alt:1G) | AP-1                  | 6.4                        | -5.5                     | -11.9        |
|                               | CHX10                 | -16.3                      | -15.3                    | 1.0          |
|                               | DMRT2                 | -18.3                      | -10.9                    | 7.4          |
|                               | Dbx1                  | 10.0                       | 9.5                      | -0.5         |
|                               | En-1                  | 5.8                        | 5.5                      | -0.3         |
|                               | Ets                   | -28.5                      | -24.7                    | 3.8          |
|                               | Evi-1                 | 13.6                       | 6.2                      | -7.4         |
|                               | GATA                  | 10.2                       | 10.8                     | 0.6          |
|                               | HMG-IY                | 3.1                        | -4.9                     | -8.0         |
|                               | Hlx1                  | 7.5                        | 8.0                      | 0.5          |
|                               | Hoxb4                 | 6.2                        | 6.3                      | 0.1          |
|                               | Msx-1                 | 11.8                       | 12.2                     | 0.4          |
|                               | Ncx                   | 9.5                        | 11.0                     | 1.5          |
|                               | Nkx6-1                | 3.6                        | 3.8                      | 0.2          |
|                               | PLZF                  | -2.6                       | 5.9                      | 8.5          |
|                               | Pax-4                 | 3.0                        | 4.5                      | 1.5          |
|                               | Pax-6                 | 8.0                        | 8.4                      | 0.4          |
|                               | Pou2f2                | 11.6                       | 12.5                     | 0.9          |
|                               | Pou3f2                | 10.3                       | 9.4                      | -0.9         |
|                               | Pou3f4                | 2.4                        | 3.2                      | 0.8          |
|                               | Pou6f1                | 9.6                        | 10.4                     | 0.8          |
| rs679620<br>(ref:T, alt:C)    | p300                  | 16.4                       | 14.3                     | -2.0         |
| rs243865<br>(ref:C, alt:T)    | Myf                   | 7.6                        | -4.3                     | -11.9        |
| rs3918242<br>(ref:C, alt:T)   | Ahr:Arnt              | 11.3                       | -0.6                     | -11.9        |
|                               | E2F                   | 6.2                        | 10.2                     | 4.0          |
|                               | HIF1                  | 7.2                        | -4.7                     | -11.9        |
|                               | Myc                   | 10.4                       | -0.9                     | -11.3        |
| rs3918249<br>(ref:T, alt:C)   | Arid3a                | 11.0                       | 10.3                     | -0.7         |
|                               | Hmx                   | 9.7                        | 11.6                     | 1.9          |
|                               | Hoxb8                 | 9.5                        | 12.4                     | 2.9          |
|                               | Pax-5                 | 12.7                       | 8.8                      | -3.9         |

|                             |        |      |      |      |
|-----------------------------|--------|------|------|------|
| rs17576<br>(ref:A, alt:G)   | Pax-4  | 11.6 | 9.5  | -2.1 |
| rs3787268<br>(ref:G, alt:A) | HDAC2  | 11.6 | 13.2 | 1.6  |
|                             | Mef2   | -5.5 | 6.5  | 12.0 |
|                             | Pou1f1 | 9.9  | 11.7 | 1.8  |
|                             | Sox    | 5.9  | 14.2 | 8.3  |
|                             | Zfp105 | 9.6  | 13.1 | 3.5  |
|                             | p300   | 11.8 | 12.7 | 0.9  |
| rs2250889<br>(ref:G, alt:C) | NRSF   | 6.5  | 11.1 | 4.6  |

*Note:*  $\Delta\text{LOD} = \text{LOD}(\text{alt}) - \text{LOD}(\text{ref})$ . A negative value indicates the increased affinity of this

### on affinity of the DNA regulatory motifs

| increases (+) or<br>decreases (-)<br>affinity motifs |
|------------------------------------------------------|
| -                                                    |
| -                                                    |
| +                                                    |
| -                                                    |
| +                                                    |
| +                                                    |
| -                                                    |
| -                                                    |
| +                                                    |
| -                                                    |
| +                                                    |
| -                                                    |
| +                                                    |
| +                                                    |
| +                                                    |
| +                                                    |
| +                                                    |
| +                                                    |
| +                                                    |
| +                                                    |
| +                                                    |
| +                                                    |
| -                                                    |
| +                                                    |
| +                                                    |
| -                                                    |
| -                                                    |
| -                                                    |
| -                                                    |
| -                                                    |
| +                                                    |
| +                                                    |
| -                                                    |

|   |
|---|
| - |
| + |
| + |
| + |
| + |
| + |
| + |
| + |

motif for the reference allele, while a positive value suggests the respective increase for the alternative



3 allele.
